# Supplementary material for: Non-communicable diseases in sub-Saharan Africa: a scoping review of large cohort studies
Source: PubMed Central journal article supplement (PMC6684871; doi:10.7189/jogh.09.020409), 2019-12
Supplement: jogh-09-020409-s001.pdf [file jogh-09-020409-s001.pdf]

**SUPPLEMENTAL INFORMATION**

| <b>Supplemental Table</b>                                                                                                                                      | <b>Page</b> |
|----------------------------------------------------------------------------------------------------------------------------------------------------------------|-------------|
| STable 1: MEDLINE search strategy                                                                                                                              | 2           |
| STable 2: Data extraction form                                                                                                                                 | 6           |
| STable 3: Studies that were excluded after obtaining the full-text article                                                                                     | 8           |
| STable 4a: Characteristics of included studies with only children and young adults aged <20 years, sampled from general populations                            | 32          |
| STable 4b: Characteristics of included studies with mixed (children and adults) populations, sampled from general and from clinical populations                | 33          |
| STable 4c: Characteristics of included studies with only adults aged >18 yrs, sampled from general populations                                                 | 35          |
| STable 4d: Characteristics of included studies with only adults aged >18yrs, sampled from occupational and clinical populations                                | 37          |
| STable 5a: Participant characteristics of included studies with children and young adults aged <20 years, sampled from general populations                     | 40          |
| STable 5b: Participant characteristics of included studies with mixed (children and adults) populations, sampled from general and clinical populations         | 41          |
| STable 5c: Participant characteristics of included studies with only adults aged >18 yrs, sampled from general populations                                     | 43          |
| STable 5d: Participant characteristics of included studies with only adults aged >18 yrs, sampled from occupational and clinical populations                   | 45          |
| STable 6a: Characteristics of chronic NCD data of included studies with children and young adults aged <20 years, sampled from general populations             | 48          |
| STable 6b: Characteristics of chronic NCD data of included studies with mixed (children and adults) populations, sampled from general and clinical populations | 50          |
| STable 6c: Characteristics of chronic NCD data of included studies with adults aged >18 years, sampled from general populations                                | 54          |
| STable 6d: Characteristics of chronic NCD data of included studies with adults aged >18 years, sampled from occupational and clinical populations              | 59          |
| STable 7a: Characteristics of risk factor data of included studies with children and young adults aged <20 years, sampled from general populations             | 69          |
| STable 7b: Characteristics of risk factor data of included studies with mixed (children and adults) populations, sampled from general and clinical populations | 72          |
| STable 7c: Characteristics of risk factor data of included studies with adults aged >18 years, sampled from general populations                                | 80          |
| STable 7d: Characteristics of risk factor data of included studies with adults aged >18 years, sampled from occupational and clinical populations              | 89          |

**STable 1: MEDLINE search strategy**

| #  | Search terms                                                                                                                                                                                                    | Results |
|----|-----------------------------------------------------------------------------------------------------------------------------------------------------------------------------------------------------------------|---------|
| 1  | "africa south of the sahara"/ or africa, central/ or africa, eastern/ or africa, southern/ or africa, western/                                                                                                  | 18735   |
| 2  | ("africa south of the sahara" or sub-saharan africa or central africa or eastern africa or southern africa or western africa).ti,ab.                                                                            | 20044   |
| 3  | Benin/                                                                                                                                                                                                          | 1339    |
| 4  | (Benin or Dahomey).ti,ab.                                                                                                                                                                                       | 2561    |
| 5  | Burkina Faso/                                                                                                                                                                                                   | 2824    |
| 6  | (Burkina Faso or Burkina Fasso or Upper Volta).ti,ab.                                                                                                                                                           | 3149    |
| 7  | Burundi/                                                                                                                                                                                                        | 603     |
| 8  | Burundi.ti,ab.                                                                                                                                                                                                  | 633     |
| 9  | Central African Republic/                                                                                                                                                                                       | 721     |
| 10 | (Central African Republic or Ubangi-Shari).ti,ab.                                                                                                                                                               | 817     |
| 11 | Chad/                                                                                                                                                                                                           | 653     |
| 12 | Chad.ti,ab.                                                                                                                                                                                                     | 896     |
| 13 | Comoros/                                                                                                                                                                                                        | 262     |
| 14 | (Comoros or Comoro Islands or Mayotte or Iles Comores).ti,ab.                                                                                                                                                   | 438     |
| 15 | "Democratic Republic of the Congo"/                                                                                                                                                                             | 3662    |
| 16 | ((demographic republic adj2 congo) or belgian congo or zaire).ti,ab.                                                                                                                                            | 3432    |
| 17 | Eritrea/                                                                                                                                                                                                        | 272     |
| 18 | Eritrea.ti,ab.                                                                                                                                                                                                  | 362     |
| 19 | Ethiopia/                                                                                                                                                                                                       | 9799    |
| 20 | Ethiopia.ti,ab.                                                                                                                                                                                                 | 8585    |
| 21 | Gambia/                                                                                                                                                                                                         | 2295    |
| 22 | Gambia.ti,ab.                                                                                                                                                                                                   | 1950    |
| 23 | Guinea/                                                                                                                                                                                                         | 903     |
| 24 | (Guinea not (New Guinea or Guinea Pig* or Guinea Fowl)).ti,ab.                                                                                                                                                  | 3086    |
| 25 | Guinea-Bissau/                                                                                                                                                                                                  | 853     |
| 26 | (Guinea-Bissau or Portuguese Guinea).ti,ab.                                                                                                                                                                     | 845     |
| 27 | Liberia/                                                                                                                                                                                                        | 1053    |
| 28 | Liberia.ti,ab.                                                                                                                                                                                                  | 1140    |
| 29 | Madagascar/                                                                                                                                                                                                     | 3045    |
| 30 | (Madagascar or Malagasy Republic).ti,ab.                                                                                                                                                                        | 3619    |
| 31 | Malawi/                                                                                                                                                                                                         | 4369    |
| 32 | (Malawi or Nyasaland).ti,ab.                                                                                                                                                                                    | 4703    |
| 33 | Mali/                                                                                                                                                                                                           | 2107    |
| 34 | Mali.ti,ab.                                                                                                                                                                                                     | 2652    |
| 35 | Mozambique/                                                                                                                                                                                                     | 1989    |
| 36 | (Mozambique or Mocambique or Portuguese East Africa).ti,ab.                                                                                                                                                     | 2509    |
| 37 | Niger/                                                                                                                                                                                                          | 1064    |
| 38 | (Niger not (Aspergillus or Peptococcus or Schizothorax or Cruciferae or Gobius or Lasius or Agelastes or Melanosuchus or radish or Parastromateus or Orius or Aperiullus or Parastromateus or Stomoxys)).ti,ab. | 2491    |
| 39 | Rwanda/                                                                                                                                                                                                         | 1998    |
| 40 | (Rwanda or Ruanda).ti,ab.                                                                                                                                                                                       | 2039    |
| 41 | Senegal/                                                                                                                                                                                                        | 5297    |
| 42 | senegal.ti,ab.                                                                                                                                                                                                  | 4607    |
| 43 | Sierra Leone/                                                                                                                                                                                                   | 1274    |
| 44 | Sierra Leone.mp.                                                                                                                                                                                                | 1764    |
| 45 | Somalia/                                                                                                                                                                                                        | 1415    |
| 46 | Somalia.ti,ab.                                                                                                                                                                                                  | 1041    |
| 47 | South Sudan/                                                                                                                                                                                                    | 88      |
| 48 | south sudan.ti,ab.                                                                                                                                                                                              | 315     |
| 49 | Tanzania/                                                                                                                                                                                                       | 9821    |
| 50 | (Tanzania or Tanganyika or Zanzibar).ti,ab.                                                                                                                                                                     | 9773    |
| 51 | Togo/                                                                                                                                                                                                           | 1000    |
| 52 | (Togo or Togolese Republic).ti,ab.                                                                                                                                                                              | 1117    |
| 53 | Uganda/                                                                                                                                                                                                         | 10311   |
| 54 | Uganda.ti,ab.                                                                                                                                                                                                   | 9919    |

|     |                                                                                     |         |
|-----|-------------------------------------------------------------------------------------|---------|
| 55  | Zimbabwe/                                                                           | 5354    |
| 56  | (Zimbabe or Rhodesia).ti,ab.                                                        | 4775    |
| 57  | Angola/                                                                             | 867     |
| 58  | angola.ti,ab.                                                                       | 1034    |
| 59  | Cameroon/                                                                           | 4740    |
| 60  | Cameroon.ti,ab.                                                                     | 4947    |
| 61  | Cape Verde/                                                                         | 153     |
| 62  | (Cape Verde or Cabo Verde).ti,ab.                                                   | 443     |
| 63  | Congo/                                                                              | 1666    |
| 64  | (congo not ((democratic republic adj3 congo) or congo red or crimean-congo)).ti,ab. | 2090    |
| 65  | Cote d'Ivoire/                                                                      | 2864    |
| 66  | (Cote d'Ivoire or Ivory Coast).ti,ab.                                               | 3079    |
| 67  | Ghana/                                                                              | 6561    |
| 68  | (Ghana or Gold Coast).ti,ab.                                                        | 6694    |
| 69  | Kenya/                                                                              | 13981   |
| 70  | kenya.mp.                                                                           | 16901   |
| 71  | Lesotho/                                                                            | 367     |
| 72  | (Lesotho or Basutoland).ti,ab.                                                      | 510     |
| 73  | Mauritania/                                                                         | 398     |
| 74  | Mauritania.ti,ab.                                                                   | 478     |
| 75  | Nigeria/                                                                            | 25460   |
| 76  | Nigeria.ti,ab.                                                                      | 19666   |
| 77  | Atlantic Islands/                                                                   | 724     |
| 78  | (sao tome adj2 principe).ti,ab.                                                     | 106     |
| 79  | Sudan/                                                                              | 4378    |
| 80  | (Sudan not south sudan).ti,ab.                                                      | 5749    |
| 81  | Swaziland/                                                                          | 482     |
| 82  | Swaziland.ti,ab.                                                                    | 634     |
| 83  | Zambia/                                                                             | 3916    |
| 84  | (Zambia or Northern Rhodesia).ti,ab.                                                | 3808    |
| 85  | Botswana/                                                                           | 1525    |
| 86  | (Botswana or Bechuanaland or Kalahari).ti,ab.                                       | 1788    |
| 87  | Equatorial Guinea/                                                                  | 230     |
| 88  | (Equatorial Guinea or Spanish Guinea).ti,ab.                                        | 336     |
| 89  | Gabon/                                                                              | 1360    |
| 90  | (Gabon or Gabonese Republic).ti,ab.                                                 | 1414    |
| 91  | Mauritius/                                                                          | 513     |
| 92  | (Mauritius or Agalega Islands).ti,ab.                                               | 725     |
| 93  | Namibia/                                                                            | 905     |
| 94  | Namibia.ti,ab.                                                                      | 1038    |
| 95  | South Africa/                                                                       | 37465   |
| 96  | South Africa.ti,ab.                                                                 | 23379   |
| 97  | Seychelles/                                                                         | 328     |
| 98  | Seychelles.ti,ab.                                                                   | 541     |
| 99  | or/1-98 [ALL COUNTRIES IN SUB-SAHARAN AFRICA]                                       | 216458  |
| 100 | Epidemiologic studies/                                                              | 7708    |
| 101 | exp Cohort studies/                                                                 | 1749070 |
| 102 | 100 or 101                                                                          | 1755715 |
| 103 | (cohort stud*).ti,ab.                                                               | 131703  |
| 104 | (cohort analy*).ti,ab.                                                              | 5335    |
| 105 | (follow-up).ti,ab.                                                                  | 736920  |
| 106 | (followup).ti,ab.                                                                   | 17427   |
| 107 | (prospective stud*).ti,ab.                                                          | 137524  |
| 108 | (longitudinal stud*).ti,ab.                                                         | 55691   |
| 109 | (retrospective stud*).ti,ab.                                                        | 108903  |
| 110 | (panel stud*).ti,ab.                                                                | 1616    |
| 111 | (panel analy*).ti,ab.                                                               | 382     |
| 112 | 103 or 104 or 105 or 106 or 107 or 108 or 109 or 110 or 111 or 112                  | 1088161 |
| 113 | 102 or 112                                                                          | 2154971 |

|     |                                                                                                                                                                                          |         |
|-----|------------------------------------------------------------------------------------------------------------------------------------------------------------------------------------------|---------|
| 114 | exp Renal Insufficiency, chronic/                                                                                                                                                        | 102826  |
| 115 | ((chronic or acute or reduced or progress*) adj6 (renal or kidney) adj5 (failure* or disease* or insufficienc* or injur* or damage* or impairment* or function* or dysfunction*)).ti,ab. | 112000  |
| 116 | ((end-stage* or endstage*) adj4 (renal or kidney)).ti,ab.                                                                                                                                | 32416   |
| 117 | (ESRD or ESKD or ESKF or CKD or CRD or CKF).ti,ab.                                                                                                                                       | 31609   |
| 118 | (proteinuri* or creatinine*).ti,ab.                                                                                                                                                      | 115964  |
| 119 | (glomerul* adj3 filtrat* adj3 rate*).ti,ab.                                                                                                                                              | 34048   |
| 120 | (GFR or eGFR).ti,ab.                                                                                                                                                                     | 53925   |
| 121 | 114 or 115 or 116 or 117 or 118 or 119 or 120                                                                                                                                            | 317540  |
| 122 | Lung Diseases, Obstructive/                                                                                                                                                              | 18090   |
| 123 | exp Pulmonary Disease, Chronic Obstructive/                                                                                                                                              | 48427   |
| 124 | exp Asthma/                                                                                                                                                                              | 119532  |
| 125 | 122 or 123 or 124                                                                                                                                                                        | 178292  |
| 126 | (obstruct* adj3 (pulmonary or lung* or airway* or bronch* or respirat*)).ti,ab.                                                                                                          | 66118   |
| 127 | (COPD or COAD or COBD or AECB).ti,ab.                                                                                                                                                    | 33189   |
| 128 | (asthma* or wheez* or emphy#ema or dyspnea).ti,ab.                                                                                                                                       | 178358  |
| 129 | (chronic* adj3 (pulmonary or lung* or airway* or bronch* or respirat*)).ti,ab.                                                                                                           | 78568   |
| 130 | (spirometry).ti,ab.                                                                                                                                                                      | 12714   |
| 131 | 126 or 127 or 128 or 129 or 130                                                                                                                                                          | 269986  |
| 132 | 125 or 131                                                                                                                                                                               | 299822  |
| 133 | Cardiovascular diseases/                                                                                                                                                                 | 130657  |
| 134 | exp Hypertension/                                                                                                                                                                        | 239229  |
| 135 | 133 or 134 or 134                                                                                                                                                                        | 505365  |
| 136 | hypertens*.ti,ab.                                                                                                                                                                        | 354324  |
| 137 | ((elevat* or high or increase*) adj3 blood adj pressur*).ti,ab.                                                                                                                          | 35234   |
| 138 | ((systolic or diastolic or arter*) adj3 pressur*).ti,ab.                                                                                                                                 | 173368  |
| 139 | (SBP or DBP).ti,ab.                                                                                                                                                                      | 20660   |
| 140 | 136 or 137 or 138 or 139                                                                                                                                                                 | 1543276 |
| 141 | 135 or 140                                                                                                                                                                               | 1688081 |
| 142 | Neoplasms/                                                                                                                                                                               | 385438  |
| 143 | Prostate/                                                                                                                                                                                | 33031   |
| 144 | exp Prostatic Neoplasms/                                                                                                                                                                 | 114402  |
| 145 | Uterine Cervical Neoplasms/                                                                                                                                                              | 69196   |
| 146 | exp Breast Neoplasms/                                                                                                                                                                    | 263917  |
| 147 | Carcinoma, Ductal, Breast/                                                                                                                                                               | 14556   |
| 148 | Esophageal Neoplasms/                                                                                                                                                                    | 45865   |
| 149 | exp Liver Neoplasms/                                                                                                                                                                     | 150300  |
| 150 | 142 or 143 or 144 or 145 or 146 or 147 or 148 or 149                                                                                                                                     | 1008626 |
| 151 | (cancer* or neoplasm* or carcinoma* or tumo?r* or metasta* or malig* or adenocarcinoma* or sarcoma* or leiomyosarcoma* or dcis or duct* or intraduct* or medullary or tubular).ti,ab.    | 2789143 |
| 152 | (prostat* or cerv* or breast or mammar* or esohag* or oesaphag* or liver*).ti,ab.                                                                                                        | 1401244 |
| 153 | 151 and 153                                                                                                                                                                              | 639282  |
| 154 | 150 or 153                                                                                                                                                                               | 1187973 |
| 155 | exp Diabetes Mellitus, Type 2/                                                                                                                                                           | 114375  |
| 156 | exp Hyperglycemia/                                                                                                                                                                       | 32712   |
| 157 | exp Hyperinsulinism/                                                                                                                                                                     | 78640   |
| 158 | 155 or 156 or 157                                                                                                                                                                        | 199505  |
| 159 | (Type* adj3 ("2" or II or two*) adj3 (diabete* or diabetic*)).ti,ab.                                                                                                                     | 102566  |
| 160 | ((Non-insulin* or Non insulin* or Noninsulin*) adj3 depend* adj3 (diabete* or diabetic*)).ti,ab.                                                                                         | 11397   |
| 161 | (NIDDM).ti,ab.                                                                                                                                                                           | 6717    |
| 162 | (hyperglyc?emi* or hyperinsulin*).ti,ab.                                                                                                                                                 | 65353   |
| 163 | 159 or 160 or 161 or 162                                                                                                                                                                 | 165208  |
| 164 | 158 or 163                                                                                                                                                                               | 249545  |
| 165 | exp Obesity/                                                                                                                                                                             | 186186  |
| 166 | exp Overweight/                                                                                                                                                                          | 191324  |
| 167 | 165 or 166                                                                                                                                                                               | 194030  |

|     |                                                  |         |
|-----|--------------------------------------------------|---------|
| 168 | (obesity or obese).ti,ab.                        | 217631  |
| 169 | (overweight or over-weight or overweight).ti,ab. | 49565   |
| 170 | (adipos*).ti,ab.                                 | 79728   |
| 171 | 168 or 169 or 170                                | 283311  |
| 172 | 167 or 171                                       | 324315  |
| 173 | 121 or 132 or 141 or 154 or 164 or 170           | 3674613 |
| 174 | 99 and 113 and 173                               | 4123    |
| 175 | limit 175 to (humans and yr="2000-Current")      | 3245    |

**STable 2: Data extraction form**

|                                                                                                                                                                    |  |
|--------------------------------------------------------------------------------------------------------------------------------------------------------------------|--|
| <b>Cohort Name</b>                                                                                                                                                 |  |
| Study ID of relevant publication(s)                                                                                                                                |  |
| Corresponding authors' contact details                                                                                                                             |  |
| <b>Study Characteristics</b>                                                                                                                                       |  |
| Country                                                                                                                                                            |  |
| Study design                                                                                                                                                       |  |
| Start date                                                                                                                                                         |  |
| End date                                                                                                                                                           |  |
| Total duration of study                                                                                                                                            |  |
| # of data collection points                                                                                                                                        |  |
| Main focus                                                                                                                                                         |  |
| Funding of study                                                                                                                                                   |  |
| Potential for data access?                                                                                                                                         |  |
| <b>Participant Characteristics</b>                                                                                                                                 |  |
| Sampling frame                                                                                                                                                     |  |
| Method of sampling                                                                                                                                                 |  |
| Inclusion/Exclusion criteria                                                                                                                                       |  |
| # eligible                                                                                                                                                         |  |
| # enrolled                                                                                                                                                         |  |
| Sample size at final evaluation                                                                                                                                    |  |
| Response rate                                                                                                                                                      |  |
| Age (mean)                                                                                                                                                         |  |
| Possible to stratify on age?                                                                                                                                       |  |
| Sex (%)                                                                                                                                                            |  |
| Ethnicity (%)                                                                                                                                                      |  |
| Rural/urban (%)                                                                                                                                                    |  |
| Comparison groups reported (N)                                                                                                                                     |  |
| <b>Chronic NCD data</b>                                                                                                                                            |  |
| Chronic NCD(s)<br>(repeat for each NCD)                                                                                                                            |  |
| Chronic NCD                                                                                                                                                        |  |
| Definition                                                                                                                                                         |  |
| Source of measurement                                                                                                                                              |  |
| Time points measured                                                                                                                                               |  |
| Reporting of chronic NCD                                                                                                                                           |  |
| Estimate in total sample                                                                                                                                           |  |
| Associated risk factor(s) reported                                                                                                                                 |  |
| <b>Risk Factor data</b>                                                                                                                                            |  |
| Demographic & Environmental risk factors<br>(ie education, SES, occupation, indoor/outdoor pollution, occupational exposure; repeat for each risk factor)          |  |
| Risk factor                                                                                                                                                        |  |
| Definition                                                                                                                                                         |  |
| Time points measured                                                                                                                                               |  |
| Source of measurement                                                                                                                                              |  |
| Lifestyle risk factors<br>(ie smoking status, alcohol use, physical activity, diet, sexual behaviour, breastfeeding, age at menarche; repeat for each risk factor) |  |
| Risk factor                                                                                                                                                        |  |

|                                                                                                                                                                                                               |  |
|---------------------------------------------------------------------------------------------------------------------------------------------------------------------------------------------------------------|--|
| Definition                                                                                                                                                                                                    |  |
| Time points measured                                                                                                                                                                                          |  |
| Source of measurement                                                                                                                                                                                         |  |
| Physiological risk factors<br>(ie BP, height, weight, WC, fasting blood glucose, HC, lipids, urinalysis, HIV infection, TB infection, anaemia, body composition, OGTT, genetics; repeat for each risk factor) |  |
| Risk factor                                                                                                                                                                                                   |  |
| Definition                                                                                                                                                                                                    |  |
| Time points measured                                                                                                                                                                                          |  |
| Source of measurement                                                                                                                                                                                         |  |
| Stored samples?<br>(repeat for each type of sample)                                                                                                                                                           |  |
| Type of sample                                                                                                                                                                                                |  |
| Method of storage                                                                                                                                                                                             |  |
| <b>Results</b>                                                                                                                                                                                                |  |
| Loss to follow-up<br>(if yes, give reasons)                                                                                                                                                                   |  |
| <b>Notes</b>                                                                                                                                                                                                  |  |

STable 3: Studies that were excluded after obtaining the full-text article

| Study ID      | Identified through | Title                                                                                                                                                                     | Journal                                                            | Country  | Study Design    | # of participants | # of data collection points | follow-up time | Reason for exclusion |
|---------------|--------------------|---------------------------------------------------------------------------------------------------------------------------------------------------------------------------|--------------------------------------------------------------------|----------|-----------------|-------------------|-----------------------------|----------------|----------------------|
| Abdissa 2014  | database           | Spectrum of cardiovascular diseases among Ethiopian patients in Tikur Anbessa Specialised University Teaching Hospital, Addis Abba.                                       | Ethiopian medical journal                                          | Ethiopia | cohort study    | <500              |                             |                | small                |
| Accorsi 2009  | database           | Poverty, inequality and health: the challenge of the double burden of disease in a non-profit hospital in rural Ethiopia.                                                 | Transactions of the Royal Society of Tropical Medicine and Hygiene | Ethiopia | cross-sectional |                   |                             |                | cross-sectional      |
| Amberbir 2011 | database           | Effects of helicobacter pylori, geohelminth infection and selected commensal bacteria on the risk of allergic disease and sensitization in 3-year-old Ethiopian children. | Clinical and experimental allergy                                  | Ethiopia | cross-sectional |                   |                             |                | cross-sectional      |



| Study ID        | Identified through | Title                                                                                                                                                                           | Journal                          | Country                                           | Study Design        | # of participants | # of data collection points | follow-up time | Reason for exclusion |
|-----------------|--------------------|---------------------------------------------------------------------------------------------------------------------------------------------------------------------------------|----------------------------------|---------------------------------------------------|---------------------|-------------------|-----------------------------|----------------|----------------------|
| Amberbir 2011c  | database           | Frequent use of paracetamol and risk of allergic disease among women in an Ethiopian population.                                                                                | PloS one                         | Ethiopia                                          | cross-sectional     |                   |                             |                | cross-sectional      |
| Anastos 2010    | database           | Risk factors for cervical precancer and cancer in HIV-infected, HPV-positive Rwandan women.                                                                                     | PloS one                         | Rwanda                                            | cross-sectional     |                   |                             |                | cross-sectional      |
| Arokiasamy 2017 | database           | Chronic noncommunicable diseases in 6 low- and middle-income countries: findings from wave 1 of the world health organization's study on global ageing and adult health (SAGE). | American journal of epidemiology | China, Ghana, India, Mexico, Russia, South Africa | cross-sectional     |                   |                             |                | cross-sectional      |
| Arokiasamy 2017 | database           | Chronic noncommunicable diseases in 6 low- and middle-income countries: findings from wave 1 of the                                                                             | American journal of epidemiology | China, Ghana, India, Mexico, Russia, South Africa | international study |                   |                             |                | international        |

| Study ID    | Identified through | Title                                                                                                                                                | Journal           | Country                                           | Study Design    | # of participants | # of data collection points | follow-up time | Reason for exclusion |
|-------------|--------------------|------------------------------------------------------------------------------------------------------------------------------------------------------|-------------------|---------------------------------------------------|-----------------|-------------------|-----------------------------|----------------|----------------------|
|             |                    | world health organization's study on global ageing and adult health (SAGE).                                                                          |                   |                                                   |                 |                   |                             |                |                      |
| Atiase 2015 | database           | A comparison of indices of glucose metabolism in five black populations: data from medling the epidemiologic transition study.                       | BMC public health | US, Jamaica, Ghana, South Africa, Seychelles      | cross-sectional |                   |                             |                | cross-sectional      |
| Atiase 2015 | database           | A comparison of indices of glucose metabolism in five black populations: data from medling the epidemiologic transition study.                       | BMC public health | US, Jamaica, Ghana, South Africa, Seychelles      | cross-sectional |                   |                             |                | cross-sectional      |
| Basu 2013   | database           | Social epidemiology of hypertension in middle-income countries: determinants of prevalence, diagnosis, treatment, and control in the WHO SAGE study. | Hypertension      | China, Ghana, India, Mexico, Russia, South Africa | cross-sectional |                   |                             |                | cross-sectional      |

| Study ID     | Identified through | Title                                                                                                                                                                                                                                                   | Journal                           | Country      | Study Design    | # of participants | # of data collection points | follow-up time | Reason for exclusion |
|--------------|--------------------|---------------------------------------------------------------------------------------------------------------------------------------------------------------------------------------------------------------------------------------------------------|-----------------------------------|--------------|-----------------|-------------------|-----------------------------|----------------|----------------------|
| Beguy 2015   | database           | Health & Demographic Surveillance System Profile: The Nairobi Urban Health and Demographic Surveillance System (NUHDSS)                                                                                                                                 | Int J Epidemiol                   | Kenya        | cross-sectional |                   |                             |                | cross-sectional      |
| Belyhun 2010 | database           | Prevalence and risk factors of wheeze and eczema in 1-year-old children: the Butajira birth cohort, Ethiopia.                                                                                                                                           | Clinical and experimental allergy | Ethiopia     | cross-sectional |                   |                             |                | cross-sectional      |
| Biccard 2012 | database           | What is the best pre-operative risk stratification tool for major adverse cardiac events following elective vascular surgery? A prospective observational cohort study evaluation pre-operative myocardial ischaemia monitoring and biomarker analysis. | Anaesthesia                       | South Africa | cross-sectional |                   |                             |                | cross-sectional      |

| Study ID     | Identified through | Title                                                                                                                                                                                                                                                   | Journal                                    | Country      | Study Design                            | # of participants | # of data collection points | follow-up time | Reason for exclusion |
|--------------|--------------------|---------------------------------------------------------------------------------------------------------------------------------------------------------------------------------------------------------------------------------------------------------|--------------------------------------------|--------------|-----------------------------------------|-------------------|-----------------------------|----------------|----------------------|
| Biccard 2012 | database           | What is the best pre-operative risk stratification tool for major adverse cardiac events following elective vascular surgery? A prospective observational cohort study evaluation pre-operative myocardial ischaemia monitoring and biomarker analysis. | Anaesthesia                                | South Africa | cross-sectional analysis of cohort data |                   |                             |                | cross-sectional      |
| Botha 2014   | database           | Associations of suPAR with lifestyle and cardiometabolic risk factors.                                                                                                                                                                                  | European journal of clinical investigation | South Africa | cross-sectional                         |                   |                             |                | cross-sectional      |
| Botha 2015   | database           | Soluble urokinase plasminogen activator receptor as prognostic marker of all-cause and cardiovascular mortality in a black population.                                                                                                                  | International journal of cardiology        | South Africa | cross-sectional                         |                   |                             |                | cross-sectional      |

| Study ID            | Identified through | Title                                                                                                                  | Journal                               | Country                                                              | Study Design                            | # of participants | # of data collection points | follow-up time | Reason for exclusion |
|---------------------|--------------------|------------------------------------------------------------------------------------------------------------------------|---------------------------------------|----------------------------------------------------------------------|-----------------------------------------|-------------------|-----------------------------|----------------|----------------------|
| Carrillo-Larco 2014 | database           | Short sleep duration and childhood obesity: cross-sectional analysis in Peru and patterns in four developing countries | PloS one                              | Ethiopia, India, Peru, Vietnam                                       | cross-sectional analysis of cohort data | <500              |                             |                | small                |
| Chalumeau 2002      | database           | Can clinical risk factors for late stillbirth in West Africa be detected during antenatal care or only during labour?  | International journal of epidemiology | Ivory Coast, Mali, Senegal, Niger, Mauritania, Burkina Faso, Senegal | cross-sectional                         |                   |                             |                | cross-sectional      |
| Chiolero 2011       | database           | Birth weight, weight change, and blood pressure during childhood and adolescence: a school-based multiple cohort study | J Hypertens                           | Seychelles                                                           | cross-sectional                         |                   |                             |                | cross-sectional      |
| Chirenda 2000       | database           | Association of HIV infection with the development of severe and complicated malaria cases at a                         | Cent Afr J Med                        | Zimbabwe                                                             | Prospective cohort                      | <500              |                             |                | small                |

| Study ID        | Identified through | Title                                                                                                                  | Journal                           | Country              | Study Design    | # of participants | # of data collection points | follow-up time | Reason for exclusion |
|-----------------|--------------------|------------------------------------------------------------------------------------------------------------------------|-----------------------------------|----------------------|-----------------|-------------------|-----------------------------|----------------|----------------------|
|                 |                    | rural hospital in Zimbabwe                                                                                             |                                   |                      |                 |                   |                             |                |                      |
| Chirwa 2014     | database           | Postnatal growth velocity and overweight in early adolescents: a comparison of rural and urban African boys and girls. | American journal of human biology | South Africa, Malawi | child cohorts   | <500              |                             |                | small                |
| Chokunonga 2011 | database           | Cancer survival in Harare, Zimbabwe, 1993-1997.                                                                        | IARC scientific publications      | Zimbabwe             | follow-up       | <500              |                             |                | small                |
| Clark 2015      | database           | Cardiometabolic disease risk and HIV status in rural South Africa: establishing a baseline                             | BMC public health                 | South Africa         | cross-sectional |                   |                             |                | cross-sectional      |
| Cois 2014       | database           | Analysing the socioeconomic determinants of hypertension in South Africa: a structural equation modelling approach.    | BMC public health                 | South Africa         | cross-sectional |                   |                             |                | cross-sectional      |
| Cooper 2015     | database           | Elevated hypertension risk for African-origin populations in                                                           | Journal of hypertension           | Ghana, South Africa, | cross-sectional |                   |                             |                | cross-sectional      |

| Study ID     | Identified through | Title                                                                                                                                                     | Journal                           | Country    | Study Design    | # of participants | # of data collection points | follow-up time | Reason for exclusion |
|--------------|--------------------|-----------------------------------------------------------------------------------------------------------------------------------------------------------|-----------------------------------|------------|-----------------|-------------------|-----------------------------|----------------|----------------------|
|              |                    | biracial societies: modeling the Epidemiologic Transition Study.                                                                                          |                                   | Seychelles |                 |                   |                             |                |                      |
| Crampin 2012 | database           | Profile: the Karonga Health and Demographic Surveillance System                                                                                           | Int J Epidemiol                   | Malawi     | cross-sectional |                   |                             |                | cross-sectional      |
| Damorou 2008 | database           | Cardiovascular emergencies and their morbimortality at the hospital. Report of 733 cases at the CHU campus in Lome (national reference hospital in Togo). | Mali medicine                     | Togo       | cross-sectional |                   |                             |                | cross-sectional      |
| Davey 2005   | database           | Wheeze, allergic sensitization and geohelminth infection in Butajira, Ethiopia.                                                                           | Clinical and experimental allergy | Ethiopia   | cross-sectional |                   |                             |                | cross-sectional      |
| Dawam 2000   | database           | Benign prostatic hyperplasia and prostate carcinoma in native Africans.                                                                                   | BJU international                 | Nigeria    | cross-sectional |                   |                             |                | cross-sectional      |
| Deckert 2017 | database           | Assessment of renal function in routine care of                                                                                                           | PloS one                          | Zambia     | cross-sectional |                   |                             |                | cross-sectional      |

| Study ID     | Identified through | Title                                                                                                                        | Journal                                             | Country      | Study Design    | # of participants | # of data collection points | follow-up time | Reason for exclusion    |
|--------------|--------------------|------------------------------------------------------------------------------------------------------------------------------|-----------------------------------------------------|--------------|-----------------|-------------------|-----------------------------|----------------|-------------------------|
|              |                    | people living with HIV on ART in a resource-limited setting in urban Zambia.                                                 |                                                     |              |                 |                   |                             |                |                         |
| Deckert 2017 | database           | Assessment of renal function in routine care of people living with HIV on ART in a resource-limited setting in urban Zambia. | PloS one                                            | Zambia       | cohort          | >500              | 1                           |                | 1 data collection point |
| Deeg 2008    | database           | A comparison of cardiovascular disease risk factor biomarkers in African Americans and Yoruba Nigerians                      | Ethnicity & disease                                 | USA, Nigeria |                 |                   |                             |                | international           |
| Denslow 2011 | database           | Bacterial vaginosis as a risk factor for high-grade cervical lesions and cancer in HIV-seropositive women.                   | International journal of gynaecology and obstetrics | South Africa | cross-sectional |                   |                             |                | cross-sectional         |
| Dolo 2003    | database           | Epidemiology of malaria in a village of Sudanese savannah in Mali                                                            |                                                     | Mali         | cross-sectional |                   |                             |                | cross-sectional         |



| Study ID   | Identified through | Title                                                                                                       | Journal                          | Country                                       | Study Design          | # of participants | # of data collection points | follow-up time | Reason for exclusion |
|------------|--------------------|-------------------------------------------------------------------------------------------------------------|----------------------------------|-----------------------------------------------|-----------------------|-------------------|-----------------------------|----------------|----------------------|
|            |                    | (Bancoumana).<br>Anti-TRAP and anti-CS humoral immunity response.                                           |                                  |                                               |                       |                   |                             |                |                      |
| Dorie 2015 | database           | Screening of cerebral vasculopathy in sickle cell anemia children using transcranial Doppler.               |                                  | Mali                                          | cross-sectional       |                   |                             |                | cross-sectional      |
| Dugas 2014 | database           | Comparisons of intensity-duration patterns of physical activity in the US, Jamaica and 3 African countries. | BMC public health                | Ghana, South Africa, Seychelles, Jamaica, USA |                       |                   |                             |                | international        |
| Duong 2013 | database           | Global differences in lung function by region (PURE): an international, community-based prospective study.  | The Lancet. Respiratory medicine | 17 countries                                  |                       |                   |                             |                | international        |
| E.Bah 2011 | database           | Cancer survival in the Gambia, 1993-1997.                                                                   | IARC scientific publications     | Gambia                                        | prospective follow-up | <500              |                             |                | small                |

| Study ID       | Identified through | Title                                                                                                                                                         | Journal                                              | Country                                                                                                                        | Study Design    | # of participants | # of data collection points | follow-up time | Reason for exclusion |
|----------------|--------------------|---------------------------------------------------------------------------------------------------------------------------------------------------------------|------------------------------------------------------|--------------------------------------------------------------------------------------------------------------------------------|-----------------|-------------------|-----------------------------|----------------|----------------------|
| El Imam 2006   | database           | Obstructive uropathy in Sudanese patients.                                                                                                                    | Saudi journal of kidney diseases and transplantation | Sudan                                                                                                                          | cross-sectional |                   |                             |                | cross-sectional      |
| Elsharif 2011  | database           | Mortality rate of patients with end stage renal disease on regular hemodialysis: a single center study.                                                       | Saudi journal of kidney diseases and transplantation | Sudan                                                                                                                          | cross-sectional |                   |                             |                | cross-sectional      |
| Emma-Okon 2014 | database           | Lipid profile in an apparently healthy Nigerian population.                                                                                                   | The Nigerian postgraduate medical journal            | Nigeria                                                                                                                        | cross-sectional |                   |                             |                | cross-sectional      |
| Ferrari 2015   | database           | Geographical variations in the prevalence and management of cardiovascular risk factors in outpatients with CAD: Data from the contemporary CLARIFY registry. | European journal of preventive cardiology            | Western/Central Europe, Canada/South Africa/Australia/UK, Eastern Europe, Central/South America, Middle East, East Asia, India |                 |                   |                             |                | international        |

| Study ID       | Identified through | Title                                                                                                                                                                                               | Journal                           | Country                      | Study Design                            | # of participants | # of data collection points | follow-up time | Reason for exclusion    |
|----------------|--------------------|-----------------------------------------------------------------------------------------------------------------------------------------------------------------------------------------------------|-----------------------------------|------------------------------|-----------------------------------------|-------------------|-----------------------------|----------------|-------------------------|
| Firnhaber 2016 | database           | Prospective One Year Follow Up of HIV Infected Women Screened for Cervical Cancer Using Visual Inspection with Acetic Acid, Cytology and Human Papillomavirus Testing in Johannesburg South Africa. | PloS one                          | South Africa                 | prospective follow-up                   | >500              | 1                           |                | 1 data collection point |
| Gatimu 2016    | database           | Prevalence and determinants of diabetes among older adults in Ghana                                                                                                                                 | BMC public health                 | Ghana                        | cross-sectional analysis of cohort data | <500              |                             |                | small                   |
| Geubbels 2015  | database           | Health & Demographic Surveillance System Profile: The Ifakara Rural and Urban Health and Demographic Surveillance System (Ifakara HDSS)                                                             | Int J Epidemiol                   | Tanzania                     | cross-sectional                         |                   |                             |                | cross-sectional         |
| Gildner 2014   | database           | Sleep duration, sleep quality, and obesity risk among older                                                                                                                                         | American journal of human biology | China, Ghana, India, Mexico, | international study                     |                   |                             |                | international           |

| Study ID       | Identified through | Title                                                                                                                                                                  | Journal                           | Country                                           | Study Design    | # of participants | # of data collection points | follow-up time | Reason for exclusion |
|----------------|--------------------|------------------------------------------------------------------------------------------------------------------------------------------------------------------------|-----------------------------------|---------------------------------------------------|-----------------|-------------------|-----------------------------|----------------|----------------------|
|                |                    | adults from six middle-income countries: findings from the study on global AGEing and adult health (SAGE).                                                             |                                   | Russia, South Africa                              |                 |                   |                             |                |                      |
| Gildner 2014   | database           | Sleep duration, sleep quality, and obesity risk among older adults from six middle-income countries: findings from the study on global AGEing and adult health (SAGE). | American journal of human biology | China, Ghana, India, Mexico, Russia, South Africa |                 |                   |                             |                | international        |
| Githinji 2017  | database           | Lung Function in South African Adolescents Infected Perinatally with HIV and Treated Long-Term with Antiretroviral Therapy                                             | Ann Am Thorac Soc                 | South Africa                                      | cross-sectional |                   |                             |                | cross-sectional      |
| Hambridge 2017 | database           | Anthropometric indices for non-pregnant women of childbearing age differ widely among four low-                                                                        | BMC public health                 | Equateur, Guatemala, India, Pakistan, Democratic  | cross-sectional |                   |                             |                | cross-sectional      |

| Study ID               | Identified through | Title                                                                                                                         | Journal                 | Country                                                                | Study Design                            | # of participants | # of data collection points | follow-up time | Reason for exclusion |
|------------------------|--------------------|-------------------------------------------------------------------------------------------------------------------------------|-------------------------|------------------------------------------------------------------------|-----------------------------------------|-------------------|-----------------------------|----------------|----------------------|
|                        |                    | middle income populations.                                                                                                    |                         | Republic of the Congo                                                  |                                         |                   |                             |                |                      |
| Hambridge 2017         | database           | Anthropometric indices for non-pregnant women of childbearing age differ widely among four low-middle income populations.     | BMC public health       | Equateur, Guatemala, India, Pakistan, Democratic Republic of the Congo |                                         |                   |                             |                | international        |
| Hennild 2016           | database           | Prevalence of impaired glucose tolerance and other types of dysglycaemia among young twins and singletons in Guinea-Bissau.   | BMC endocrine disorders | Guinea-Bissau                                                          | cross-sectional                         |                   |                             |                | cross-sectional      |
| Jean-Luc Gradidge 2016 | database           | Metabolic and Body Composition Risk Factors Associated with Metabolic Syndrome in a Cohort of Women with a High Prevalence of | PloS one                | South Africa                                                           | cross-sectional analysis of cohort data | <500              |                             |                | small                |

| Study ID                    | Identified through | Title                                                                                                                                 | Journal                        | Country      | Study Design           | # of participants | # of data collection points | follow-up time | Reason for exclusion |
|-----------------------------|--------------------|---------------------------------------------------------------------------------------------------------------------------------------|--------------------------------|--------------|------------------------|-------------------|-----------------------------|----------------|----------------------|
|                             |                    | Cardiometabolic Disease                                                                                                               |                                |              |                        |                   |                             |                |                      |
| Jinabhai 2005               | database           | Changing patterns of under- and over-nutrition in South African children-future risks of non-communicable diseases.                   | Annals of tropical paediatrics | South Africa | cross-sectional        |                   |                             |                | cross-sectional      |
| K.Ackoundou -N'Guessan 2014 | database           | Uncontrolled hypertension in chronic kidney disease in patients from black Africa admitted in a renal unit: a retrospective analysis. | Nephrology therapy             | Ivory Coast  | retrospective analysis | <500              |                             |                | small                |
| Kahn 2012                   | database           | Profile: Agincourt health and socio-demographic surveillance system                                                                   | Int J Epidemiol                | South Africa | cross-sectional        |                   |                             |                | cross-sectional      |
| Kayima 2015                 | database           | Determinants of hypertension in a young adult Ugandan population in                                                                   | BMC public health              | Uganda       | cross-sectional        |                   |                             |                | cross-sectional      |

| Study ID           | Identified through | Title                                                                                                                         | Journal                        | Country      | Study Design                            | # of participants | # of data collection points | follow-up time | Reason for exclusion    |
|--------------------|--------------------|-------------------------------------------------------------------------------------------------------------------------------|--------------------------------|--------------|-----------------------------------------|-------------------|-----------------------------|----------------|-------------------------|
|                    |                    | epidemiological transition-the MEPI-CVD survey.                                                                               |                                |              |                                         |                   |                             |                |                         |
| Kimbally-Kaky 2008 | database           | [Rheumatic heart disease in schoolchildren in Brazzaville].                                                                   |                                | Congo        | cross-sectional                         |                   |                             |                | cross-sectional         |
| Kisoli 2015        | database           | Levels of functional disability in elderly people in Tanzania with dementia, stroke and Parkinson's disease.                  | Acta neuropsychiatrica         | Tanzania     | cross-sectional                         |                   |                             |                | cross-sectional         |
| Lane 2003          | database           | Apolipoprotein E and mortality in African-Americans and Yoruba.                                                               | Journal of Alzheimer's disease | USA, Nigeria |                                         |                   |                             |                | international           |
| Makgae 2007        | database           | Somatotype and blood pressure of rural South African children aged 6-13 years: Ellisras longitudinal growth and health study. | Annals of human biology        | South Africa | cross-sectional analysis of cohort data | >500              | 1                           |                | 1 data collection point |
| Malete 2013        | database           | Body image and weight control in South Africans 15                                                                            | BMC Public Health              | South Africa | cross-sectional                         |                   |                             |                | cross-sectional         |

| Study ID     | Identified through | Title                                                                             | Journal                                                              | Country                                | Study Design                                   | # of participants | # of data collection points | follow-up time | Reason for exclusion |
|--------------|--------------------|-----------------------------------------------------------------------------------|----------------------------------------------------------------------|----------------------------------------|------------------------------------------------|-------------------|-----------------------------|----------------|----------------------|
|              |                    | years or older:<br>SANHANES-1                                                     |                                                                      |                                        |                                                |                   |                             |                |                      |
| Mancuso 2016 | database           | The contribution of rare variation to prostate cancer heritability.               | Nature genetics                                                      | Uganda                                 | cross-sectional                                |                   |                             |                | cross-sectional      |
| Ocheni 2008  |                    | Changing pattern of childhood malignancies in Eastern Nigeria.                    | West African journal of medicine                                     | Nigeria                                | retrospective analysis of longitudinal surveys | <500              |                             |                | small                |
| Onyango 2011 | database           | Post-partum weight change patterns in the WHO Multicentre Growth Reference Study. | Maternal & child nutrition                                           | Brazil, Ghana, India, Norway, Oman, US |                                                | <500              |                             |                | small                |
| Padalko 2015 | database           | Evaluation of the clinical significance of human papillomavirus (HPV) 53.         | European journal of obstetrics, gynecology, and reproductive biology | Belgium, DR Congo                      |                                                |                   |                             |                | international        |
| Patel 2005   | database           | Ischemic stroke in young HIV-positive patients in Kwazulu-Natal, South Africa.    | Neurology                                                            | South Africa                           | cohort study                                   | <500              |                             |                | small                |
| Pedro 2016   | database           | CardioBengo study protocol: a population based cardiovascular longitudinal study  | BMC public health                                                    | Angola                                 | protocol for cohort                            | <500              |                             |                | small                |



| Study ID             | Identified through | Title                                                                                                                                                                         | Journal  | Country | Study Design    | # of participants | # of data collection points | follow-up time | Reason for exclusion |
|----------------------|--------------------|-------------------------------------------------------------------------------------------------------------------------------------------------------------------------------|----------|---------|-----------------|-------------------|-----------------------------|----------------|----------------------|
|                      |                    | in Bengo Province, Angola.                                                                                                                                                    |          |         |                 |                   |                             |                |                      |
| Phillips-Howard 2014 | database           | Deaths ascribed to non-communicable diseases among rural Kenyan adults are proportionately increasing: evidence from a health and demographic surveillance system, 2003-2010. | PloS one | Kenya   | cross-sectional |                   |                             |                | cross-sectional      |
| Phillips-Howard 2014 | database           | Deaths ascribed to non-communicable diseases among rural Kenyan adults are proportionately increasing: evidence from a health and demographic surveillance system, 2003-2010. | PloS one | Kenya   | cross-sectional |                   |                             |                | cross-sectional      |

| Study ID      | Identified through | Title                                                                                                                                                     | Journal                          | Country                                       | Study Design                            | # of participants | # of data collection points | follow-up time | Reason for exclusion |
|---------------|--------------------|-----------------------------------------------------------------------------------------------------------------------------------------------------------|----------------------------------|-----------------------------------------------|-----------------------------------------|-------------------|-----------------------------|----------------|----------------------|
| Pieters 2010  | database           | Triglyceride concentration and waist circumference influence alcohol-related plasminogen activator inhibitor-1 activity increase in black South Africans. | Blood coagulation & fibrinolysis | South Africa                                  | cross-sectional analysis of cohort data | <500              |                             |                | small                |
| R.Cooper 2015 | database           | Elevated hypertension risk for African-origin populations in biracial societies: modeling the Epidemiologic Transition Study.                             | Journal of hypertension          | USA, Jamaica, Ghana, South Africa, Seychelles | cross-sectional analysis of cohort data | <500              |                             |                | small                |
| Raji 2017     | database           | Awareness of hypertension and its impact on blood pressure control among elderly nigerians: report from the Ibadan study of aging.                        | The Pan African medical journal  | Nigeria                                       | community-based cohort                  | <500              |                             |                | small                |

| Study ID       | Identified through | Title                                                                                                                                                          | Journal                                                           | Country      | Study Design                                  | # of participants | # of data collection points | follow-up time | Reason for exclusion    |
|----------------|--------------------|----------------------------------------------------------------------------------------------------------------------------------------------------------------|-------------------------------------------------------------------|--------------|-----------------------------------------------|-------------------|-----------------------------|----------------|-------------------------|
| Ramoshaba 2016 | database           | Components of Height and Blood Pressure among Ellirras Rural Children: Ellirras Longitudinal Study.                                                            | International journal of environmental research and public health | South Africa | cross-sectional analysis of longitudinal data | >500              | 1                           |                | 1 data collection point |
| Rice 2006      | database           | Meta-analysis of genome-wide scans for blood pressure in African American and Nigerian samples. The National Heart, Lung, and Blood Institute GenLink Project. | American journal of hypertension                                  | Nigeria, USA | cross-sectional                               |                   |                             |                | cross-sectional         |
| S.Abebe 2016   | database           | Diabetes mellitus among HIV-infected individuals in follow-up care at University of Gondar Hospital, Northwest Ethiopia.                                       | BMJ open                                                          | Ethiopia     | cross-sectional                               |                   |                             |                | cross-sectional         |
| S.Abera 2017   | database           | Social determinants of adult mortality from non-communicable diseases in                                                                                       | PloS one                                                          | Ethiopia     | cross-sectional                               |                   |                             |                | cross-sectional         |

| Study ID      | Identified through | Title                                                                                                                                                              | Journal                         | Country                     | Study Design             | # of participants | # of data collection points | follow-up time | Reason for exclusion |
|---------------|--------------------|--------------------------------------------------------------------------------------------------------------------------------------------------------------------|---------------------------------|-----------------------------|--------------------------|-------------------|-----------------------------|----------------|----------------------|
|               |                    | northern Ethiopia, 2009-2015: Evidence from health and demographic surveillance site.                                                                              |                                 |                             |                          |                   |                             |                |                      |
| Safaeian 2007 | database           | Comparability of self-collected vaginal swabs and physician-collected cervical swabs for detection of human papillomavirus infections in Rakai, Uganda.            | Sexually transmitted infections | Uganda                      | cross-sectional          |                   |                             |                | cross-sectional      |
| Schwartz 2009 | database           | Global meta-analysis of the C-11377G alteration in the ADIPOQ gene indicates the presence of population-specific effects: challenge for global health initiatives. | The pharmacogenomics journal    | South Africa, Cuba, Germany | meta-analysis of cohorts | <500              |                             |                | small                |
| Sliwa 2008    | database           | Spectrum of heart disease and risk factors in a black urban                                                                                                        | Lancet                          | South Africa                | cross-sectional          |                   |                             |                | cross-sectional      |

| Study ID     | Identified through | Title                                                                                                                                                                       | Journal                                       | Country      | Study Design                   | # of participants | # of data collection points | follow-up time | Reason for exclusion    |
|--------------|--------------------|-----------------------------------------------------------------------------------------------------------------------------------------------------------------------------|-----------------------------------------------|--------------|--------------------------------|-------------------|-----------------------------|----------------|-------------------------|
|              |                    | population in South Africa (the Heart of Soweto Study): a cohort study.                                                                                                     |                                               |              |                                |                   |                             |                |                         |
| Sliwa 2012   | database           | Different lipid profiles according to ethnicity in the Heart of Soweto study cohort of de novo presentations of heart disease.                                              | Cardiovascular journal of Africa              | South Africa | cross-sectional                |                   |                             |                | cross-sectional         |
| Sliwa 2012   | database           | Contribution of the human immunodeficiency virus/acquired immunodeficiency syndrome epidemic to de novo presentations of heart disease in the Heart of Soweto Study cohort. | European heart journal cardiovascular Imaging | South Africa | prospective, clinical registry | >500              | 1                           |                | 1 data collection point |
| Stewart 2008 | database           | Predominance of heart failure in the Heart of Soweto Study cohort: emerging challenges for                                                                                  | Circulation                                   | South Africa | prospective, clinical registry | >500              | 1                           |                | 1 data collection point |

| Study ID      | Identified through | Title                                                                                                                                                                 | Journal                | Country      | Study Design                   | # of participants | # of data collection points | follow-up time | Reason for exclusion    |
|---------------|--------------------|-----------------------------------------------------------------------------------------------------------------------------------------------------------------------|------------------------|--------------|--------------------------------|-------------------|-----------------------------|----------------|-------------------------|
|               |                    | urban African communities.                                                                                                                                            |                        |              |                                |                   |                             |                |                         |
| Stewart 2011  | database           | Standing at the crossroads between new and historically prevalent heart disease: effects of migration and socio-economic factors in the Heart of Soweto cohort study. | European Heart journal | South Africa | prospective, clinical registry | >500              | 1                           |                | 1 data collection point |
| Stewart 2011b | database           | The clinical consequences and challenges of hypertension in urban-dwelling black Africans: insights from the Heart of Soweto Study.                                   |                        | South Africa | prospective, clinical registry | >500              | 1                           |                | 1 data collection point |
| Stewart 2011c | database           | A not-so-rare form of heart failure in urban black Africans: pathways to right heart failure in the Heart of Soweto Study cohort.                                     |                        | South Africa | prospective, clinical registry | >500              | 1                           |                | 1 data collection point |

| Study ID           | Identified through | Title                                                                                                               | Journal                             | Country                                             | Study Design                    | # of participants | # of data collection points | follow-up time | Reason for exclusion |
|--------------------|--------------------|---------------------------------------------------------------------------------------------------------------------|-------------------------------------|-----------------------------------------------------|---------------------------------|-------------------|-----------------------------|----------------|----------------------|
| Urena-Torres 2011  | database           | Association of kidney function, vitamin D deficiency, and circulating markers of mineral and bone disorders in CKD. | American journal of kidney diseases | Sudan                                               | cross-sectional                 |                   |                             |                | cross-sectional      |
| van der Sande 2001 | database           | Geographical variation in prevalence of hypertension within The Gambia.                                             | Journal of human hypertension       | The Gambia                                          | follow-up study                 | <500              |                             |                |                      |
| Victoria 2008      | database           | Maternal and child undernutrition: consequences for adult health and human capital.                                 | Lancet                              | Brazil, Guatemala, India, Philippines, South Africa | analysis of prospective cohorts | <500              |                             |                |                      |

STable 4a: Characteristics of included studies with only children and young adults aged <20 years, sampled from general populations

| Name of cohort and reference | Mandela's children: The 1990 Birth to Twenty Cohort (BT20)[18]–[35]                                          | Seychelles Child Development Study[36]–[40]                                                                                                                                                  | The Lungwena Child Survival Study [32],[41]–[45]                                                                                                                                                                                                                                    |
|------------------------------|--------------------------------------------------------------------------------------------------------------|----------------------------------------------------------------------------------------------------------------------------------------------------------------------------------------------|-------------------------------------------------------------------------------------------------------------------------------------------------------------------------------------------------------------------------------------------------------------------------------------|
| Country                      | South Africa                                                                                                 | Seychelles                                                                                                                                                                                   | Malawi                                                                                                                                                                                                                                                                              |
| Study design                 | birth cohort                                                                                                 | cohort study                                                                                                                                                                                 | birth cohort                                                                                                                                                                                                                                                                        |
| Start date                   | 1990                                                                                                         | 1989                                                                                                                                                                                         | 1995                                                                                                                                                                                                                                                                                |
| Total duration of study      | 28yrs                                                                                                        | 20yrs                                                                                                                                                                                        | 23yrs                                                                                                                                                                                                                                                                               |
| # of data collection points  | 15                                                                                                           | ≥4                                                                                                                                                                                           | 3                                                                                                                                                                                                                                                                                   |
| Main focus                   | child development                                                                                            | selected by MOH to focus on four important stages in development                                                                                                                             | child survival                                                                                                                                                                                                                                                                      |
| Funding of study             | Wellcome Trust, University of Witwatersrand, South African MRC, South African Human Science Research Council | McCabe Fund of the University of Pennsylvania, Rotary Club of Victoria, NIH, MOH of Seychelles, National Institutes of Environmental health Sciences, National Centre for Research Resources | Academy of Finland, the Emil Aaltonen Foundation, the Foundation for Paediatric Research in Finland, the Medical Research Fund of Tampere University Hospital, the Research Foundation of Mannerheim League for Child Welfare, the Research Foundation of the University of Tampere |
| Stored samples               | DNA (n=2200 child samples; 2200 one biological parent)                                                       | none reported                                                                                                                                                                                | none reported                                                                                                                                                                                                                                                                       |
| Potential for data access?   | No                                                                                                           | not reported                                                                                                                                                                                 | not reported                                                                                                                                                                                                                                                                        |

MRC: Medical Research Council; NIH: National Institutes of Health; MOH: Ministry of Health



STable 4b: Characteristics of included studies with mixed (children and adults) populations, sampled from general and from clinical populations

| Name of cohort and reference | Rakai Community Cohort Study (RCCS)[47]–[50]                                                                                                                                                                                                      | Kiang West Longitudinal Population Study[51]–[53]                                                                        | The General Population Cohort (GPC)[49],[54]–[57] | Bukavu Observ Study [58]–[59]    | Ellisras Longitudinal Study [62]–[66]                                                                                                                     | Mildmay Uganda Cohort[67],[68]                                                                               | Prospective cohort study in Sudan[69]              |
|------------------------------|---------------------------------------------------------------------------------------------------------------------------------------------------------------------------------------------------------------------------------------------------|--------------------------------------------------------------------------------------------------------------------------|---------------------------------------------------|----------------------------------|-----------------------------------------------------------------------------------------------------------------------------------------------------------|--------------------------------------------------------------------------------------------------------------|----------------------------------------------------|
| Country                      | Uganda                                                                                                                                                                                                                                            | Gambia                                                                                                                   | Uganda                                            | DR Congo                         | South Africa                                                                                                                                              | Uganda                                                                                                       | Sudan                                              |
| Study design                 | open, population-based cohort                                                                                                                                                                                                                     | longitudinal study                                                                                                       | community-based open cohort                       | observational cohort             | longitudinal study                                                                                                                                        | clinical cohort                                                                                              | longitudinal surveys                               |
| Start date                   | 1994                                                                                                                                                                                                                                              | 1980 (biobank 2012)                                                                                                      | 1989                                              | 2012                             | 1996                                                                                                                                                      | 2004                                                                                                         | 2009                                               |
| Total duration of study      | 11yrs                                                                                                                                                                                                                                             | 38yrs                                                                                                                    | 22yrs                                             | 3yrs                             | 7rs                                                                                                                                                       | 7yrs                                                                                                         | 15mo                                               |
| # of data collection points  | 11                                                                                                                                                                                                                                                | ≥12                                                                                                                      | 22                                                | 3                                | 13                                                                                                                                                        | ~42                                                                                                          | 2                                                  |
| Main focus                   | HIV incidence                                                                                                                                                                                                                                     | life-course longitudinal nutritional and health phenotypes; integrated within Kiang West DSS, KEMRes, and Keneba Biobank | HIV, NCDs, genetics                               | prevalence of NCDs               | growth and health                                                                                                                                         | to monitor clinical care and outcomes of HIV among patients on treatment                                     | to evaluate the survival of haemodialysis patients |
| Funding of study             | National Institute of Mental Health, National Institute of Allergy and Infectious Diseases, National Institute of Child Health and Development, National Institute for Allergy and Infectious Diseases Division of Intramural Research, NIH, Bill | MRC UK, UK Department for International Development                                                                      | MRC UK, Wellcome Trust                            | Flemish Inter-University Council | VU University Medical Centre, University of Limpopo South Africa, National Research Foundation, MRC of South Africa, University of the North South Africa | Canadian Institutes for Health Research, Grand Challenges Canada, President's Emergency Plan for AIDS Relief | not reported                                       |

| Name of cohort and reference | Rakai Community Cohort Study (RCCS)[47]–[50]                                 | Kiang West Longitudinal Population Study[51]–[53]                                         | The General Population Cohort (GPC)[49],[54]–[57]                                                | Bukavu Observ Study [58]–[59] | Ellisras Longitudinal Study [62]–[66] | Mildmay Uganda Cohort[67],[68] | Prospective cohort study in Sudan[69] |
|------------------------------|------------------------------------------------------------------------------|-------------------------------------------------------------------------------------------|--------------------------------------------------------------------------------------------------|-------------------------------|---------------------------------------|--------------------------------|---------------------------------------|
|                              | & Melinda Gates Foundation, John Hopkins University Centre for AIDS Research |                                                                                           |                                                                                                  |                               |                                       |                                |                                       |
| Stored samples               | <b>venous blood samples</b> and <b>archived serum samples</b> stored at -70C | <b>DNA</b> extracted in 2002-2003 using standard salting-out method according to DNA Bank | <b>DNA</b> extracted from serum samples (available for 8000) venous blood samples stored at -80C | none reported                 | none reported                         | none reported                  | none reported                         |
| Potential for data access?   | yes                                                                          | yes                                                                                       | yes                                                                                              | yes                           | not reported                          | yes                            | not reported                          |

DSS: Demographic Surveillance Site; KEMRes: Keneba Electronical Medical Records System; MRC: Medical Research Council; NIH: National Institutes of Health

STable 4c: Characteristics of included studies with only adults aged >18 yrs, sampled from general populations

| Name of cohort and reference | African Collaborative Centre for Microbiome and Genomics Research's (ACCME's) HPV and Cervical Cancer Study[70] | Africa Wits-INDEPTH partnership for Genomic Studies (AWI-Gen)[71],[72]                              | Health and Aging in Africa: a Longitudinal Study of an INDEPTH Community in South Africa (HAALSI)[73]–[75] | Non-Communicable Disease Intervention Programme[76]–[83] | Dar es Salaam Urban Cohort Hypertension Study (DUCS-HTN)[84]                                        | Ibadan Study of Aging[85]–[88]                | Prospective Cohort in Democratic Republic of Congo[89] | The Benin Study[90],[91]                  |
|------------------------------|-----------------------------------------------------------------------------------------------------------------|-----------------------------------------------------------------------------------------------------|------------------------------------------------------------------------------------------------------------|----------------------------------------------------------|-----------------------------------------------------------------------------------------------------|-----------------------------------------------|--------------------------------------------------------|-------------------------------------------|
| Country                      | Nigeria                                                                                                         | Burkina Faso, Ghana, Kenya, South Africa                                                            | South Africa                                                                                               | Mauritius                                                | Tanzania                                                                                            | Nigeria                                       | DR Congo                                               | Benin                                     |
| Study design                 | cohort study                                                                                                    | longitudinal study                                                                                  | population-based longitudinal cohort                                                                       | longitudinal population-based surveys                    | cohort study                                                                                        | community-based cohort                        | prospective cohort                                     | longitudinal observational study          |
| Start date                   | 2014                                                                                                            | 2013                                                                                                | 2014                                                                                                       | 1987                                                     | 2014                                                                                                | 2003                                          | 2004                                                   | 2005                                      |
| Total duration of study      | 24mo                                                                                                            | 5yrs                                                                                                | 4yrs                                                                                                       | 11yrs                                                    | 1yr                                                                                                 | 4yrs                                          | 4yrs                                                   | 5yrs                                      |
| # of data collection points  | 5                                                                                                               | 1 (next planned in 2019)                                                                            | ≥8                                                                                                         | 3                                                        | 2                                                                                                   | 2                                             | 8                                                      | 3                                         |
| Main focus                   | environmental, microbiomic, genetic and epigenetic factors associated with persistent HPV infection             | genetic and environmental factors that contribute to cardiometabolic disease in African populations | CVDs, HIV, cognitive function and dementia                                                                 | NCD intervention                                         | prevalence, risk factors, and barriers to diagnosis and treatment for hypertension in Dar es Salaam | functioning and disability of elderly persons | type 2 diabetes incidence                              | evolution of cardiometabolic risk         |
| Funding of study             | NIH                                                                                                             | NIH                                                                                                 | National Institute on Aging                                                                                | US NIH                                                   | Centre for Global Demography of Ageing                                                              | Wellcome Trust                                | LOMO Medical Clinic, Regional Office of WHO for Africa | Canadian International Development Agency |

|                                     |                                                                                                                                                                                                    |                                                                               |                                                                                                                   |                                                                 |                                                                     |                                       |                                                               |                                 |
|-------------------------------------|----------------------------------------------------------------------------------------------------------------------------------------------------------------------------------------------------|-------------------------------------------------------------------------------|-------------------------------------------------------------------------------------------------------------------|-----------------------------------------------------------------|---------------------------------------------------------------------|---------------------------------------|---------------------------------------------------------------|---------------------------------|
| <b>Name of cohort and reference</b> | <b>African Collaborative Centre for Microbiome and Genomics Research's (ACCME's) HPV and Cervical Cancer Study[70]</b>                                                                             | <b>Africa Wits-INDEPTH partnership for Genomic Studies (AWI-Gen)[71],[72]</b> | <b>Health and Aging in Africa: a Longitudinal Study of an INDEPTH Community in South Africa (HAALSI)[73]–[75]</b> | <b>Non-Communicable Disease Intervention Programme[76]–[83]</b> | <b>Dar es Salaam Urban Cohort Hypertension Study (DUCS-HTN)[84]</b> | <b>Ibadan Study of Aging[85]–[88]</b> | <b>Prospective Cohort in Democratic Republic of Congo[89]</b> | <b>The Benin Study[90],[91]</b> |
| <b>Stored samples</b>               | <b>cervical biopsy</b> samples stored as fresh frozen and paraffin embedded;<br><b>venous blood samples</b> separated into plasma, serum, buffy coat, red blood cells, and clot and stored at -80C | <b>serum, plasma, urine aliquots</b> frozen at -80C                           | none reported                                                                                                     | none reported                                                   | none reported                                                       | none reported                         | none reported                                                 | none reported                   |
| <b>Potential for data access?</b>   |                                                                                                                                                                                                    | yes                                                                           | yes                                                                                                               | not reported                                                    | not reported                                                        | yes                                   | not reported                                                  | not reported                    |

NIH: National Institute of Health; CVD: Cardiovascular Diseases

STable 4d: Characteristics of included studies with only adults aged >18yrs, sampled from occupational and clinical populations

| Name of cohort and reference | Basotho Gold Miners Cohort[92],[93] | Themba Lethu Clinical (TLC) Cohort Study[94],[95]                      | Cohort of HIV-infected, ART-naïve adults[96],[97]                                       | Operational cohort of treatment naïve HIV-infected men and women[98],[99]                                           | Prospective cohort of nulliparous women[100],[101]         | The African Breast Cancer Disparities in Outcomes (ABC-DO) Study[102],[103]                                                                         | HPV in Africa Research Partnership (HARP) Study[104]–[106]                     | The Complications of Long-Term Antiretroviral Therapy among HIV-positive Ugandan adults (CoLTART) study[107]–[109] |
|------------------------------|-------------------------------------|------------------------------------------------------------------------|-----------------------------------------------------------------------------------------|---------------------------------------------------------------------------------------------------------------------|------------------------------------------------------------|-----------------------------------------------------------------------------------------------------------------------------------------------------|--------------------------------------------------------------------------------|--------------------------------------------------------------------------------------------------------------------|
| Country                      | Lesotho                             | South Africa                                                           | Zambia                                                                                  | South Africa                                                                                                        | Nigeria                                                    | Namibia, Nigeria, South Africa, Uganda, Zambia                                                                                                      | Burkina Faso, South Africa                                                     | Uganda                                                                                                             |
| Study design                 | occupational cohort study           | clinical cohort study                                                  | clinical cohort study                                                                   | clinical cohort study                                                                                               | prospective clinical cohort                                | prospective hospital-based study                                                                                                                    | prospective clinical cohort                                                    | prospective clinical cohort                                                                                        |
| Start date                   | 1999                                | 2004                                                                   | 2004                                                                                    | 2003                                                                                                                | 2006                                                       | 2014                                                                                                                                                | 2011                                                                           | 2013                                                                                                               |
| Total duration of study      | 1yr                                 | 14yrs                                                                  | 3yrs                                                                                    | 8yrs                                                                                                                | 3yrs                                                       | 3yrs                                                                                                                                                | 18mo                                                                           | 18mo                                                                                                               |
| # of data collection points  | 2                                   | ≥14                                                                    | 2                                                                                       | ≥15                                                                                                                 | 2                                                          | 9                                                                                                                                                   | ≥2                                                                             | 3                                                                                                                  |
| Main focus                   | health of gold miners               | HIV                                                                    | effects of ART                                                                          | a wellness clinic, which has provided pre-antiretroviral therapy care and support for HIV-infected adults in Soweto | health outcomes of pregnant women                          | overall survival, impact on quality of life, and delays along the journey from symptom discovery to diagnosis and treatment of breast cancer in SSA | evaluation of cervical cancer screening approaches among women living with HIV | platform for studying the complications of long-term ART among Ugandan HIV-positive adults                         |
| Funding of study             | AngloGold Corporation               | USAID, National Institute of Allergy and Infectious Diseases, National | Elizabeth Glaser Paediatric AIDS Foundation from the US Centres for Disease Control and | USAID South Africa                                                                                                  | Gates Institute of the Johns Hopkins University, MacArthur | Susan G Komen for the Cure Foundation, IARC                                                                                                         | European Commission 7th Framework Programme                                    | UK MRC, UK Department for International Development                                                                |

| Name of cohort and reference | Basotho Gold Miners Cohort[92],[93] | Themba Lethu Clinical (TLC) Cohort Study[94],[95]                                                               | Cohort of HIV-infected, ART-naïve adults[96],[97]                                                                | Operational cohort of treatment naïve HIV-infected men and women[98],[99] | Prospective cohort of nulliparous women[100],[101] | The African Breast Cancer Disparities in Outcomes (ABC-DO) Study[102],[103] | HPV in Africa Research Partnership (HARP) Study[104]–[106] | The Complications of Long-Term Antiretroviral Therapy among HIV-positive Ugandan adults (CoLTART) study[107]–[109] |
|------------------------------|-------------------------------------|-----------------------------------------------------------------------------------------------------------------|------------------------------------------------------------------------------------------------------------------|---------------------------------------------------------------------------|----------------------------------------------------|-----------------------------------------------------------------------------|------------------------------------------------------------|--------------------------------------------------------------------------------------------------------------------|
|                              |                                     | Institute of Child Health and Development, South African Mission of the US Agency for International Development | Prevention, Doris Duke Charitable Foundations, NIH, University of Alabama at Birmingham Centre for AIDS Research |                                                                           | Multidisciplinary Resarch grant                    |                                                                             |                                                            |                                                                                                                    |
| Stored samples               | none reported                       | none reported                                                                                                   | none reported                                                                                                    | none reported                                                             | none reported                                      | formalin-fixed paraffin embedded tumour blocks                              | none reported                                              | <b>whole blood</b> for genomics studies stored at -80C                                                             |
| Potential for data access?   | yes                                 | yes                                                                                                             | not reported                                                                                                     | yes                                                                       | not reported                                       | yes                                                                         | not reported                                               | yes                                                                                                                |

NIH: National Institute of Health; MRC: Medical Research Council; IARC: International Agency for Research on Cancer; ART: antiretroviral therapy; WIHS: Women’s Interagency HIV Study

STable 4d continued: Characteristics of included studies with only adults aged >18yrs, sampled from occupational and clinical populations

| Name of cohort and reference | Prospective cohort study in Ghana[110]                                                                                             | Rwanda Women's Interassociation Study and Assessment (RWISA)[111]–[114]                                                                   | Prospective cohort study in Benin[115]  | Uganda AIDS Rural Treatment Outcomes (UARTO) cohort[116]–[118]                                                     |
|------------------------------|------------------------------------------------------------------------------------------------------------------------------------|-------------------------------------------------------------------------------------------------------------------------------------------|-----------------------------------------|--------------------------------------------------------------------------------------------------------------------|
| Country                      | Ghana                                                                                                                              | Rwanda                                                                                                                                    | Benin                                   | Uganda                                                                                                             |
| Study design                 | prospective clinical cohort                                                                                                        | observational prospective clinical cohort                                                                                                 | prospective clinical cohort             | population-based prospective cohort                                                                                |
| Start date                   | 2012                                                                                                                               | 2005                                                                                                                                      | not reported                            | 2005                                                                                                               |
| Total duration of study      | 2yrs                                                                                                                               | 13yrs                                                                                                                                     | 1yr                                     | 10yrs                                                                                                              |
| # of data collection points  | 2                                                                                                                                  | 26                                                                                                                                        | 5                                       | ≥2                                                                                                                 |
| Main focus                   | perinatal outcomes of women with pregnancies complicated by pregnancy-induced hypertension, chronic hypertension and pre-eclampsia | effectiveness and toxicity of ART                                                                                                         | contrasting post-partum health of women | effects of ART                                                                                                     |
| Funding of study             | Ridge Regional Hospital Out Patient Clinic, Maamobi General Hospital                                                               | National Institute of Allergy and Infectious Diseases, NIH, National Institute of Diabetes and Digestive and Kidney Disease, Chicago WIHS | WHO                                     | NIH, Doris Duke Charitable Foundation, the Sullivan Family Foundation, the Canada-Africa Prevention Trials network |
| Stored samples               | none reported                                                                                                                      | none reported                                                                                                                             | none reported                           | none reported                                                                                                      |
| Potential for data access?   | not reported                                                                                                                       | no                                                                                                                                        | not reported                            | not reported                                                                                                       |

NIH: National Institute of Health

STable 5a: Participant characteristics of included studies with children and young adults aged <20 years, sampled from general populations

| Name of cohort                       | Birth to Twenty                                                                                                                 | Seychelles Child Development Study                                                          | The Lungwena Child Survival Study                           |
|--------------------------------------|---------------------------------------------------------------------------------------------------------------------------------|---------------------------------------------------------------------------------------------|-------------------------------------------------------------|
| Sampling frame                       | general                                                                                                                         | public and private schools                                                                  | general                                                     |
| Inclusion criteria                   | included all singletons born to women resident in Soweto-Johannesburg during 7wk enrolment period ( $\geq 6$ wks spent in area) | included all children in four grades attending all public and private schools of Seychelles | included live-born singleton offspring of a cohort of women |
| Subject flow (# eligible # enrolled) | eligible 5449<br>enrolled 3273                                                                                                  | eligible 933<br>enrolled 779                                                                | eligible 795<br>enrolled 729                                |
| Sample size at final evaluation      | 6291                                                                                                                            | 549                                                                                         | 314                                                         |
| Age (mean)                           | birth-18yrs                                                                                                                     | 6mo - 20yrs                                                                                 | birth-17yrs                                                 |
| Possible to stratify on age?         | yes                                                                                                                             | yes                                                                                         | yes                                                         |
| Sex (%)                              | males (48)<br>females (52)                                                                                                      | males (48)<br>females (52)                                                                  | males (58)<br>females (42)                                  |
| Race/ethnicity                       | African (78)<br>White (6)<br>Coloured (12)<br>Indian (4)                                                                        | not reported                                                                                | mostly Islamic                                              |
| Rural/urban location (%)             | urban (100)                                                                                                                     | not reported                                                                                | rural (100)                                                 |
| Comparison groups                    | hypertensive (124) vs non-hypertensive (714)                                                                                    | none reported                                                                               | stunted at 12mo (71%) vs not stunted at 12mo (29%)          |



STable 5b: Participant characteristics of included studies with mixed (children and adults) populations, sampled from general and clinical populations

| Name of cohort                       | RCCS                                                                                                                       | Kiang West Longitudinal Population Study                  | The General Population Cohort                                        | Bukavu Observ Study             | Ellisras Longitudinal Study             | Mildmay Uganda Cohort                                                           | Prospective cohort study in Sudan                       |
|--------------------------------------|----------------------------------------------------------------------------------------------------------------------------|-----------------------------------------------------------|----------------------------------------------------------------------|---------------------------------|-----------------------------------------|---------------------------------------------------------------------------------|---------------------------------------------------------|
| Sampling frame                       | general population                                                                                                         | residents across 36 villages within rural Kiang West HDSS | general population                                                   | general population              | 22 schools (10 pre-schools, 12 primary) | all patients who initiated combination ART at Mug                               | patients at haemodialysis centres in Khartoum           |
| Inclusion criteria                   | included all individuals aged 15-49yrs residing for ≥6mo in agrarian and trading communities, 1mo intention to stay longer | not reported                                              | included individuals residing ≥3mo within study area and aged ≥13yrs | all adults asked to participate | not reported                            | included patients beginning therapy at 13yrs with ≥ 2 BP measurements available | included all patients on haemodialysis in these centres |
| Subject flow (# eligible # enrolled) | eligible 53933 enrolled 33438                                                                                              | eligible not reported enrolled 14000 (biobank 9000)       | eligible 11018 enrolled 7725                                         | eligible 4345 enrolled 4237     | eligible not reported enrolled 2225     | eligible 8835 enrolled 5563                                                     | eligible 2072 enrolled 1011                             |
| Sample size at final evaluation      | 17119                                                                                                                      | 14846                                                     | 7830                                                                 | 3962                            | 771                                     | 5563                                                                            | 967                                                     |
| Age (mean)                           | 15-49yrs (23)                                                                                                              | 5-50yrs                                                   | ≥13yrs (44)                                                          | ≥15yrs (34)                     | 3-28yrs                                 | ≥13yrs (35)                                                                     | 6-95 (45)                                               |
| Possible to stratify on age?         | yes                                                                                                                        | yes                                                       | yes                                                                  | yes                             | yes                                     | yes                                                                             | no                                                      |
| Sex (%)                              | males (46) females (54)                                                                                                    | males (43) females (57)                                   | males (44) females (56)                                              | males (44) females (56)         | males (52) females (48)                 | males (33) females (67)                                                         | males (567) females (33)                                |
| Race/ethnicity                       | not reported                                                                                                               | Mandinka (80) Fula (16) Jola (2) Other (3)                | Muganda (75) Rwandese/Burundi (19) Other (6)                         | not reported                    | not reported                            | not reported                                                                    | not reported                                            |
| Rural/urban location (%)             | rural (84) urban (16)                                                                                                      | rural (100)                                               | rural (100)                                                          | rural (100)                     | rural (100)                             | not reported                                                                    | not reported                                            |

| Name of cohort    | RCCS                                   | Kiang West Longitudinal Population Study | The General Population Cohort       | Bukavu Observ Study                                                           | Ellisras Longitudinal Study | Mildmay Uganda Cohort | Prospective cohort study in Sudan |
|-------------------|----------------------------------------|------------------------------------------|-------------------------------------|-------------------------------------------------------------------------------|-----------------------------|-----------------------|-----------------------------------|
| Comparison groups | HIV+ (3488) vs HIV $\emptyset$ (13361) | none reported                            | low HDL (5285) vs normal HDL (2101) | malnourished (269) vs normal weight (3003) vs overweight (551) vs obese (139) | none reported               | none reported         | adults (968) vs paediatrics (43)  |

HDSS: Health & Demographic Surveillance System; HIV  $\emptyset$ : HIV negative; ART: antiretroviral therapy; MUG: Mildmay Uganda Clinic; BP: blood pressure

STable 5c: Participant characteristics of included studies with only adults aged >18 yrs, sampled from general populations

| Name of cohort                       | ACCME's HPV and Cervical Cancer Study                                                                                                                                       | AWI-Gen                                                                                                                                    | HAALSI                                                                                    | NCD Intervention Programme                               | DUCS-HTN                                                           | Ibadan Study of Aging             | Prospective Cohort in DRC                                                         | The Benin Study                                          |
|--------------------------------------|-----------------------------------------------------------------------------------------------------------------------------------------------------------------------------|--------------------------------------------------------------------------------------------------------------------------------------------|-------------------------------------------------------------------------------------------|----------------------------------------------------------|--------------------------------------------------------------------|-----------------------------------|-----------------------------------------------------------------------------------|----------------------------------------------------------|
| Sampling frame                       | 42 districts in Abuja                                                                                                                                                       | six INDEPTH member HDSS centres                                                                                                            | adults in Agincourt HDSS                                                                  | 10 geographically defined areas                          | seven neighbourhoods within HDSS                                   | general population                | drawn from cross-sectional study                                                  | Cotonou, Ouidah                                          |
| Inclusion criteria                   | included females ≥18yrs, history of sexual intercourse, no previous history of cervical abnormalities, cervical cancer or total abdominal hysterectomy; excluded HIV+ women | included unrelated participants 40-60yrs resident in areas served by the HDSS centres; excluded pregnant women, recent immigrants (<10yrs) | included ≥40yrs, permanently living in the study site for 12mo preceding 2013 HDSS census | included all adults 25-74yrs living within defined areas | included HDSS participants ≥40yrs, living in 1 of 2 neighbourhoods | included ≥65yrs, fluent in Yoruba | excluded participants ≤40yrs, cases of known diabetes, insufficient baseline data | excluded prior diagnosis of hypertension, diabetes, CVDs |
| Subject flow (# eligible # enrolled) | eligible not reported<br>enrolled 11400                                                                                                                                     | eligible not reported<br>enrolled 10696                                                                                                    | eligible 12872<br>enrolled 6281                                                           | eligible 5910<br>enrolled 5083                           | eligible 4896<br>enrolled 2290                                     | eligible 2900<br>enrolled 2152    | eligible 960<br>enrolled 807                                                      | eligible not reported<br>enrolled 541                    |
| Sample size at final evaluation      | 5349                                                                                                                                                                        | not reported                                                                                                                               | 5059                                                                                      | 6291                                                     | 1752                                                               | 1330                              | not reported                                                                      | 416                                                      |
| Age (mean)                           | ≥18yrs (39)                                                                                                                                                                 | 40-60yrs (50)                                                                                                                              | ≥40yrs (62)                                                                               | 25-74yrs (43)                                            | ≥40yrs (51)                                                        | ≥65yrs (77)                       | >40yrs                                                                            | 24-60yrs                                                 |
| Possible to stratify on age?         | yes                                                                                                                                                                         | yes                                                                                                                                        | yes                                                                                       | no                                                       | yes                                                                | yes                               | no                                                                                | yes                                                      |
| Sex (%)                              | females (100)                                                                                                                                                               | males (45)<br>females (55)                                                                                                                 | males (46)<br>females (54)                                                                | males (46)<br>females (54)                               | males (44)<br>females (56)                                         | males (46)<br>females (54)        | males (54)<br>females (46)                                                        | males (50)<br>females (50)                               |
| Race/ethnicity                       | Hausa tribe (7.5)<br>Ibo tribe (22.0)<br>Yoruba tribe (11.5)                                                                                                                | 10 SA ethnicities (47)<br>8 BF ethnicities (19)<br>8 Ghana                                                                                 | SA (70)<br>Mozambican/other (30)                                                          | Asian Indian (68)<br>Chinese (3)<br>Creoles (27)         | not reported                                                       | not reported                      | not reported                                                                      | not reported                                             |

| Name of cohort           | ACCME's HPV and Cervical Cancer Study       | AWI-Gen                                                | HAALSI                                                                                    | NCD Intervention Programme                                                                  | DUCS-HTN      | Ibadan Study of Aging                                                                           | Prospective Cohort in DRC                                         | The Benin Study                                        |
|--------------------------|---------------------------------------------|--------------------------------------------------------|-------------------------------------------------------------------------------------------|---------------------------------------------------------------------------------------------|---------------|-------------------------------------------------------------------------------------------------|-------------------------------------------------------------------|--------------------------------------------------------|
|                          | Other tribes (59.0)                         | ethnicities (18)<br>13 Kenya ethnicities (18)          |                                                                                           |                                                                                             |               |                                                                                                 |                                                                   |                                                        |
| Rural/urban location (%) | rural (12)<br>semi-rural (46)<br>urban (42) | not reported                                           | rural (100)                                                                               | not reported                                                                                | urban (100)   | rural (34) urban (26) semi-urban (40)                                                           | not reported                                                      | rural (31) urban (37) semi-urban (32)                  |
| Comparison groups        | HPV $\emptyset$ (6727) vs HPV+ (4773)       | SA (4848)<br>BF (2079)<br>Ghana (1988)<br>Kenya (1942) | HIV $\emptyset$ (3279) vs HIV+ (1134)<br>dyslipidaemic (2860) vs non-dyslipidaemic (1387) | Mauritian Indian (9024) vs Mauritian Creole (1075)<br>diabetic (628) vs non-diabetic (3317) | none reported | major depressive disorder cases (134) vs non (2015)<br>hypertensive (973) vs normotensive (496) | with metabolic syndrome (393) vs without metabolic syndrome (414) | insulin resistant (106) vs non-insulin resistant (310) |

ART: antiretroviral therapy; MUg: Mildmay Uganda Clinic; BP: blood pressure; CC: cervical cancer; HPV $\emptyset$ : HPV negative; HIV $\emptyset$ : HIV negative; HDSS: Health & Demographic Surveillance Systems; CVD: cardiovascular diseases

STable 5d: Participant characteristics of included studies with only adults aged >18 yrs, sampled from occupational and clinical populations

| Name of cohort                       | Basotho Gold Miners Cohort                                          | TLC Cohort Study                                                                                                                                                | Cohort of HIV-infected, ART-naïve adults                                               | Operational cohort of treatment naïve HIV-infected men and women | Prospective cohort of nulliparous women                                                                                                          | ABC-DO Study                                                                                                               | HARP Study                                                                                                                                                                                                     | CoLTART Study                                                                                                                                     |
|--------------------------------------|---------------------------------------------------------------------|-----------------------------------------------------------------------------------------------------------------------------------------------------------------|----------------------------------------------------------------------------------------|------------------------------------------------------------------|--------------------------------------------------------------------------------------------------------------------------------------------------|----------------------------------------------------------------------------------------------------------------------------|----------------------------------------------------------------------------------------------------------------------------------------------------------------------------------------------------------------|---------------------------------------------------------------------------------------------------------------------------------------------------|
| Sampling frame                       | a single mine                                                       | 1 clinic                                                                                                                                                        | primary care facilities within Lusaka                                                  | Perinatal HIV Research Unit, urban Wellness clinic               | three hospitals                                                                                                                                  | secondary and tertiary hospitals                                                                                           | HIV outpatient clinic in BF and HIV treatment centres in SA                                                                                                                                                    | DART Trial, RCC, GPC, Entebbe Pre-ART cohort                                                                                                      |
| Inclusion criteria                   | included miners originally from Lesotho laid off from a single mine | included HIV+ patients seen at TLC, ≥18yrs, either treatment-naïve or switched onto ART regimen containing 300mg tenofovir daily since Apr 2004 and by Oct 2011 | included adults ≥15yrs, treatment-naïve/newly initiating ART, with baseline creatinine | included adults ≥18yrs                                           | included nulliparous women at gestational ages <20wks; excluded pre-existing conditions (including hypertension), previous spontaneous abortions | included women ≥18yrs presenting with new primary BC diagnosis; excluded women already receiving treatment, benign lesions | included HIV-1 seropositivity, aged 25-50yrs, resident in the city; excluded history of prior CC treatment, previous hysterectomy, pregnant or <8wks post-partum, women with CIN2+ at baseline from follow-ups | included HIV+ adults ≥18yrs, on ART/eligible to initiate, not participating in another study; excluded those too sick to undergo study procedures |
| Subject flow (# eligible # enrolled) | eligible 779 enrolled 624                                           | eligible not reported enrolled 30000 ongoing accrual                                                                                                            | eligible 36289 enrolled 25779                                                          | eligible not reported enrolled 3635                              | eligible not reported enrolled 3000                                                                                                              | eligible 2100 enrolled 2100                                                                                                | eligible 1473 enrolled 1077                                                                                                                                                                                    | eligible 1108 enrolled 1095                                                                                                                       |
| Sample size at final evaluation      | 553                                                                 |                                                                                                                                                                 | 9633                                                                                   | 3308                                                             | 2630                                                                                                                                             | 2100                                                                                                                       | 963                                                                                                                                                                                                            | not reported                                                                                                                                      |
| Age (mean)                           | 30-59yrs (49)                                                       | >18yrs                                                                                                                                                          | >15yrs                                                                                 | ≥18 (33)                                                         | (27)                                                                                                                                             | ≥18yrs                                                                                                                     | 25-50yrs<br>BF (36:median)<br>SA (34:median)                                                                                                                                                                   | ≥18 (45)                                                                                                                                          |
| Possible to stratify on age?         | no                                                                  | yes                                                                                                                                                             | no                                                                                     | no                                                               | yes                                                                                                                                              | no                                                                                                                         | no                                                                                                                                                                                                             | yes                                                                                                                                               |
| Sex (%)                              | males (100)                                                         | males (36)<br>females (64)                                                                                                                                      | males (40)<br>females (60)                                                             | males (22)<br>females (78)                                       | females (100)                                                                                                                                    | females (100)                                                                                                              | females (100)                                                                                                                                                                                                  | males (35)<br>females (65)                                                                                                                        |

| Name of cohort           | Basotho Gold Miners Cohort | TLC Cohort Study                   | Cohort of HIV-infected, ART-naïve adults | Operational cohort of treatment naïve HIV-infected men and women | Prospective cohort of nulliparous women | ABC-DO Study                                                                                                                           | HARP Study           | CoLTART Study                         |
|--------------------------|----------------------------|------------------------------------|------------------------------------------|------------------------------------------------------------------|-----------------------------------------|----------------------------------------------------------------------------------------------------------------------------------------|----------------------|---------------------------------------|
| Race/ethnicity           | not reported               | SA (91)<br>non-SA (9)<br>other (0) | not reported                             | not reported                                                     | not reported                            | Namibia - black (22)<br>Namibia - non-black (6)<br>Nigeria (21)<br>SA - black (19)<br>SA - non-black (2)<br>Uganda (22)<br>Zambia (88) | not reported         | not reported                          |
| Rural/urban location (%) | rural (100)                | urban (100)                        | urban (100)                              | not reported                                                     | not reported                            | rural (47)<br>urban (53)                                                                                                               | not reported         | rural (47)<br>urban (53)              |
| Comparison groups        | none reported              | pre-ART (8217)<br>vs ART (21101)   | none reported                            | none reported                                                    | none reported                           | none reported                                                                                                                          | BF (583)<br>SA (494) | non-TDF ART (385)<br>vs TDF ART (568) |

ART: antiretroviral therapy; TDF: tenofovir<sup>1</sup> MUg: Mildmay Uganda Clinic; BP: blood pressure; BC: breast cancer; CC: cervical cancer; RCC: Rakai Community Cohort; GPC: General Population Cohort; DART: Development of Antiretroviral Therapy; HIV $\emptyset$ : HIV negative;

STable 5d continued: Participant characteristics of included studies with only adults aged >18yrs, sampled from occupational and clinical populations

| Name of cohort                       | Prospective cohort study in Ghana                                                                           | RWISA                                                                                                                                         | Prospective cohort study in Benin                                                                  | UARTO Cohort                                                                        |
|--------------------------------------|-------------------------------------------------------------------------------------------------------------|-----------------------------------------------------------------------------------------------------------------------------------------------|----------------------------------------------------------------------------------------------------|-------------------------------------------------------------------------------------|
| Sampling frame                       | two hospitals in Accra                                                                                      | grassroots women's orgs, HIV clinics                                                                                                          | six referral facilities                                                                            | Mbarara Regional Referral Hospital                                                  |
| Inclusion criteria                   | excluded women with previously established chronic hypertension and <17wks pregnancy                        | included women ≥25yrs, present in Rwanda during 1994, no history of ART except single-dose nevirapine to prevent mother-to-child transmission | included women who gave birth over 12mo period                                                     | included treatment-naïve/newly initiating ART, ≥18yrs, living within 60km of clinic |
| Subject flow (# eligible # enrolled) | eligible not reported<br>enrolled 1010                                                                      | eligible not reported<br>enrolled 936                                                                                                         | eligible not reported<br>enrolled 709                                                              | eligible 1020<br>enrolled 500                                                       |
| Sample size at final evaluation      | 824                                                                                                         | not reported                                                                                                                                  | 567                                                                                                | 771                                                                                 |
| Age (mean)                           | ≥18 (28)                                                                                                    | ≥25<br>HIV+ (35)<br>HIV∅ (42)                                                                                                                 | (26)                                                                                               | ≥18yrs (34)                                                                         |
| Possible to stratify on age?         | no                                                                                                          | yes                                                                                                                                           | no                                                                                                 | no                                                                                  |
| Sex (%)                              | females (100)                                                                                               | females (100)                                                                                                                                 | females (100)                                                                                      | males (30) females (70)                                                             |
| Race/ethnicity                       | not reported                                                                                                | not reported                                                                                                                                  | not reported                                                                                       | not reported                                                                        |
| Rural/urban location (%)             | rural (3)<br>Accra (77)<br>other urban (18)                                                                 | not reported                                                                                                                                  | semi-urban (100)                                                                                   | rural (100)                                                                         |
| Comparison groups                    | normotensive (700) vs pregnancy induced hypertension (59) vs pre-eclampsia (14) vs chronic hypertension (2) | HIV+ (710) vs HIV∅ (226)                                                                                                                      | women with live birth (205) vs women with perinatal death (64) vs women with normal delivery (440) | 3+ visits with high BP (73) vs no visits with high BP (157)                         |

HIV∅: HIV negative

STable 6a: Characteristics of chronic NCD data of included studies with children and young adults aged <20 years, sampled from general populations

| Name of cohort                     | BT20                                                                                                                                                               | Seychelles Child Development Study                                                                                                                                               | The Lungwena Child Survival Study                                                                                                                                                                                              |
|------------------------------------|--------------------------------------------------------------------------------------------------------------------------------------------------------------------|----------------------------------------------------------------------------------------------------------------------------------------------------------------------------------|--------------------------------------------------------------------------------------------------------------------------------------------------------------------------------------------------------------------------------|
| Hypertension definition            | <b>hypertension</b> defined using age, sex and height standardised percentile tables for BP classification, where hypertension $\geq$ 95th percentile              | <b>hypertension</b> not defined                                                                                                                                                  | <b>hypertension</b> not measured                                                                                                                                                                                               |
| Source of measurement              | <b>BP</b> measured in triplicate using Omron M6 after participant had been sitting for 5min with resting intervals of 2min; average of three used to define status | <b>BP</b> measured in triplicate using Omron M5 after participant had been sitting for 50min; average of three used to define status                                             |                                                                                                                                                                                                                                |
| # of time points measured          | 6                                                                                                                                                                  | $\geq$ 4                                                                                                                                                                         |                                                                                                                                                                                                                                |
| Reporting of chronic NCD           | point prevalence                                                                                                                                                   | none reported                                                                                                                                                                    |                                                                                                                                                                                                                                |
| Estimate in total sample           | 14.8                                                                                                                                                               |                                                                                                                                                                                  |                                                                                                                                                                                                                                |
| Associated risk factor(s) reported | SES, age, weight and height at 18yrs, relative weight gain                                                                                                         |                                                                                                                                                                                  |                                                                                                                                                                                                                                |
| Diabetes definition                | <b>diabetes</b> defined as glucose $\geq$ 6.1mmol/L or receiving treatment for diabetes                                                                            | <b>diabetes</b> not measured                                                                                                                                                     | <b>obesity</b> BMI cut-off charts for children used to calculate corresponding overweight cut-offs                                                                                                                             |
| Source of measurement              | <b>glucose</b> concentrations measured using enzymatic methods on auto-analyser (Randox Daytona Clinical Analyser)                                                 |                                                                                                                                                                                  | <b>weight</b> measured using spring scale until age 12mo, thereafter with digital bathroom scale to nearest 100g<br><b>height</b> measured with locally constructed height boards to nearest 5mm in supine until able to stand |
| # of time points measured          | 2                                                                                                                                                                  |                                                                                                                                                                                  | $\geq$ 2                                                                                                                                                                                                                       |
| Reporting of chronic NCD           | point prevalence                                                                                                                                                   |                                                                                                                                                                                  | point prevalence                                                                                                                                                                                                               |
| Estimate in total sample           | 14.3                                                                                                                                                               |                                                                                                                                                                                  | 0                                                                                                                                                                                                                              |
| Associated risk factor(s) reported | gender, obesity                                                                                                                                                    |                                                                                                                                                                                  | none reported                                                                                                                                                                                                                  |
| Obesity definition                 | <b>obesity</b> defined using WHO cut-off points for children 5-19yrs, where obesity BMIz $\geq$ 2.0SD from reference median                                        | <b>obesity</b> defined using IOTF criteria corresponding to adult BMI of 30kg/m <sup>2</sup> (British 1990 BMI SD $\geq$ +2.37 and $\geq$ +2.25 in boys and girls, respectively) | <b>obesity</b> not measured                                                                                                                                                                                                    |



| Name of cohort                     | BT20                                                                                                                                                                                                                                  | Seychelles Child Development Study                                                                                             | The Lungwena Child Survival Study |
|------------------------------------|---------------------------------------------------------------------------------------------------------------------------------------------------------------------------------------------------------------------------------------|--------------------------------------------------------------------------------------------------------------------------------|-----------------------------------|
| Source of measurement              | <b>weight</b> measured using digital scale to nearest 1000g with participants wearing light clothing, no shoes<br><b>height</b> measured using portable stadiometer to nearest 1mm with participants wearing light clothing, no shoes | <b>weight</b> measured using precision electronic scale (Seca 870)<br><b>height</b> measured with fixed stadiometer (Seca 208) |                                   |
| # of time points measured          | 15                                                                                                                                                                                                                                    | ≥4                                                                                                                             |                                   |
| Reporting of chronic NCD           | incidence                                                                                                                                                                                                                             | prevalence                                                                                                                     |                                   |
| Estimate in total sample           | 20.5                                                                                                                                                                                                                                  | 3.8%                                                                                                                           |                                   |
| Associated risk factor(s) reported | gender, overweight/ obesity in infancy/ toddlerhood and early childhood, early menarche                                                                                                                                               | weight gain during first year of life, increased maternal BMI                                                                  |                                   |
| CKD definition                     | <b>CKD</b> not measured                                                                                                                                                                                                               | <b>CKD</b> estimated GFR using Cockcroft-Gault formulae                                                                        | <b>CKD</b> not measured           |
| Source of measurement              |                                                                                                                                                                                                                                       | fasting venous blood samples measured using standard enzymatic methods (Thermo Konelab 30 automatic analyser)                  |                                   |
| # of time points measured          |                                                                                                                                                                                                                                       | ≥4                                                                                                                             |                                   |
| Reporting of chronic NCD           |                                                                                                                                                                                                                                       | mean (SD)                                                                                                                      |                                   |
| Estimate in total sample           |                                                                                                                                                                                                                                       | 130.7(33.6)                                                                                                                    |                                   |
| Associated risk factor(s) reported |                                                                                                                                                                                                                                       | none reported                                                                                                                  |                                   |

BMI: body mass index; BP: blood pressure; IOTF: International Obesity Task Force; SD: standard deviation; SES: socio-economic status; GFR: glomerular filtration rate; IOTF: International Obesity Task Force

STable 6b: Characteristics of chronic NCD data of included studies with mixed (children and adults) populations, sampled from general and clinical populations

| Name of cohort            | RCCS                 | Kiang West Longitudinal Population Study                                                                                                                                                                                                                                                                                           | GPC                                                                                                                                                                              | Bukavu Observ Study                                                                                                               | Ellisras Longitudinal Study                                                                                                                             | Mildmay Uganda Cohort                                                | Prospective cohort study in Sudan                                                                                                                 |
|---------------------------|----------------------|------------------------------------------------------------------------------------------------------------------------------------------------------------------------------------------------------------------------------------------------------------------------------------------------------------------------------------|----------------------------------------------------------------------------------------------------------------------------------------------------------------------------------|-----------------------------------------------------------------------------------------------------------------------------------|---------------------------------------------------------------------------------------------------------------------------------------------------------|----------------------------------------------------------------------|---------------------------------------------------------------------------------------------------------------------------------------------------|
| Hypertension definition   | high BP not measured | high BP in 5-18yrs defined as SBP and/or DBP that is ≥95th percentile for sex, age, and age-specific height z scores in this population<br>high BP in >18yrs defined as SBP ≥140mmHg and/or DBP ≥90mmHg and/or on antihypertensive medication the 3mo prior and/or being diagnosed as hypertensive in MRC Keneba clinical database | hypertension defined as SBP ≥140mmHg and/or DBP ≥90mmHg, or self-reported use of antihypertensive medications                                                                    | hypertension defined as SBP ≥140mmHg and/or DBP ≥90mmHg, or self-reported use of antihypertensive medications                     | hypertension defined as average SBP and/or DBP that is ≥95th percentile for sex and age                                                                 | hypertension defined as SBP ≥140mmHg and/or DBP ≥90mmHg on ≥2 visits | target pre-haemodialysis BP defined as SBP ≤140mmHg and/or DBP ≤90mmHg<br>target post-haemodialysis BP defined as SBP ≤130mmHg and/or DBP ≤80mmHg |
| Source of measurement     |                      | BP measured in triplicate with Omron 705IT with resting intervals of 5min; average of second and third used to define status                                                                                                                                                                                                       | BP measured in triplicate using Omron M4-1 after participant had been sitting for ≥15min with resting intervals of 5min; mean of second and third readings used to define status | BP measured in triplicate using Omron Hem 700`E after participant had been sitting for ≥5min; mean of three used to define status | BP measured in triplicate using electronic Micronta monitoring kit after participant had been sitting for ≥5min; average of three used to define status | BP measured using manual sphygmomanometer                            | BP measured prior, during, and after haemodialysis                                                                                                |
| # of time points measured |                      | ≥12                                                                                                                                                                                                                                                                                                                                | 2                                                                                                                                                                                | 2                                                                                                                                 | 13                                                                                                                                                      | 6                                                                    | 2                                                                                                                                                 |
| Reporting of chronic NCD  |                      | prevalence                                                                                                                                                                                                                                                                                                                         | age-adjusted prevalence                                                                                                                                                          | prevalence                                                                                                                        | prevalence                                                                                                                                              | age-standardised prevalence                                          | percentage achieving both pre- and post-haemodialysis BP                                                                                          |

| Name of cohort                     | RCCS                         | Kiang West Longitudinal Population Study                                                                                         | GPC                                                                                                                | Bukavu Observ Study                                                                                                       | Ellisras Longitudinal Study                                             | Mildmay Uganda Cohort        | Prospective cohort study in Sudan |
|------------------------------------|------------------------------|----------------------------------------------------------------------------------------------------------------------------------|--------------------------------------------------------------------------------------------------------------------|---------------------------------------------------------------------------------------------------------------------------|-------------------------------------------------------------------------|------------------------------|-----------------------------------|
| Estimate in total sample           |                              | 5-18yrs (8)<br>>18 (18)                                                                                                          | 7.1                                                                                                                | 2040%                                                                                                                     | 1-11.4%                                                                 | 24.8%                        | 20.3%                             |
| Associated risk factor(s) reported |                              | age, BMI z-score, haemoglobin, high fasting glucose                                                                              | lipids                                                                                                             | none reported                                                                                                             | weight-for-age z-scores, sum of four skinfolds, underweight             | none reported                | none reported                     |
| Diabetes definition                | <b>diabetes</b> not measured | <b>diabetes</b> defined as fasting plasma glucose of $\geq 7$ mmol/L or receiving treatment for diabetes at MRC Keneba clinic    | <b>diabetes</b> defined as HbA1c $> 6.5\%$                                                                         | <b>diabetes</b> defined as fasting glucose $\geq 126$ mg/dol and/or taking diabetes medication                            | <b>pre-diabetes</b> defined as plasma glucose 5.6-6.9mmol/L             | <b>diabetes</b> not measured | <b>diabetes</b> not measured      |
| Source of measurement              |                              | <b>fasting plasma glucose</b> measured using Accu Check                                                                          | <b>HbA1c</b> measured from whole-blood samples, analysis performed using Cobas Integra 400 plus chemistry analyser | <b>glucose concentration</b> analysed by glucose oxidase method using portable electronic monitor (Codefree)              | <b>fasting plasma glucose</b> collected and stored for later analysis   |                              |                                   |
| # of time points measured          |                              | $\geq 12$                                                                                                                        | 2                                                                                                                  | 1                                                                                                                         | $\geq 1$                                                                |                              |                                   |
| Reporting of chronic NCD           |                              | prevalence                                                                                                                       | age-adjusted prevalence                                                                                            | prevalence                                                                                                                | prevalence                                                              |                              |                                   |
| Estimate in total sample           |                              | 5-18yrs (0.8)<br>>18 (0.7)                                                                                                       | 1.1                                                                                                                | 280%                                                                                                                      | males (46)<br>females (50)                                              |                              |                                   |
| Associated risk factor(s) reported |                              | none reported                                                                                                                    | lipids                                                                                                             | age, WC, BP                                                                                                               | none reported                                                           |                              |                                   |
| Obesity definition                 | <b>obesity</b> not measured  | <b>obesity in 5-18yrs</b> defined as weight-for-height z-scores $> 0.68$<br><b>obesity in &gt;18yrs</b> defined as BMI $\geq 30$ | <b>obesity</b> defined as WC $\geq 94$ cm for men and $\geq 80$ cm for women                                       | <b>obesity</b> defined as BMI $\geq 30$<br><b>abdominal obesity</b> defined as WC $\geq 94$ cm for both males and females | <b>overweight</b> defined according to the Cole et al BMI cut-off point | <b>obesity</b> not measured  | <b>obesity</b> not measured       |

| Name of cohort                     | RCCS                                                                                                                                  | Kiang West Longitudinal Population Study                                                                                                                             | GPC                                                                                                                                       | Bukavu Observ Study                                                                                                                                                                                                                          | Ellisras Longitudinal Study                                                                                                        | Mildmay Uganda Cohort   | Prospective cohort study in Sudan |
|------------------------------------|---------------------------------------------------------------------------------------------------------------------------------------|----------------------------------------------------------------------------------------------------------------------------------------------------------------------|-------------------------------------------------------------------------------------------------------------------------------------------|----------------------------------------------------------------------------------------------------------------------------------------------------------------------------------------------------------------------------------------------|------------------------------------------------------------------------------------------------------------------------------------|-------------------------|-----------------------------------|
| Source of measurement              |                                                                                                                                       | <b>weight</b> measured to nearest 10g using portable scales (Tanita WB100)<br><b>height</b> measured to nearest 0.1cm using stadiometer without footwear or headwear | <b>WC</b> measured in duplicate using Seca 201 Ergonomic Circumference Measuring Tape to nearest 0.1cm; mean of two used to define status | <b>weight</b> measured to nearest 100g using electronic scale (Tanita HD-325) with participants in light-weight clothing<br><b>height</b> measured with a SECA mesband 206cm<br><b>WC</b> measured using a tape measure to the nearest 0.5cm | <b>weight</b> measured to nearest 0.1kg using electric scale<br><b>height</b> measured to nearest 0.1cm using Martin anthropometer |                         |                                   |
| # of time points measured          |                                                                                                                                       | ≥12                                                                                                                                                                  | 2                                                                                                                                         | 3                                                                                                                                                                                                                                            | 13                                                                                                                                 |                         |                                   |
| Reporting of chronic NCD           |                                                                                                                                       | prevalence                                                                                                                                                           | age-adjusted prevalence                                                                                                                   | incidence                                                                                                                                                                                                                                    | prevalence                                                                                                                         |                         |                                   |
| Estimate in total sample           |                                                                                                                                       | 5-18yrs (13)<br>>18 (37)                                                                                                                                             | 10                                                                                                                                        | 535/100,000                                                                                                                                                                                                                                  | males (-.3-4.9%)<br>females (1.6-15.5%)                                                                                            |                         |                                   |
| Associated risk factor(s) reported |                                                                                                                                       | none reported                                                                                                                                                        | lipids                                                                                                                                    | age, gender, PA                                                                                                                                                                                                                              | none reported                                                                                                                      |                         |                                   |
| CKD definition                     | <b>CKD</b> defined eGFR as mildly (60-89ml/min) or moderately reduced (<60ml/min)                                                     | <b>CKD</b> not measured                                                                                                                                              | <b>CKD</b> not measured                                                                                                                   | <b>CKD</b> not measured                                                                                                                                                                                                                      | <b>CKD</b> not measured                                                                                                            | <b>CKD</b> not measured | <b>CKD</b> not measured           |
| Source of measurement              | <b>eGFR</b> estimated using MDRD<br><b>creatinine concentration</b> measured from blood sera using rate-based enzymatic assay (Roche) |                                                                                                                                                                      |                                                                                                                                           |                                                                                                                                                                                                                                              |                                                                                                                                    |                         |                                   |
| # of time points measured          | ≥2                                                                                                                                    |                                                                                                                                                                      |                                                                                                                                           |                                                                                                                                                                                                                                              |                                                                                                                                    |                         |                                   |
| Reporting of chronic NCD           | rates of eGFR decline                                                                                                                 |                                                                                                                                                                      |                                                                                                                                           |                                                                                                                                                                                                                                              |                                                                                                                                    |                         |                                   |

| Name of cohort                     | RCCS                                   | Kiang West Longitudinal Population Study | GPC | Bukavu Observ Study | Ellisras Longitudinal Study | Mildmay Uganda Cohort | Prospective cohort study in Sudan |
|------------------------------------|----------------------------------------|------------------------------------------|-----|---------------------|-----------------------------|-----------------------|-----------------------------------|
| Estimate in total sample           | HIV positive (32)<br>HIV negative (20) |                                          |     |                     |                             |                       |                                   |
| Associated risk factor(s) reported | HIV infection                          |                                          |     |                     |                             |                       |                                   |

eGFR: estimated glomerular filtration rate; BP: blood pressure; MRC: Medical Research Council; WC: waist-circumference; PA: physical activity; HIV∅: HIV negative

STable 6c: Characteristics of chronic NCD data of included studies with adults aged >18 years, sampled from general populations

| Name of cohort            | ACCME's HPV and Cervical Cancer Study                                                                                                   | AWI-Gen                                                                                                                                                                              | HAALSI                                                                                                                                                                            | NCD Intervention Programme                                                                                                                                        | DUCS-HTN                                                                                                                                                                             | Ibadan Study of Aging                                                                                                                                                      | Prospective Cohort in Democratic Republic of Congo                                                                                                                                                             | The Benin Study                                                                                                                                                                                  |
|---------------------------|-----------------------------------------------------------------------------------------------------------------------------------------|--------------------------------------------------------------------------------------------------------------------------------------------------------------------------------------|-----------------------------------------------------------------------------------------------------------------------------------------------------------------------------------|-------------------------------------------------------------------------------------------------------------------------------------------------------------------|--------------------------------------------------------------------------------------------------------------------------------------------------------------------------------------|----------------------------------------------------------------------------------------------------------------------------------------------------------------------------|----------------------------------------------------------------------------------------------------------------------------------------------------------------------------------------------------------------|--------------------------------------------------------------------------------------------------------------------------------------------------------------------------------------------------|
| Hypertension definition   | <b>hypertension</b> defined as yes/no                                                                                                   | <b>hypertension</b> defined as SBP $\geq 140$ and/or DBP $\geq 90$ and/or self-reported use of antihypertensive medication                                                           | <b>hypertension</b> defined as SBP $\geq 140$ and/or DBP $\geq 90$ and/or self-reported use of antihypertensive medication                                                        | <b>hypertension</b> defined as SBP $\geq 140$ and/or DBP $\geq 90$ and/or self-reported use of antihypertensive medication                                        | <b>hypertension</b> defined as SBP $\geq 140$ and/or DBP $\geq 90$ and/or self-reported use of antihypertensive medication                                                           | <b>hypertension</b> defined as SBP $\geq 140$ and/or DBP $\geq 90$ and/or self-reported use of antihypertensive medication and/or previous diagnosis by physician          | <b>hypertension</b> defined using IDF Europe criteria as SBP $\geq 130$ and/or DBP $\geq 85$                                                                                                                   | <b>hypertension</b> defined as SBP $\geq 130$ and/or DBP $\geq 85$                                                                                                                               |
| Source of measurement     | <b>BP</b> measured in triplicate with OMRONVR BP760 after participant had been sitting for $\geq 15$ min with resting intervals of 1min | <b>BP</b> measured in triplicate with Omron M6 after participant had been sitting for $\geq 3$ min with resting intervals of 2min; average of second and third used to define status | <b>BP</b> measured in triplicate with Omron M6W after participant had been sitting for 5 \min with resting intervals of 2 \min; average of second and third used to define status | <b>BP</b> measured in duplicate using standard mercury sphygmomanometer after participant had been sitting for $\geq 5$ min; average of two used to define status | <b>BP</b> measured in triplicate with Omro M2/Beurer BMI 40 after participant had been sitting for $\geq 5$ min with resting intervals of 2min; average of two used to define status | <b>BP</b> measured in triplicate with Omro MS-2 after participant had been sitting for $\geq 5$ min with resting intervals of 5min; average of three used to define status | <b>BP</b> measured in triplicate with standard mercury sphygmomanometer after participant had been sitting for $\geq 30$ min with resting intervals of 2min; average of second and third used to define status | <b>BP</b> measured in duplicate with standard mercury sphygmomanometer after participant had been sitting for $\geq 10$ min with resting intervals of 2min; average of two used to define status |
| # of time points measured | 5                                                                                                                                       | 1                                                                                                                                                                                    | $\geq 8$                                                                                                                                                                          | 3                                                                                                                                                                 | 1 (1/5 with 2)                                                                                                                                                                       | 1                                                                                                                                                                          | 1                                                                                                                                                                                                              | 3                                                                                                                                                                                                |
| Reporting of chronic NCD  | baseline prevalence                                                                                                                     | mean prevalence                                                                                                                                                                      | prevalence                                                                                                                                                                        | incidence                                                                                                                                                         | prevalence                                                                                                                                                                           | 12mo prevalence                                                                                                                                                            | point prevalence                                                                                                                                                                                               | 4yr prevalence                                                                                                                                                                                   |
| Estimate in total sample  | 14.8                                                                                                                                    | BF (15.1)<br>SA (40.0)<br>Kenya (25.6)<br>Ghana (24.5)                                                                                                                               | 58.4                                                                                                                                                                              | 12.1                                                                                                                                                              | 37.0                                                                                                                                                                                 | 10.3                                                                                                                                                                       | 12.5                                                                                                                                                                                                           | 22                                                                                                                                                                                               |

| Name of cohort                     | ACCME's HPV and Cervical Cancer Study                                                    | AWI-Gen                                                                                             | HAALSI                                                                                                                                                                   | NCD Intervention Programme                                                                                                                                     | DUCS-HTN                                                                               | Ibadan Study of Aging                                                                | Prospective Cohort in Democratic Republic of Congo                                                                                                                        | The Benin Study                                                                 |
|------------------------------------|------------------------------------------------------------------------------------------|-----------------------------------------------------------------------------------------------------|--------------------------------------------------------------------------------------------------------------------------------------------------------------------------|----------------------------------------------------------------------------------------------------------------------------------------------------------------|----------------------------------------------------------------------------------------|--------------------------------------------------------------------------------------|---------------------------------------------------------------------------------------------------------------------------------------------------------------------------|---------------------------------------------------------------------------------|
| Associated risk factor(s) reported | none reported                                                                            | age, sex                                                                                            | age, sex                                                                                                                                                                 | age, ethnicity, 2h plasma glucose, BMI                                                                                                                         | obesity, physical inactivity, alcohol use                                              | sex, urban/semi-urban, overweight/obesity                                            | none reported                                                                                                                                                             | none reported                                                                   |
| Diabetes definition                | <b>diabetes</b> defined as yes/no                                                        | <b>diabetes</b> defined as fasting blood glucose >7.0mmol/L and/or receiving treatment for diabetes | <b>diabetes</b> defined as self-reported history and/or fasting blood glucose >7.0mmol/L and/or random blood glucose $\geq$ 11.1 and/or receiving treatment for diabetes | <b>diabetes</b> defined as self-reported history and/or fasting blood glucose >7.0mmol/L and/or 2h glucose $\geq$ 11.1 and/or receiving treatment for diabetes | <b>history of diabetes</b> defined as yes/no; using antidiabetic agents; using insulin | <b>diabetes</b> defined as self-reported history or receiving treatment for diabetes | <b>diabetes</b> defined as self-reported history and/or fasting blood glucose >7.0mmol/L and/or 2h glucose $\geq$ 11.1 and/or receiving treatment for diabetes            | <b>high fasting glycaemia</b> defined as fasting blood glucose $\geq$ 5.6mmol/L |
| Source of measurement              | <b>glucose</b> measured by testing spot urine samples with Multistix 10 SG reagent strip | <b>fasting blood glucose</b> measurement not reported                                               | <b>blood glucose</b> collected from finger prick (CareSens N) and measured using CareSense N Monitor                                                                     | <b>fasting blood glucose</b> measured using YSI glucose analysers within 3h of collection <b>OGTT</b> status determined according to 1999 WHO criteria         | questionnaire                                                                          | questions from US Health Interview Survey                                            | <b>fasting blood glucose</b> analysed with glucometer (Ascencia Elite) that adjusts capillary measurements to plasma values <b>OGTT</b> classification using WHO criteria | <b>fasting blood glucose</b> analysed using Elitechgroup kits                   |
| # of time points measured          | 1                                                                                        | 1                                                                                                   | $\geq$ 8                                                                                                                                                                 | 3                                                                                                                                                              | 1                                                                                      | 1                                                                                    | 8                                                                                                                                                                         | 3                                                                               |
| Reporting of chronic NCD           | baseline prevalence                                                                      | not reported                                                                                        | prevalence                                                                                                                                                               | incidence                                                                                                                                                      | prevalence                                                                             | 12mo prevalence                                                                      | incidence                                                                                                                                                                 | 4yr prevalence                                                                  |
| Estimate in total sample           | 2                                                                                        |                                                                                                     | 11                                                                                                                                                                       | 15.9                                                                                                                                                           | 6                                                                                      | 2                                                                                    | 29/1,000pys                                                                                                                                                               | 20                                                                              |

| Name of cohort                                    | ACCME's HPV and Cervical Cancer Study     | AWI-Gen                                 | HAALSI                                                                                                                   | NCD Intervention Programme                         | DUCS-HTN                                                                                                                                                                                     | Ibadan Study of Aging       | Prospective Cohort in Democratic Republic of Congo                                              | The Benin Study                                                                                                                      |
|---------------------------------------------------|-------------------------------------------|-----------------------------------------|--------------------------------------------------------------------------------------------------------------------------|----------------------------------------------------|----------------------------------------------------------------------------------------------------------------------------------------------------------------------------------------------|-----------------------------|-------------------------------------------------------------------------------------------------|--------------------------------------------------------------------------------------------------------------------------------------|
| Associated risk factor(s) reported                | none reported                             |                                         | age, sex                                                                                                                 | year of study, sex, ethnicity, obesity, BP, lipids | none reported                                                                                                                                                                                | urban, high SES             | age, physical inactivity, non-diabetic hyperglycaemia, metabolic syndrome                       | none reported                                                                                                                        |
| Obesity definition                                | <b>obesity</b> definition not reported    | <b>obesity</b> defined as BMI $\geq 30$ | <b>obesity</b> defined according to WHO: obese Grade I 30.0-34.9; obese Grade II 35.0-39.9; extreme obesity $\geq 40$    | <b>obesity</b> defined as BMI $\geq 30$            | <b>obesity</b> defined as obese Grade I 30-35; obese Grade II $>35$                                                                                                                          | <b>obesity</b> not measured | <b>obesity</b> defined using IDF Europe criteria as WC $>94$ cm in men and $>80$ cm in women    | <b>obesity</b> defined as BMI $\geq 30$<br><b>abdominal obesity</b> defined as $\geq 80$ cm for females and $\geq 94$ cm for males   |
| Source of measurement                             | <b>weight</b> and <b>height</b> collected | not reported                            | <b>weight</b> measured to nearest 0.1kg using Genesis Growth Management Scale<br><b>height</b> measured to nearest 0.1cm | not reported                                       | <b>weight</b> measured using digital scale (Seca) to nearest 0.1Kg with participants wearing light clothing<br><b>height</b> measured to the nearest 1cm with participants not wearing shoes |                             | <b>WC</b> measured with flexible tape to nearest 1mm with participants standing, heels together | <b>weight</b> measured in sitting position<br><b>height</b> measured in standing position<br><b>WC</b> measured in standing position |
| # of time points measured                         | 1                                         | 1                                       | 1                                                                                                                        | 1                                                  | 2                                                                                                                                                                                            |                             | 1                                                                                               | 3                                                                                                                                    |
| Reporting of chronic NCD Estimate in total sample | not reported                              | not reported                            | prevalence<br>Grade I (17.7)<br>Grade II (7.4)<br>extreme (4.9)                                                          | not reported                                       | prevalence<br>Grade I (19)<br>Grade II (10)                                                                                                                                                  |                             | prevalence<br>17                                                                                | 4yr prevalence<br>obese (24.3)<br>abdominal (42.3)                                                                                   |



| Name of cohort                     | ACCME's HPV and Cervical Cancer Study                                                               | AWI-Gen          | HAALSI           | NCD Intervention Programme | DUCS-HTN         | Ibadan Study of Aging | Prospective Cohort in Democratic Republic of Congo | The Benin Study  |
|------------------------------------|-----------------------------------------------------------------------------------------------------|------------------|------------------|----------------------------|------------------|-----------------------|----------------------------------------------------|------------------|
| Associated risk factor(s) reported |                                                                                                     |                  | none reported    |                            | none reported    |                       | none reported                                      | none reported    |
| CKD definition                     | CKD defined as yes/no                                                                               | CKD not measured | CKD not measured | CKD not measured           | CKD not measured | CKD not measured      | CKD not measured                                   | CKD not measured |
| Source of measurement              | spot urine samples collected and tested with Multistix 10 SG reagent strip                          |                  |                  |                            |                  |                       |                                                    |                  |
| # of time points measured          | 1                                                                                                   |                  |                  |                            |                  |                       |                                                    |                  |
| Reporting of chronic NCD           | baseline prevalence                                                                                 |                  |                  |                            |                  |                       |                                                    |                  |
| Estimate in total sample           | 0                                                                                                   |                  |                  |                            |                  |                       |                                                    |                  |
| Associated risk factor(s) reported | none reported                                                                                       |                  |                  |                            |                  |                       |                                                    |                  |
| CKD definition                     | CC defined using histology                                                                          | CC not measured  | CC not measured  | CC not measured            | CC not measured  | CC not measured       | CC not measured                                    | CC not measured  |
| Source of measurement              | pelvic examinations; colposcopy and biopsy for all with persistent hrHPV infection and CIN2+ lesion |                  |                  |                            |                  |                       |                                                    |                  |
| # of time points measured          | 5                                                                                                   |                  |                  |                            |                  |                       |                                                    |                  |
| Reporting of chronic NCD           | not reported                                                                                        |                  |                  |                            |                  |                       |                                                    |                  |
| Estimate in total sample           |                                                                                                     |                  |                  |                            |                  |                       |                                                    |                  |

| Name of cohort                     | ACCME's HPV and Cervical Cancer Study | AWI-Gen | HAALSI | NCD Intervention Programme | DUCS-HTN | Ibadan Study of Aging | Prospective Cohort in Democratic Republic of Congo | The Benin Study |
|------------------------------------|---------------------------------------|---------|--------|----------------------------|----------|-----------------------|----------------------------------------------------|-----------------|
| Associated risk factor(s) reported |                                       |         |        |                            |          |                       |                                                    |                 |

BP: blood pressure; WC: waist-circumference; OGTT: oral glucose tolerance test; CC: cervical cancer; IDF: International Diabetes Federation; ART: antiretroviral therapy

STable 6d: Characteristics of chronic NCD data of included studies with adults aged >18 years, sampled from occupational and clinical populations

| Name of cohort            | Basotho Gold Miners Cohort       | TLC Cohort Study                 | Cohort of HIV-infected, ART-naïve adults | Operational cohort of treatment naïve HIV-infected men and women | Prospective cohort of nulliparous women                                                                                                                                                                                                                                                             | ABC-DO Study                     | HARP Study                       | CoLTART Study                                                                                                                                                     |
|---------------------------|----------------------------------|----------------------------------|------------------------------------------|------------------------------------------------------------------|-----------------------------------------------------------------------------------------------------------------------------------------------------------------------------------------------------------------------------------------------------------------------------------------------------|----------------------------------|----------------------------------|-------------------------------------------------------------------------------------------------------------------------------------------------------------------|
| Hypertension definition   | <b>hypertension</b> not measured | <b>hypertension</b> not measured | <b>hypertension</b> not measured         | <b>hypertension</b> not measured                                 | <b>hypertension</b> defined as SBP $\geq 140$ and/or DBP $\geq 90$<br><b>gestational hypertension</b> defined as hypertension that develops after 20th gestation wk without proteinuria and if returns to normal in postpartum<br><b>pre-eclampsia</b> defined as both hypertension and proteinuria | <b>high BP</b> defined as yes/no | <b>hypertension</b> not measured | <b>hypertension</b> defined as SBP $\geq 140$ and/or DBP $\geq 90$ and/or self-reported use of antihypertensive medication and/or previous diagnosis by physician |
| Source of measurement     |                                  |                                  |                                          |                                                                  | <b>BP</b> measurement not reported<br><b>proteinuria</b> measured from 24hr urine specimen or semi-quantitative dip stick                                                                                                                                                                           | questionnaire                    |                                  | <b>BP</b> measured using standard Omron M6                                                                                                                        |
| # of time points measured |                                  |                                  |                                          |                                                                  | 2                                                                                                                                                                                                                                                                                                   | 1                                |                                  | 3                                                                                                                                                                 |

| Name of cohort                     | Basotho Gold Miners Cohort | TLC Cohort Study      | Cohort of HIV-infected, ART-naïve adults | Operational cohort of treatment naïve HIV-infected men and women | Prospective cohort of nulliparous women | ABC-DO Study                                           | HARP Study            | CoLTART Study                                                                                                                                                  |
|------------------------------------|----------------------------|-----------------------|------------------------------------------|------------------------------------------------------------------|-----------------------------------------|--------------------------------------------------------|-----------------------|----------------------------------------------------------------------------------------------------------------------------------------------------------------|
| Reporting of chronic NCD           |                            |                       |                                          |                                                                  | incidence of hypertension               | prevalence at baseline                                 |                       | baseline prevalence                                                                                                                                            |
| Estimate in total sample           |                            |                       |                                          |                                                                  | 29                                      | not reported                                           |                       | 23.1                                                                                                                                                           |
| Associated risk factor(s) reported |                            |                       |                                          |                                                                  | cohabitation, previous abortions        | ethnicity, age, BMI, alcohol intake, smoking, diabetes |                       | protease inhibitor containing regimens                                                                                                                         |
| Diabetes definition                | diabetes not measured      | diabetes not measured | diabetes not measured                    | diabetes not measured                                            | diabetes not measured                   | diabetes defined as yes/no                             | diabetes not measured | diabetes defined as self-reported history and/or fasting blood glucose $\geq 6.4$ mmol/L and/or 2h glucose $\geq 11.1$ and/or receiving treatment for diabetes |
| Source of measurement              |                            |                       |                                          |                                                                  |                                         | questionnaire                                          |                       | fasting blood glucose measured using Cobas Integra 400 plus                                                                                                    |
| # of time points measured          |                            |                       |                                          |                                                                  |                                         | 1                                                      |                       | 3                                                                                                                                                              |
| Reporting of chronic NCD           |                            |                       |                                          |                                                                  |                                         | prevalence at baseline                                 |                       | baseline prevalence                                                                                                                                            |
| Estimate in total sample           |                            |                       |                                          |                                                                  |                                         | not reported                                           |                       | 4                                                                                                                                                              |
| Associated risk factor(s) reported |                            |                       |                                          |                                                                  |                                         | ethnicity, age, BMI, high BP                           |                       | age                                                                                                                                                            |

| Name of cohort                     | Basotho Gold Miners Cohort  | TLC Cohort Study            | Cohort of HIV-infected, ART-naïve adults | Operational cohort of treatment naïve HIV-infected men and women                 | Prospective cohort of nulliparous women | ABC-DO Study                                                                     | HARP Study                  | CoLTART Study                                                                                                                                                                                                                     |
|------------------------------------|-----------------------------|-----------------------------|------------------------------------------|----------------------------------------------------------------------------------|-----------------------------------------|----------------------------------------------------------------------------------|-----------------------------|-----------------------------------------------------------------------------------------------------------------------------------------------------------------------------------------------------------------------------------|
| Obesity definition                 | <b>obesity</b> not measured | <b>obesity</b> not measured | <b>obesity</b> not measured              | <b>obesity</b> defined as BMI $\geq$ 30                                          | <b>obesity</b> not measured             | <b>obesity</b> defined as BMI $\geq$ 30                                          | <b>obesity</b> not measured | <b>abdominal obesity</b> defined as WHR $\geq$ 0.95 for males and $\geq$ 0.85 for females or WC $\geq$ 94cm for males and $\geq$ 80cm for females                                                                                 |
| Source of measurement              |                             |                             |                                          | <b>weight</b> measurement not reported<br><b>height</b> measurement not reported |                                         | <b>weight</b> measurement not reported<br><b>height</b> measurement not reported |                             | <b>weight</b> measured using Seca digital scale<br><b>height</b> measured using portable Seca 213 Leicester stadiometer<br><b>WC</b> and <b>HC</b> measured using non-stretchable Seca 201 Ergonomic Circumference Measuring tape |
| # of time points measured          |                             |                             |                                          | $\geq$ 15                                                                        |                                         | 1                                                                                |                             | 3                                                                                                                                                                                                                                 |
| Reporting of chronic NCD           |                             |                             |                                          | baseline prevalence                                                              |                                         | prevalence at baseline                                                           |                             | baseline prevalence                                                                                                                                                                                                               |
| Estimate in total sample           |                             |                             |                                          | 0.18                                                                             |                                         | not reported                                                                     |                             | 0.526                                                                                                                                                                                                                             |
| Associated risk factor(s) reported |                             |                             |                                          | none reported                                                                    |                                         | ethnicity, age                                                                   |                             | protease inhibitor                                                                                                                                                                                                                |

| Name of cohort            | Basotho Gold Miners Cohort | TLC Cohort Study                                                                                    | Cohort of HIV-infected, ART-naïve adults                                                                                                                                                                         | Operational cohort of treatment naïve HIV-infected men and women | Prospective cohort of nulliparous women | ABC-DO Study     | HARP Study       | CoLTART Study containing regimens                                                                                                        |
|---------------------------|----------------------------|-----------------------------------------------------------------------------------------------------|------------------------------------------------------------------------------------------------------------------------------------------------------------------------------------------------------------------|------------------------------------------------------------------|-----------------------------------------|------------------|------------------|------------------------------------------------------------------------------------------------------------------------------------------|
| CKD definition            | CKD not measured           | CKD defined eGFR as mildly (60-89ml/min), moderately (30-59ml/min), or severely reduced (<30ml/min) | <b>renal insufficiency</b> defined eGFR as mildly (60-89ml/min), moderately (30-59ml/min), or severely reduced (<30ml/min) or creatinine clearance as mild (121-150mmol/L), moderate (151-200), or severe (>200) | CKD not measured                                                 | CKD not measured                        | CKD not measured | CKD not measured | <b>abnormal renal function</b> defined as serum urea >11.9mmol/L or serum creatinine >109µmol/L                                          |
| Source of measurement     |                            | eGFR estimated using Cockcroft-Gault                                                                | eGFR estimated from creatinine clearance prior to ART initiation; performed secondary analysis using MDRD and serum creatinine levels alone                                                                      |                                                                  |                                         |                  |                  | <b>serum urea</b> measured using Cobas Integra 400 plus<br><b>creatinine</b> measured from mid-stream urine using Roche Integra 400 plus |
| # of time points measured |                            | 14-56                                                                                               | 1                                                                                                                                                                                                                |                                                                  |                                         |                  |                  | 3                                                                                                                                        |

| Name of cohort                     | Basotho Gold Miners Cohort | TLC Cohort Study                                | Cohort of HIV-infected, ART-naïve adults | Operational cohort of treatment naïve HIV-infected men and women | Prospective cohort of nulliparous women | ABC-DO Study                                              | HARP Study                                                                                                                            | CoLTART Study      |
|------------------------------------|----------------------------|-------------------------------------------------|------------------------------------------|------------------------------------------------------------------|-----------------------------------------|-----------------------------------------------------------|---------------------------------------------------------------------------------------------------------------------------------------|--------------------|
| Reporting of chronic NCD           |                            | 48mo prevalence                                 | prevalence                               |                                                                  |                                         |                                                           |                                                                                                                                       | overall prevalence |
| Estimate in total sample           |                            | mortality mild (30.4) moderate (5.2) severe (0) | 34                                       |                                                                  |                                         |                                                           |                                                                                                                                       | 0.006              |
| Associated risk factor(s) reported |                            | nephrotoxicity                                  | none reported                            |                                                                  |                                         |                                                           |                                                                                                                                       | none reported      |
| Cancer definition                  | Not measured               | Not measured                                    | Not measured                             | CC defined using 2001 Bethesda system                            | Not measured                            | BC defined using histological or cytological confirmation | CC defined using histology as 'negative' ( $\leq$ CIN1) or 'positive' (CIN2+)                                                         | Not measured       |
| Source of measurement              |                            |                                                 |                                          | conventional pap smears performed                                |                                         | obtained from medical records                             | cervical samples collected using cytobrush, assessed clinically using VIA or Lugol's iodine; all participants referred for colposcopy |                    |

| Name of cohort                     | Basotho Gold Miners Cohort                                                                                                   | TLC Cohort Study         | Cohort of HIV-infected, ART-naïve adults | Operational cohort of treatment naïve HIV-infected men and women | Prospective cohort of nulliparous women | ABC-DO Study                                                                                 | HARP Study               | CoLTART Study            |
|------------------------------------|------------------------------------------------------------------------------------------------------------------------------|--------------------------|------------------------------------------|------------------------------------------------------------------|-----------------------------------------|----------------------------------------------------------------------------------------------|--------------------------|--------------------------|
| # of time points measured          |                                                                                                                              |                          |                                          | ≥2                                                               |                                         | 1                                                                                            | 2                        |                          |
| Reporting of chronic NCD           |                                                                                                                              |                          |                                          | baseline prevalence                                              |                                         | Not applicable; all participants had BC at baseline                                          | cumulative incidence     |                          |
| Estimate in total sample           |                                                                                                                              |                          |                                          | progression from normal to LSIL or HSIL<br>38%                   |                                         | NA                                                                                           | BF (1.2)<br>SA (5.8)     |                          |
| Associated risk factor(s) reported |                                                                                                                              |                          |                                          | 4.6/100pys<br>CD4<200                                            |                                         | ethnicity, education, having never heard of BC, employment, pregnancy in past 3yrs, age, SES | ART                      |                          |
| <b>COPD definition</b>             | <b>COPD</b> defined using GOLD staging system; Grade 0: FEV1/FVC ratio ≥0.7 and respiratory symptoms (cough and sputum ≥3mo) | <b>COPD</b> not measured | <b>COPD</b> not measured                 | <b>COPD</b> not measured                                         | <b>COPD</b> not measured                | <b>COPD</b> defined as yes/no                                                                | <b>COPD</b> not measured | <b>COPD</b> not measured |



| Name of cohort                     | Basotho Gold Miners Cohort                                                                                                                                                                                                       | TLC Cohort Study | Cohort of HIV-infected, ART-naïve adults | Operational cohort of treatment naïve HIV-infected men and women | Prospective cohort of nulliparous women | ABC-DO Study  | HARP Study | CoLTART Study |
|------------------------------------|----------------------------------------------------------------------------------------------------------------------------------------------------------------------------------------------------------------------------------|------------------|------------------------------------------|------------------------------------------------------------------|-----------------------------------------|---------------|------------|---------------|
| Source of measurement              | <p><b>spirometry</b> measured without bronchodilation using Hands Rudolph pneumotachograph</p> <p><b>symptom questionnaire</b> included duration of respiratory symptoms, medical history, past/present TB, smoking, alcohol</p> |                  |                                          |                                                                  |                                         | questionnaire |            |               |
| # of time points measured          | 2                                                                                                                                                                                                                                |                  |                                          |                                                                  |                                         | 1             |            |               |
| Reporting of chronic NCD           | mean decline in FEV1                                                                                                                                                                                                             |                  |                                          |                                                                  |                                         | not reported  |            |               |
| Estimate in total sample           | <p>mortality</p> <p>91ml(67-116)</p> <p>18</p>                                                                                                                                                                                   |                  |                                          |                                                                  |                                         |               |            |               |
| Associated risk factor(s) reported | age, years of employment, history of TB, active baseline TB, silicosis at                                                                                                                                                        |                  |                                          |                                                                  |                                         |               |            |               |

|                       |                                   |                         |                                                 |                                                                         |                                                |                     |                   |                      |
|-----------------------|-----------------------------------|-------------------------|-------------------------------------------------|-------------------------------------------------------------------------|------------------------------------------------|---------------------|-------------------|----------------------|
| <b>Name of cohort</b> | <b>Basotho Gold Miners Cohort</b> | <b>TLC Cohort Study</b> | <b>Cohort of HIV-infected, ART-naïve adults</b> | <b>Operational cohort of treatment naïve HIV-infected men and women</b> | <b>Prospective cohort of nulliparous women</b> | <b>ABC-DO Study</b> | <b>HARP Study</b> | <b>CoLTART Study</b> |
|                       | baseline and follow-up            |                         |                                                 |                                                                         |                                                |                     |                   |                      |

eGFR: estimated glomerular filtration rate; BP: blood pressure; WC: waist-circumference; PA: physical activity; BC: breast cancer; CC: cervical cancer; IDF: International Diabetes Federation; GOLD: Global Initiative for Chronic Obstructive Lung Disease; ART: antiretroviral therapy; AJCC: American Joint Committee on Cancer; TNM: Classification of Tumour Malignancy; HIV $\emptyset$ : HIV negative; VIA: visual inspection with acetic acid; TB: tuberculosis

STable 6d continued: Characteristics of chronic NCD data of included studies with adults aged >18 years, sampled from occupational and clinical populations

| Name of cohort                     | Prospective cohort study in Ghana                                                                                                                                                                                             | RWISA                                 | Prospective cohort study in Benin                                                                                                                                 | UARTO cohort                                                                                                                                                         |
|------------------------------------|-------------------------------------------------------------------------------------------------------------------------------------------------------------------------------------------------------------------------------|---------------------------------------|-------------------------------------------------------------------------------------------------------------------------------------------------------------------|----------------------------------------------------------------------------------------------------------------------------------------------------------------------|
| Hypertension definition            | <b>gestational hypertension</b> defined as hypertension that develops after 20th gestation wk without proteinuria and if returns to normal in postpartum<br><b>pre-eclampsia</b> defined as both hypertension and proteinuria | <b>hypertension</b> defined as yes/no | <b>gestational hypertension</b> defined as BP $\geq 140/90$ or increase in SBP $>30$ or DBP $>15$ with $\geq 1$ other sign of severity such as convulsion or coma | <b>hypertension</b> defined as SBP $\geq 140$ and/or DBP $\geq 90$ one 3 consecutive visits or self-reported use of antihypertensive medication after ART initiation |
| Source of measurement              | <b>BP</b> measurement not reported                                                                                                                                                                                            | questionnaire                         | <b>BP</b> measurement not reported                                                                                                                                | <b>BP</b> measured using aneroid sphygmomanometer (Welch Allyn Tycos 767)                                                                                            |
| # of time points measured          | $\geq 2$                                                                                                                                                                                                                      | $\geq 2$                              | 2                                                                                                                                                                 | $\geq 3$                                                                                                                                                             |
| Reporting of chronic NCD           | incidence                                                                                                                                                                                                                     | baseline prevalence                   | prevalence at 6mo<br>prevalence at 12mo                                                                                                                           | increase in SBP per year                                                                                                                                             |
| Estimate in total sample           | 7.5                                                                                                                                                                                                                           | HIV+ (4.8)<br>HIV $\emptyset$ (8.3)   | 8<br>3                                                                                                                                                            | 9.6mmHg/year                                                                                                                                                         |
| Associated risk factor(s) reported | none reported                                                                                                                                                                                                                 | none reported                         | none reported                                                                                                                                                     | age, sex, overweight, CD4 $<100$                                                                                                                                     |
| Diabetes definition                | <b>diabetes</b> not measured                                                                                                                                                                                                  | <b>diabetes</b> not measured          | <b>diabetes</b> not measured                                                                                                                                      | <b>diabetes</b> not measured                                                                                                                                         |
| Source of measurement              |                                                                                                                                                                                                                               |                                       |                                                                                                                                                                   |                                                                                                                                                                      |
| # of time points measured          |                                                                                                                                                                                                                               |                                       |                                                                                                                                                                   |                                                                                                                                                                      |
| Reporting of chronic NCD           |                                                                                                                                                                                                                               |                                       |                                                                                                                                                                   |                                                                                                                                                                      |
| Estimate in total sample           |                                                                                                                                                                                                                               |                                       |                                                                                                                                                                   |                                                                                                                                                                      |
| Associated risk factor(s) reported |                                                                                                                                                                                                                               |                                       |                                                                                                                                                                   |                                                                                                                                                                      |
| Obesity definition                 | <b>obesity</b> not measured                                                                                                                                                                                                   | <b>obesity</b> not measured           | <b>obesity</b> not measured                                                                                                                                       | <b>obesity</b> defined as BMI $\geq 30$                                                                                                                              |

| Name of cohort                     | Prospective cohort study in Ghana | RWISA                    | Prospective cohort study in Benin | UARTO cohort                                                                                                                                                             |
|------------------------------------|-----------------------------------|--------------------------|-----------------------------------|--------------------------------------------------------------------------------------------------------------------------------------------------------------------------|
| Source of measurement              |                                   |                          |                                   | <b>weight</b> measured to nearest 1Kg with Seca 762 and participants wearing light clothing, no shoes<br><b>height</b> measured to nearest 0.1cm with Seca 206, no shoes |
| # of time points measured          |                                   |                          |                                   | ≥3                                                                                                                                                                       |
| Reporting of chronic NCD           |                                   |                          |                                   | baseline prevalence                                                                                                                                                      |
| Estimate in total sample           |                                   |                          |                                   | 0.026                                                                                                                                                                    |
| Associated risk factor(s) reported |                                   |                          |                                   | none reported                                                                                                                                                            |
| CKD definition                     | <b>CKD</b> not measured           | <b>CKD</b> not measured  | <b>CKD</b> not measured           | <b>CKD</b> not measured                                                                                                                                                  |
| Source of measurement              |                                   |                          |                                   |                                                                                                                                                                          |
| # of time points measured          |                                   |                          |                                   |                                                                                                                                                                          |
| Reporting of chronic NCD           |                                   |                          |                                   |                                                                                                                                                                          |
| Estimate in total sample           |                                   |                          |                                   |                                                                                                                                                                          |
| Associated risk factor(s) reported |                                   |                          |                                   |                                                                                                                                                                          |
| Cancer definition                  | Not measured                      | Not measured             | Not measured                      | Not measured                                                                                                                                                             |
| Source of measurement              |                                   |                          |                                   |                                                                                                                                                                          |
| # of time points measured          |                                   |                          |                                   |                                                                                                                                                                          |
| Reporting of chronic NCD           |                                   |                          |                                   |                                                                                                                                                                          |
| Estimate in total sample           |                                   |                          |                                   |                                                                                                                                                                          |
| Associated risk factor(s) reported |                                   |                          |                                   |                                                                                                                                                                          |
| COPD definition                    | <b>COPD</b> not measured          | <b>COPD</b> not measured | <b>COPD</b> not measured          | <b>COPD</b> not measured                                                                                                                                                 |
| Source of measurement              |                                   |                          |                                   |                                                                                                                                                                          |
| # of time points measured          |                                   |                          |                                   |                                                                                                                                                                          |
| Reporting of chronic NCD           |                                   |                          |                                   |                                                                                                                                                                          |
| Estimate in total sample           |                                   |                          |                                   |                                                                                                                                                                          |
| Associated risk factor(s) reported |                                   |                          |                                   |                                                                                                                                                                          |

STable 7a: Characteristics of risk factor data of included studies with children and young adults aged <20 years, sampled from general populations

| Name of cohort                                        | BT20                                                                                                                       | Seychelles Child Development Study                                                                                        | Lungwena Child Survival Study                    |
|-------------------------------------------------------|----------------------------------------------------------------------------------------------------------------------------|---------------------------------------------------------------------------------------------------------------------------|--------------------------------------------------|
| <b>Demographic &amp; Environmental Risk Factor(s)</b> |                                                                                                                            |                                                                                                                           |                                                  |
| <b>Education definition</b>                           | <b>education</b> definition not reported                                                                                   | <b>highest of parents' occupations</b> defined as non-manual skilled; intermediate skilled; other                         | <b>SES</b> not defined                           |
| <b>Source of measurement</b>                          | questionnaire                                                                                                              | not reported                                                                                                              | asset score initially derived based on HH assets |
| <b># of time points measured</b>                      | 5                                                                                                                          | 1                                                                                                                         | 1                                                |
| <b>Occupation definition</b>                          | <b>occupation</b> definition not reported                                                                                  | Not measured                                                                                                              | Not measured                                     |
| <b>Source of measurement</b>                          | questionnaire                                                                                                              |                                                                                                                           |                                                  |
| <b># of time points measured</b>                      | 5                                                                                                                          |                                                                                                                           |                                                  |
| <b>SES definition</b>                                 | <b>SES</b> defined as low, middle, and high tertiles; measured using a physical asset-based household SES measurement tool | Not measured                                                                                                              | Not measured                                     |
| <b>Source of measurement</b>                          | questionnaire                                                                                                              |                                                                                                                           |                                                  |
| <b># of time points measured</b>                      | 2                                                                                                                          |                                                                                                                           |                                                  |
| <b>Environmental Risk Factor(s)</b>                   |                                                                                                                            |                                                                                                                           |                                                  |
| <b>Definition</b>                                     | Not measured                                                                                                               | Not measured                                                                                                              | Not measured                                     |
| <b>Source of measurement</b>                          |                                                                                                                            |                                                                                                                           |                                                  |
| <b># of time points measured</b>                      |                                                                                                                            |                                                                                                                           |                                                  |
| <b>Lifestyle Risk Factor(s)</b>                       |                                                                                                                            |                                                                                                                           |                                                  |
| <b>Smoking status definition</b>                      | <b>smoking status</b> definition not reported                                                                              | Not measured                                                                                                              | Not measured                                     |
| <b>Source of measurement</b>                          | questionnaire                                                                                                              |                                                                                                                           |                                                  |
| <b># of time points measured</b>                      | ≥3                                                                                                                         |                                                                                                                           |                                                  |
| <b>Alcohol use definition</b>                         | <b>alcohol use</b> definition not reported                                                                                 | Not measured                                                                                                              | Not measured                                     |
| <b>Source of measurement</b>                          | questionnaire                                                                                                              |                                                                                                                           |                                                  |
| <b># of time points measured</b>                      | ≥3                                                                                                                         |                                                                                                                           |                                                  |
| <b>Poor diet definition</b>                           | <b>poor diet</b> definition not reported                                                                                   | <b>infant weaning</b> defined as appropriate when weaning porridges introduced only after 2mo and family foods before 7mo | Not measured                                     |
| <b>Source of measurement</b>                          | measured from longitudinal food frequency analyses using questionnaire data on what/how often foods eaten                  | structured questionnaire used to interview guardian about food items given to infant                                      |                                                  |

| Name of cohort                 | BT20                                                                                         | Seychelles Child Development Study       | Lungwena Child Survival Study                                                                                             |
|--------------------------------|----------------------------------------------------------------------------------------------|------------------------------------------|---------------------------------------------------------------------------------------------------------------------------|
| # of time points measured      | 6                                                                                            | 1                                        |                                                                                                                           |
| Physical inactivity definition |                                                                                              |                                          |                                                                                                                           |
| Source of measurement          | Not measured                                                                                 | Not measured                             | Not measured                                                                                                              |
| # of time points measured      |                                                                                              |                                          |                                                                                                                           |
| Breastfeeding definition       | <b>breastfeeding</b> definition not reported                                                 | Not measured                             | <b>breastfeeding</b> infants considered "exclusively breastfed" until date they received something other than breast milk |
| Source of measurement          | not reported                                                                                 |                                          | structured questionnaire used to interview guardian about food items given to infant                                      |
| # of time points measured      | 6                                                                                            |                                          | 1                                                                                                                         |
| Puberty definition             | <b>age at menarche</b> for females and age of transition from Tanner 1 to Tanner 2 for males | Not measured                             | Not measured                                                                                                              |
| Source of measurement          | questionnaire                                                                                |                                          |                                                                                                                           |
| # of time points measured      | 1                                                                                            |                                          |                                                                                                                           |
| Sexual behaviour definition    | Not measured                                                                                 | Not measured                             | Not measured                                                                                                              |
| Source of measurement          |                                                                                              |                                          |                                                                                                                           |
| # of time points measured      |                                                                                              |                                          |                                                                                                                           |
| Physiological Risk Factor(s)   |                                                                                              |                                          |                                                                                                                           |
| Birthweight status definition  | <b>birthweight</b> definition not reported                                                   | <b>birthweight</b> child weight at birth | Not measured                                                                                                              |
| Source of measurement          | obtained from hospital records                                                               | obtained from medical records            |                                                                                                                           |
| # of time points measured      | 1                                                                                            | 1                                        |                                                                                                                           |
| Body composition definition    | <b>body composition</b> defined using whole-body fat and fat-free mass                       | Not measured                             | Not measured                                                                                                              |
| Source of measurement          | <b>DXA</b> measured according to OSCD using Hologic QDR 4500A                                |                                          |                                                                                                                           |
| # of time points measured      | 7                                                                                            |                                          |                                                                                                                           |
| Cholesterol definition         | <b>abnormal lipids</b> definition not reported                                               | Not measured                             | Not measured                                                                                                              |
| Source of measurement          | not reported                                                                                 |                                          |                                                                                                                           |
| # of time points measured      | 3                                                                                            |                                          |                                                                                                                           |
| Proteinuria definition         | Not measured                                                                                 | Not measured                             | Not measured                                                                                                              |
| Source of measurement          |                                                                                              |                                          |                                                                                                                           |
| # of time points measured      |                                                                                              |                                          |                                                                                                                           |
| HIV infection definition       | <b>HIV infection</b> definition not reported                                                 | Not measured                             | Not measured                                                                                                              |
| Source of measurement          | not reported                                                                                 |                                          |                                                                                                                           |
| # of time points measured      | 1                                                                                            |                                          |                                                                                                                           |

| Name of cohort            | BT20         | Seychelles Child Development Study | Lungwena Child Survival Study |
|---------------------------|--------------|------------------------------------|-------------------------------|
| TB infection definition   | Not measured | Not measured                       | Not measured                  |
| Source of measurement     |              |                                    |                               |
| # of time points measured |              |                                    |                               |
| Anaemia definition        | Not measured | Not measured                       | Not measured                  |
| Source of measurement     |              |                                    |                               |
| # of time points measured |              |                                    |                               |

SES: socio-economic status; HH: household; ISCD: International Society of Clinical Densitometry

STable 7b: Characteristics of risk factor data of included studies with mixed (children and adults) populations, sampled from general and clinical populations

| Name of cohort                                        | RCCS                                                                                                                         | Kiang West Longitudinal Population Study                                    | GPC                                                                                                           | Bukavu Observ Study                                                                                                                              | Ellisras Longitudinal Study                                   | Mildmay Uganda Cohort                                              | Prospective cohort study in Sudan |
|-------------------------------------------------------|------------------------------------------------------------------------------------------------------------------------------|-----------------------------------------------------------------------------|---------------------------------------------------------------------------------------------------------------|--------------------------------------------------------------------------------------------------------------------------------------------------|---------------------------------------------------------------|--------------------------------------------------------------------|-----------------------------------|
| <b>Demographic &amp; Environmental Risk Factor(s)</b> |                                                                                                                              |                                                                             |                                                                                                               |                                                                                                                                                  |                                                               |                                                                    |                                   |
| <b>Education definition</b>                           | <b>education</b> defined as none; primary; secondary; tertiary                                                               | <b>education</b> for those aged ≥18yrs, defined as attended ≥primary school | <b>education</b> defined as less than primary; incomplete primary; primary; junior/secondary; above secondary | <b>education level (yrs)</b> defined as 0, 1-6 (some or completed primary), 7-12 (some or completed secondary), ≥13 (some or completed tertiary) | <b>education</b> defined as primary or secondary              | <b>education</b> defined as high school or higher; primary or less | Not measured                      |
| Source of measurement                                 | questionnaire                                                                                                                | not reported                                                                | questionnaire                                                                                                 | questionnaire                                                                                                                                    | not reported                                                  | not reported                                                       |                                   |
| # of time points measured                             | 11                                                                                                                           | ≥1                                                                          | 13                                                                                                            | 2                                                                                                                                                | ≥1                                                            | ≥1                                                                 |                                   |
| <b>Occupation definition</b>                          | <b>occupation</b> defined as agricultural/house work; bar/restaurant; boda boda/trucking; student; trader/shop keeper; other | Not measured                                                                | Not measured                                                                                                  | Not measured                                                                                                                                     | <b>occupation</b> defined as 'yes' if employed or 'no' if not | Not measured                                                       | Not measured                      |
| Source of measurement                                 | questionnaire                                                                                                                |                                                                             |                                                                                                               |                                                                                                                                                  | questionnaire                                                 |                                                                    |                                   |
| # of time points measured                             | 11                                                                                                                           |                                                                             |                                                                                                               |                                                                                                                                                  | 1                                                             |                                                                    |                                   |



| Name of cohort                           | RCCS                                                                                            | Kiang West Longitudinal Population Study | GPC                                                                                             | Bukavu Observ Study                           | Ellisras Longitudinal Study | Mildmay Uganda Cohort | Prospective cohort study in Sudan |
|------------------------------------------|-------------------------------------------------------------------------------------------------|------------------------------------------|-------------------------------------------------------------------------------------------------|-----------------------------------------------|-----------------------------|-----------------------|-----------------------------------|
| <b>SES definition</b>                    | Not measured                                                                                    | Not measured                             | <b>SES</b> defined as low, middle, and high tertiles of an asset index                          | <b>SES</b> definition not reported            | Not measured                | Not measured          | Not measured                      |
| Source of measurement                    |                                                                                                 |                                          | questionnaire                                                                                   | measured from yearly census-like surveys      |                             |                       |                                   |
| # of time points measured                |                                                                                                 |                                          | 1                                                                                               | 3                                             |                             |                       |                                   |
| <b>Environmental exposure definition</b> | <b>aflatoxin exposure</b> defined using AFB-Lys adducts in HIV negative participants            | Not measured                             | <b>aflatoxin exposure</b> defined using AFB-Lys adducts in HIV negative participants            | Not measured                                  | Not measured                | Not measured          | Not measured                      |
| Source of measurement                    | randomly selected archived serum samples to analyse using Agilent 1200 HPLC-fluorescence system |                                          | randomly selected archived serum samples to analyse using Agilent 1200 HPLC-fluorescence system |                                               |                             |                       |                                   |
| # of time points measured                | 4                                                                                               |                                          | 8                                                                                               |                                               |                             |                       |                                   |
| <b>Lifestyle Risk Factor(s)</b>          |                                                                                                 |                                          |                                                                                                 |                                               |                             |                       |                                   |
| <b>Smoking status definition</b>         | Not measured                                                                                    | Not measured                             | <b>smoking status</b> defined using past, current and frequency                                 | <b>smoking status</b> definition not reported | Not measured                | Not measured          | Not measured                      |
| Source of measurement                    |                                                                                                 |                                          | collected using WHO STEPwise questionnaire                                                      | collected using WHO STEPwise questionnaire    |                             |                       |                                   |

| Name of cohort                 | RCCS         | Kiang West Longitudinal Population Study | GPC                                                                                                                                                       | Bukavu Observ Study                                                               | Ellisras Longitudinal Study                                  | Mildmay Uganda Cohort                 | Prospective cohort study in Sudan |
|--------------------------------|--------------|------------------------------------------|-----------------------------------------------------------------------------------------------------------------------------------------------------------|-----------------------------------------------------------------------------------|--------------------------------------------------------------|---------------------------------------|-----------------------------------|
| # of time points measured      |              |                                          | 1                                                                                                                                                         | 3                                                                                 |                                                              |                                       |                                   |
| Alcohol use definition         | Not measured | Not measured                             | <b>alcohol use</b> defined using past, current and frequency                                                                                              | <b>alcohol use</b> definition not reported                                        | Not measured                                                 | <b>alcohol use</b> defined as yes; no | Not measured                      |
| Source of measurement          |              |                                          | collected using WHO STEPwise questionnaire                                                                                                                | collected using WHO STEPwise questionnaire                                        |                                                              | questionnaire                         |                                   |
| # of time points measured      |              |                                          | 1                                                                                                                                                         | 3                                                                                 |                                                              | ~42                                   |                                   |
| Poor diet definition           | Not measured | Not measured                             | <b>insufficient fruit and veg consumption</b> defined as <5 servings of fruit or vegs a day<br><b>high staple consumption</b> defined as >75th percentile | <b>poor diet</b> definition not reported                                          | <b>diet</b> definition not reported                          | Not measured                          | Not measured                      |
| Source of measurement          |              |                                          | collected using WHO STEPwise questionnaire                                                                                                                | collected using WHO STEPwise questionnaire                                        | measured using 24hr recall; average of 2- 24h dietary intake |                                       |                                   |
| # of time points measured      |              |                                          | 1                                                                                                                                                         | 3                                                                                 | 1                                                            |                                       |                                   |
| Physical inactivity definition | Not measured | Not measured                             | Not measured                                                                                                                                              | <b>moderate PA</b> defined as walking fast for ≥10 min or displacement by bicycle | <b>inactive PA</b> defined as <600MET-min/wk                 | Not measured                          | Not measured                      |

| Name of cohort                  | RCCS         | Kiang West Longitudinal Population Study | GPC                                            | Bukavu Observ Study                        | Ellisras Longitudinal Study                                                                                    | Mildmay Uganda Cohort | Prospective cohort study in Sudan |
|---------------------------------|--------------|------------------------------------------|------------------------------------------------|--------------------------------------------|----------------------------------------------------------------------------------------------------------------|-----------------------|-----------------------------------|
| Source of measurement           |              |                                          |                                                | collected using WHO STEPwise questionnaire | collected using IPAQ                                                                                           |                       |                                   |
| # of time points measured       |              |                                          |                                                | 3                                          | 1                                                                                                              |                       |                                   |
| <b>Breastfeeding definition</b> | Not measured | Not measured                             | <b>breastfeeding</b> definition not reported   | Not measured                               | Not measured                                                                                                   | Not measured          | Not measured                      |
| Source of measurement           |              |                                          | not reported                                   |                                            |                                                                                                                |                       |                                   |
| # of time points measured       |              |                                          | 16                                             |                                            |                                                                                                                |                       |                                   |
| <b>Puberty definition</b>       | Not measured | Not measured                             | <b>age at menarche</b> definition not reported | Not measured                               | <b>puberty</b> defined using Tanner rating scale pictures ranging from 1 (no development) to 5 (matured stage) | Not measured          | Not measured                      |
| Source of measurement           |              |                                          | not reported                                   |                                            | breast development and genital/pubic hair development stages assessed by visual inspection                     |                       |                                   |
| # of time points measured       |              |                                          | not reported                                   |                                            | 1                                                                                                              |                       |                                   |

| Name of cohort                       | RCCS                                                                                                                                                                                                                                                    | Kiang West Longitudinal Population Study         | GPC                                             | Bukavu Observ Study | Ellisras Longitudinal Study                | Mildmay Uganda Cohort                                     | Prospective cohort study in Sudan |
|--------------------------------------|---------------------------------------------------------------------------------------------------------------------------------------------------------------------------------------------------------------------------------------------------------|--------------------------------------------------|-------------------------------------------------|---------------------|--------------------------------------------|-----------------------------------------------------------|-----------------------------------|
| <b>Sexual behaviour definition</b>   | <b>sexual behaviour</b> in past yr defined as sexually active; multiple partners; non-marital partners among married persons; used alcohol before sex; sex with partner outside community; consistent condom use with non-marital partner questionnaire | Not measured                                     | <b>sexual behaviour</b> definition not reported | Not measured        | Not measured                               | <b>sexual behaviour</b> defined as sexually active or not | Not measured                      |
| Source of measurement                | questionnaire                                                                                                                                                                                                                                           |                                                  | self-reported                                   |                     |                                            | not reported                                              |                                   |
| # of time points measured            | 11                                                                                                                                                                                                                                                      |                                                  | 18                                              |                     |                                            | ≥1                                                        |                                   |
| <b>Physiological Risk Factor(s)</b>  |                                                                                                                                                                                                                                                         |                                                  |                                                 |                     |                                            |                                                           |                                   |
| <b>Birthweight status definition</b> | Not measured                                                                                                                                                                                                                                            | <b>birthweight</b> definition not reported       | Not measured                                    | Not measured        | <b>birthweight</b> definition not reported | Not measured                                              | Not measured                      |
| Source of measurement                |                                                                                                                                                                                                                                                         | recorded to the nearest 10g within 72hr of birth |                                                 |                     | recorded from immunization cards           |                                                           |                                   |
| # of time points measured            |                                                                                                                                                                                                                                                         | 1                                                |                                                 |                     | 1                                          |                                                           |                                   |
| <b>Body composition definition</b>   | Not measured                                                                                                                                                                                                                                            | <b>body composition</b> definition not reported  | Not measured                                    | Not measured        | Not measured                               | Not measured                                              | Not measured                      |

| Name of cohort                  | RCCS                                                 | Kiang West Longitudinal Population Study                    | GPC                                                                                                                              | Bukavu Observ Study                            | Ellisras Longitudinal Study | Mildmay Uganda Cohort                    | Prospective cohort study in Sudan |
|---------------------------------|------------------------------------------------------|-------------------------------------------------------------|----------------------------------------------------------------------------------------------------------------------------------|------------------------------------------------|-----------------------------|------------------------------------------|-----------------------------------|
| Source of measurement           |                                                      | measured using digital bioimpedance analysis scale (Tanita) |                                                                                                                                  |                                                |                             |                                          |                                   |
| # of time points measured       |                                                      | ≥12                                                         |                                                                                                                                  |                                                |                             |                                          |                                   |
| <b>Cholesterol definition</b>   | Not measured                                         | Not measured                                                | <b>abnormal lipids</b> defined as raised total-C >5.2mmol/l, low HDL-C <1.0 (males) or <1.3 (females), raised triglycerides >1.7 | <b>abnormal lipids</b> definition not reported | Not measured                | <b>lipids</b> defined using Total-C, HDL | Not measured                      |
| Source of measurement           |                                                      |                                                             | <b>lipid</b> measurement not reported                                                                                            | <b>lipids</b> measured from 4 mL of blood      |                             | <b>lipid</b> measurement not reported    |                                   |
| # of time points measured       |                                                      |                                                             | 1                                                                                                                                | 1                                              |                             | ≥1                                       |                                   |
| <b>Proteinuria definition</b>   | Not measured                                         |                                                             |                                                                                                                                  | <b>proteinuria</b> definition not reported     |                             | testing not reported                     |                                   |
| Source of measurement           |                                                      |                                                             |                                                                                                                                  | qualitative proteinuria by dipstick            |                             | ≥1                                       |                                   |
| # of time points measured       |                                                      |                                                             |                                                                                                                                  | 1                                              |                             |                                          |                                   |
| <b>HIV infection definition</b> | <b>HIV infection</b> defined as positive or negative |                                                             | <b>HIV infection</b> defined as positive if 3 of 3 tests are positive                                                            |                                                |                             |                                          |                                   |

| Name of cohort            | RCCS                                                                                         | Kiang West Longitudinal Population Study                                                                                                   | GPC                                                                                                                                                    | Bukavu Observ Study | Ellisras Longitudinal Study | Mildmay Uganda Cohort                                                                                  | Prospective cohort study in Sudan              |
|---------------------------|----------------------------------------------------------------------------------------------|--------------------------------------------------------------------------------------------------------------------------------------------|--------------------------------------------------------------------------------------------------------------------------------------------------------|---------------------|-----------------------------|--------------------------------------------------------------------------------------------------------|------------------------------------------------|
| Source of measurement     | finger stick for rapid testing; venous blood tested with ELISA and confirmed by western blot |                                                                                                                                            | 1) tested using rapid testing algorithm 2) retested with 1/2 Stat-Pak 3) evaluated with Uni-Gold Recombinant HIV-1/2;                                  |                     |                             |                                                                                                        |                                                |
| # of time points measured | 11                                                                                           |                                                                                                                                            | 22                                                                                                                                                     |                     |                             |                                                                                                        |                                                |
| TB infection definition   | Not measured                                                                                 |                                                                                                                                            |                                                                                                                                                        |                     |                             | <b>current TB infection</b> defined as no signs on treatmentl under investigation testing not reported |                                                |
| Source of measurement     |                                                                                              |                                                                                                                                            |                                                                                                                                                        |                     |                             | ≥1                                                                                                     |                                                |
| # of time points measured |                                                                                              |                                                                                                                                            |                                                                                                                                                        |                     |                             |                                                                                                        |                                                |
| Anaemia definition        | Not measured                                                                                 | <b>anaemia</b> defined using WHO criteria: 6-59 months ≤11; 5-11yrs ≤11.5; 12-14 ≤12; non pregnant women ≤12; pregnant women ≤11; men ≤13" | <b>anaemia</b> defined using the WHO criteria: mild ≥110 to <130 in males or ≥110 to <120 in females; moderate ≥80 to <110 in both; severe <80 in both |                     |                             |                                                                                                        | <b>anaemia</b> definition not reported         |
| Source of measurement     |                                                                                              | <b>Hb</b> measured by Medonic M-series 3-part haematology                                                                                  | <b>Hb</b> measured using Coulter AC.T 5 Diff CP analyser                                                                                               |                     |                             |                                                                                                        | <b>Hb levels</b> obtained from medical records |

| Name of cohort            | RCCS | Kiang West Longitudinal Population Study | GPC | Bukavu Observ Study | Ellisras Longitudinal Study | Mildmay Uganda Cohort | Prospective cohort study in Sudan |
|---------------------------|------|------------------------------------------|-----|---------------------|-----------------------------|-----------------------|-----------------------------------|
|                           |      | analyser or HemoCue                      |     |                     |                             |                       |                                   |
| # of time points measured |      | ≥12                                      | 8   |                     |                             |                       | 2                                 |

SES: socio-economic status; HH: household; Hb: haemoglobin; PA: physical activity; IPAQ: International Physical Activity Questionnaire; TB: tuberculosis

STable 7c: Characteristics of risk factor data of included studies with adults aged >18 years, sampled from general populations

| Name of cohort                                        | ACCME's HPV and Cervical Cancer Study                                                                 | AWI-Gen                                   | HAALSI                                                                                      | NCD Intervention Programme                        | DUCS-HTN                                                                 | Ibadan Study of Aging | Prospective Cohort in Democratic Republic of Congo | The Benin Study                                                       |
|-------------------------------------------------------|-------------------------------------------------------------------------------------------------------|-------------------------------------------|---------------------------------------------------------------------------------------------|---------------------------------------------------|--------------------------------------------------------------------------|-----------------------|----------------------------------------------------|-----------------------------------------------------------------------|
| <b>Demographic &amp; Environmental Risk Factor(s)</b> |                                                                                                       |                                           |                                                                                             |                                                   |                                                                          |                       |                                                    |                                                                       |
| <b>Education definition</b>                           | <b>education</b> defined as no formal schooling; primary; secondary; university; postgraduate         | <b>education</b> definition not reported  | <b>education</b> defined as no formal schooling; primary; some secondary; secondary or more | <b>education</b> defined as ≤3yrs; 4-9yrs; ≥10yrs | <b>education</b> defined as none; ≥some primary; ≥some secondary         | Not measured          | Not measured                                       | <b>education</b> defined as no schooling; primary school; high school |
| Source of measurement                                 | questionnaire                                                                                         | questionnaire                             | questionnaire                                                                               | questionnaire                                     | questionnaire                                                            |                       |                                                    | questionnaire                                                         |
| # of time points measured                             | 1                                                                                                     | 1                                         | ≥8                                                                                          | ≥1                                                | 1                                                                        |                       |                                                    | ≥1                                                                    |
| <b>Occupation definition</b>                          | <b>occupation</b> defined as professional; self-employed; manual; skilled manual; student; unemployed | <b>occupation</b> definition not reported | <b>occupation</b> defined as employed; unemployed; homemaker                                | Not measured                                      | <b>occupation</b> defined as retired/unemployed; self-employed; employed | Not measured          | Not measured                                       | Not reported                                                          |
| Source of measurement                                 | questionnaire                                                                                         | questionnaire                             | questionnaire                                                                               |                                                   | questionnaire                                                            |                       |                                                    |                                                                       |
| # of time points measured                             | 1                                                                                                     | 1                                         | ≥8                                                                                          |                                                   | 1                                                                        |                       |                                                    |                                                                       |



| Name of cohort            | ACCME's HPV and Cervical Cancer Study                                                                                                            | AWI-Gen                                | HAALSI                                                                      | NCD Intervention Programme                                                                                 | DUCS-HTN                                                                            | Ibadan Study of Aging                                                                                                                                                                 | Prospective Cohort in Democratic Republic of Congo  | The Benin Study                                                            |
|---------------------------|--------------------------------------------------------------------------------------------------------------------------------------------------|----------------------------------------|-----------------------------------------------------------------------------|------------------------------------------------------------------------------------------------------------|-------------------------------------------------------------------------------------|---------------------------------------------------------------------------------------------------------------------------------------------------------------------------------------|-----------------------------------------------------|----------------------------------------------------------------------------|
| SES definition            | SES defined using wealth index as lowest 40%, middle 40%, and highest 20%                                                                        | SES defined using HH attributes        | SES defined using wealth index quintiles                                    | SES defined using HH monthly income into low (<2,000 Mauritian Rupee), middle (2,500-4,999), high (≥5,000) | SES defined as HH wealth index quintiles: richest; richer; average; poorer; poorest | SES defined as low if ratio of participant's total possessions to median number of possessions in total sample is <0.5, low-average if 0.5-1.0, high-average if 1.0-2.0, high if >2.0 | SES defined as high/low                             | SES defined as low; medium; high                                           |
| Source of measurement     | generated wealth index using PCA with varimax rotation to compute factor scores based on sum of ownership of HH items weighted by factor loading | questionnaire                          | questionnaire                                                               | questionnaire                                                                                              | created through PCA of HH characteristics and assets                                | assessed by taking inventory of 21 HH and personal items                                                                                                                              | questionnaire                                       | assessed using HH amenity score as proxy for HH income                     |
| # of time points measured | 1                                                                                                                                                | 1                                      | ≥8                                                                          | ≥1                                                                                                         | 1                                                                                   | 1                                                                                                                                                                                     | 1                                                   | ≥1                                                                         |
| Lifestyle Risk Factor(s)  |                                                                                                                                                  |                                        |                                                                             |                                                                                                            |                                                                                     |                                                                                                                                                                                       |                                                     |                                                                            |
| Smoking status definition | smoking status defined as age when use became regular; measure of use/daily and total duration;                                                  | smoking status definition not reported | smoking status defined as past/present; quantity; frequency; duration; type | smoking status defined as yes/no                                                                           | smoking status defined as never; former; current, 0-9/day; current, ≥10/day         | smoking status defined as ever smoked; yes; no                                                                                                                                        | smoking status defined as current smoker/non-smoker | smoking status defined as current; former (stopped ≤6mo prior); non-smoker |

| Name of cohort            | ACCME's HPV and Cervical Cancer Study                                                                                                      | AWI-Gen                             | HAALSI                                                                                | NCD Intervention Programme    | DUCS-HTN                                                  | Ibadan Study of Aging                      | Prospective Cohort in Democratic Republic of Congo | The Benin Study                                                                                                         |
|---------------------------|--------------------------------------------------------------------------------------------------------------------------------------------|-------------------------------------|---------------------------------------------------------------------------------------|-------------------------------|-----------------------------------------------------------|--------------------------------------------|----------------------------------------------------|-------------------------------------------------------------------------------------------------------------------------|
|                           | preferred type/brand; start or successfully quit; exposure to second hand smoke                                                            |                                     |                                                                                       |                               |                                                           |                                            |                                                    |                                                                                                                         |
| Source of measurement     | tools adapted from PhenX toolkit version 5.6                                                                                               | questionnaire                       | questionnaire                                                                         | questionnaire                 | questionnaire                                             | questionnaire                              | questionnaire                                      | collected using WHO-STEPwise questionnaire                                                                              |
| # of time points measured | ≥1                                                                                                                                         | 1                                   | ≥8                                                                                    | ≥1                            | 1                                                         | 2                                          | 1                                                  | ≥1                                                                                                                      |
| Alcohol use definition    | alcohol use defined as age when use became regular; measure of use/daily and total duration; preferred type/brand; start successfully quit | alcohol use definition not reported | alcohol use defined as ever consumed; daily quantity; type; binge drinking behaviours | alcohol use defined as yes/no | alcohol use defined as 0g/day; 0-10; >10                  | alcohol use defined as ever drank; yes; no | alcohol use defined as non-drinker/drinker         | alcohol use defined as none (0g/day); moderate (≤15 for females, ≤20 for males); heavy (>15 for females, >20 for males) |
| Source of measurement     | tools adapted from PhenX toolkit version 5.6                                                                                               | questionnaire                       | questionnaire                                                                         | questionnaire                 | questionnaire; assumed 14g as standard drink portion size | questionnaire                              | questionnaire                                      | collected using WHO-STEPwise questionnaire                                                                              |
| # of time points measured | ≥1                                                                                                                                         | 1                                   | ≥8                                                                                    | ≥1                            | 1                                                         | 2                                          | 1                                                  | ≥1                                                                                                                      |

| Name of cohort                 | ACCME's HPV and Cervical Cancer Study                                             | AWI-Gen                      | HAALSI                                                                                    | NCD Intervention Programme | DUCS-HTN                                                                                                                     | Ibadan Study of Aging | Prospective Cohort in Democratic Republic of Congo                                                                                                                                 | The Benin Study                                                                                                  |
|--------------------------------|-----------------------------------------------------------------------------------|------------------------------|-------------------------------------------------------------------------------------------|----------------------------|------------------------------------------------------------------------------------------------------------------------------|-----------------------|------------------------------------------------------------------------------------------------------------------------------------------------------------------------------------|------------------------------------------------------------------------------------------------------------------|
| Poor diet definition           | diet definition not reported                                                      | diet definition not reported | diet defined as consumption, frequency, quantity of fruit, vegetables, bread, soft drinks | Not measured               | Not measured                                                                                                                 | Not measured          | diet defined as Western-style breakfast with bread, tea and milk, butter, margarine, eggs, animal fat and protein vs African traditional diet with cassava or maize and vegetables | diet defined as low, medium, high food score                                                                     |
| Source of measurement          | Nigerian food frequency questionnaire previously developed by study investigators | questionnaire                | questionnaire                                                                             |                            |                                                                                                                              |                       | questionnaire                                                                                                                                                                      | sentinel food consumption score calculated from short food frequency questionnaire of 10 food groups in last 3mo |
| # of time points measured      | 1                                                                                 | 1                            | ≥8                                                                                        |                            |                                                                                                                              |                       | 1                                                                                                                                                                                  | 2                                                                                                                |
| Physical inactivity definition | PA definition not reported                                                        | PA definition not reported   | PA defined as type of work, exercise and sedentary activity; amount of time spent         | Not measured               | PA defined as highest (144.0-1008.0MET/hrs/wk); higher (47.0-141.3); average (14.7046.7); lower (4.4-14.0); lowest (0.0-4.0) | Not measured          | physical inactivity defined by both 75th percentiles of seated and laying position time in hrs and MET value ranging 3-6kcal/min                                                   | physical inactivity defined as ≥3 MET <30min or <3 MET, any duration                                             |

| Name of cohort                     | ACCME's HPV and Cervical Cancer Study                                                                                                           | AWI-Gen                           | HAALSI                                          | NCD Intervention Programme | DUCS-HTN                                                            | Ibadan Study of Aging | Prospective Cohort in Democratic Republic of Congo                | The Benin Study                            |
|------------------------------------|-------------------------------------------------------------------------------------------------------------------------------------------------|-----------------------------------|-------------------------------------------------|----------------------------|---------------------------------------------------------------------|-----------------------|-------------------------------------------------------------------|--------------------------------------------|
| Source of measurement              | modified Harvard School of Public Health's Nurses' Health Study II PA questionnaire                                                             | exercise/general PA questionnaire | International PA Questionnaire                  |                            | collected using GPAQ to assess PA for work, transportation, leisure |                       | collected using GPAQ with Comparative Risk Assessment methodology | collected using WHO-STEPwise questionnaire |
| # of time points measured          | ≥2                                                                                                                                              | 1                                 | ≥8                                              |                            | 1                                                                   |                       | 1                                                                 | ≥1                                         |
| <b>Breastfeeding definition</b>    | Not measured                                                                                                                                    | Not measured                      | Not measured                                    | Not measured               | Not measured                                                        | Not measured          | Not measured                                                      | Not measured                               |
| Source of measurement              |                                                                                                                                                 |                                   |                                                 |                            |                                                                     |                       |                                                                   |                                            |
| # of time points measured          |                                                                                                                                                 |                                   |                                                 |                            |                                                                     |                       |                                                                   |                                            |
| <b>Puberty definition</b>          | <b>puberty</b> defined as age start of regular periods questionnaire                                                                            | Not measured                      | Not measured                                    | Not measured               | Not measured                                                        | Not measured          | Not measured                                                      | Not measured                               |
| Source of measurement              |                                                                                                                                                 |                                   |                                                 |                            |                                                                     |                       |                                                                   |                                            |
| # of time points measured          | 5                                                                                                                                               |                                   |                                                 |                            |                                                                     |                       |                                                                   |                                            |
| <b>Sexual behaviour definition</b> | <b>sexual behaviour</b> defined as history of sexual intercourse (vaginal, anal, oral), use of contraceptive, sex toys/lubricants questionnaire | Not measured                      | <b>sexual behaviour</b> definition not reported | Not measured               | Not measured                                                        | Not measured          | Not measured                                                      | Not measured                               |
| Source of measurement              |                                                                                                                                                 |                                   | questionnaire                                   |                            |                                                                     |                       |                                                                   |                                            |

| Name of cohort                       | ACCME's HPV and Cervical Cancer Study    | AWI-Gen                                                    | HAALSI                                                                                                                                                      | NCD Intervention Programme                                                        | DUCS-HTN     | Ibadan Study of Aging | Prospective Cohort in Democratic Republic of Congo                              | The Benin Study                                                                           |
|--------------------------------------|------------------------------------------|------------------------------------------------------------|-------------------------------------------------------------------------------------------------------------------------------------------------------------|-----------------------------------------------------------------------------------|--------------|-----------------------|---------------------------------------------------------------------------------|-------------------------------------------------------------------------------------------|
| # of time points measured            | 2                                        |                                                            | ≥1                                                                                                                                                          |                                                                                   |              |                       |                                                                                 |                                                                                           |
| <b>Physiological Risk Factor(s)</b>  |                                          |                                                            |                                                                                                                                                             |                                                                                   |              |                       |                                                                                 |                                                                                           |
| <b>Birthweight status definition</b> | Not measured                             | Not measured                                               | Not measured                                                                                                                                                | Not measured                                                                      | Not measured | Not measured          | Not measured                                                                    | Not measured                                                                              |
| Source of measurement                |                                          |                                                            |                                                                                                                                                             |                                                                                   |              |                       |                                                                                 |                                                                                           |
| # of time points measured            |                                          |                                                            |                                                                                                                                                             |                                                                                   |              |                       |                                                                                 |                                                                                           |
| <b>Body composition definition</b>   | Not measured                             | Not measured                                               | Not measured                                                                                                                                                | Not measured                                                                      | Not measured | Not measured          | Not measured                                                                    | Not measured                                                                              |
| Source of measurement                |                                          |                                                            |                                                                                                                                                             |                                                                                   |              |                       |                                                                                 |                                                                                           |
| # of time points measured            |                                          |                                                            |                                                                                                                                                             |                                                                                   |              |                       |                                                                                 |                                                                                           |
| <b>Cholesterol definition</b>        | <b>abnormal lipids</b> defined as yes/no | <b>abnormal lipids</b> defined using HDL, LDL, Total-C, Tg | <b>abnormal lipids</b> defined as questionnaire history; measured Total-C ≥6.2mmol/L or LDL>4.1 or HDL <1.19 or Tg >2.25 or taking medication for condition | <b>abnormal lipids</b> defined using HDL, Total-C, Tg                             | Not measured | Not measured          | <b>abnormal lipids</b> defined using Tg and HDL                                 | <b>abnormal lipids</b> defined as Tg >1.70mmol/L, HDL ≤1,29 in females and ≤1.03 in males |
| Source of measurement                | <b>lipid</b> measurement not reported    | <b>lipids</b> measured from fasting blood samples          | <b>lipids</b> measured using finger prick PTS Panel #1710 lipid panel test strips                                                                           | <b>lipids</b> measured using fasting blood samples analysed with manual enzymatic | Not measured | Not measured          | <b>lipids</b> measured using fasting serum and plasma samples collected, frozen | <b>lipids</b> measured using fasting blood samples collected, frozen at -30C, and         |

| Name of cohort                  | ACCME's HPV and Cervical Cancer Study                                      | AWI-Gen                                            | HAALSI                                                                                             | NCD Intervention Programme                                                       | DUCS-HTN     | Ibadan Study of Aging | Prospective Cohort in Democratic Republic of Congo | The Benin Study                 |
|---------------------------------|----------------------------------------------------------------------------|----------------------------------------------------|----------------------------------------------------------------------------------------------------|----------------------------------------------------------------------------------|--------------|-----------------------|----------------------------------------------------|---------------------------------|
|                                 |                                                                            |                                                    | (Cardio Chek PA Silver version)                                                                    | methods (1987) and Chemistry Profile Analyzer Model LS (Coultronics) (1992,1998) |              |                       | at -20C, and analysed                              | analysed with Elitechgroup kits |
| # of time points measured       | 2                                                                          | 1                                                  | ≥8                                                                                                 | 2                                                                                |              |                       | 1                                                  | 3                               |
| <b>Proteinuria definition</b>   | <b>proteinuria</b> definition not reported                                 | Not measured                                       | Not measured                                                                                       | Not measured                                                                     | Not measured | Not measured          | Not measured                                       | Not measured                    |
| Source of measurement           | spot urine samples collected and tested with Multistix 10 SG reagent strip |                                                    |                                                                                                    |                                                                                  |              |                       |                                                    |                                 |
| # of time points measured       | 1                                                                          |                                                    |                                                                                                    |                                                                                  |              |                       |                                                    |                                 |
| <b>HIV infection definition</b> | Not measured                                                               | <b>HIV infection</b> definition not reported       | <b>HIV infection</b> defined as positive if confirmatory test was positive                         | Not measured                                                                     | Not measured | Not measured          | Not measured                                       | Not measured                    |
| Source of measurement           |                                                                            | testing offered to participants on voluntary basis | determined 1) Vironostika Unifrom 11 screening assay; 2) if positive, confirmed using Roche Elecys |                                                                                  |              |                       |                                                    |                                 |
| # of time points measured       |                                                                            | 1                                                  | ≥8                                                                                                 |                                                                                  |              |                       |                                                    |                                 |

| Name of cohort            | ACCME's HPV and Cervical Cancer Study                                                         | AWI-Gen      | HAALSI                                                                                                           | NCD Intervention Programme | DUCS-HTN     | Ibadan Study of Aging | Prospective Cohort in Democratic Republic of Congo | The Benin Study |
|---------------------------|-----------------------------------------------------------------------------------------------|--------------|------------------------------------------------------------------------------------------------------------------|----------------------------|--------------|-----------------------|----------------------------------------------------|-----------------|
| HPV infection definition  | HPV-DNA defined as HPV positive/HPV negative                                                  | Not measured | Not measured                                                                                                     | Not measured               | Not measured | Not measured          | Not measured                                       | Not measured    |
| Source of measurement     | Cervical exfoliated samples analysed for HPV and hrHPV using SPF10 PCR-DEIA-LIPA25, version 1 |              |                                                                                                                  |                            |              |                       |                                                    |                 |
| # of time points measured | 2                                                                                             |              |                                                                                                                  |                            |              |                       |                                                    |                 |
| TB infection definition   | Not measured                                                                                  | Not measured | TB infection definition not reported                                                                             | Not measured               | Not measured | Not measured          | Not measured                                       | Not measured    |
| Source of measurement     |                                                                                               |              | questionnaire                                                                                                    |                            |              |                       |                                                    |                 |
| # of time points measured |                                                                                               |              | ≥8                                                                                                               |                            |              |                       |                                                    |                 |
| Anaemia definition        | Not measured                                                                                  | Not measured | anaemia defined as mild 12.9g/dl-11 in males and 11.9-11 in females; moderate 11-8 in both; severe <8 in females | Not measured               | Not measured | Not measured          | Not measured                                       | Not measured    |
| Source of measurement     |                                                                                               |              | Hb measured using finger prick Hemocue Hb 201                                                                    |                            |              |                       |                                                    |                 |

| Name of cohort            | ACCME's HPV and Cervical Cancer Study | AWI-Gen                                                 | HAALSI                                    | NCD Intervention Programme | DUCS-HTN     | Ibadan Study of Aging | Prospective Cohort in Democratic Republic of Congo | The Benin Study |
|---------------------------|---------------------------------------|---------------------------------------------------------|-------------------------------------------|----------------------------|--------------|-----------------------|----------------------------------------------------|-----------------|
| # of time points measured |                                       |                                                         | +microvette (Hemocue Hb 201 +Analyser) ≥8 |                            |              |                       |                                                    |                 |
| Genetics                  | Not measured                          | genetics data held in genome-wide SNP genotype database | Not measured                              | Not measured               | Not measured | Not measured          | Not measured                                       | Not measured    |
| Source of measurement     |                                       | H3Africa SNP array                                      |                                           |                            |              |                       |                                                    |                 |
| # of time points measured |                                       | 1                                                       |                                           |                            |              |                       |                                                    |                 |

Hb: haemoglobin; PA: physical activity; TB: tuberculosis



STable 7d: Characteristics of risk factor data of included studies with adults aged >18 years, sampled from occupational and clinical populations

| Name of cohort                                        | Basotho Gold Miners Cohort | TLC Cohort Study                                                     | Cohort of HIV-infected, ART-naïve adults | Operational cohort of treatment naïve HIV-infected men and women | Prospective cohort of nulliparous women                        | ABC-DO Study                                         | HARP Study                                                                                                                    | CoLTART Study                                                                                       |
|-------------------------------------------------------|----------------------------|----------------------------------------------------------------------|------------------------------------------|------------------------------------------------------------------|----------------------------------------------------------------|------------------------------------------------------|-------------------------------------------------------------------------------------------------------------------------------|-----------------------------------------------------------------------------------------------------|
| <b>Demographic &amp; Environmental Risk Factor(s)</b> |                            |                                                                      |                                          |                                                                  |                                                                |                                                      |                                                                                                                               |                                                                                                     |
| <b>Education definition</b>                           | Not measured               | <b>education</b> defined as no formal education; secondary; tertiary | Not measured                             | Not measured                                                     | <b>education</b> defined as none; primary; secondary; tertiary | <b>education</b> defined as <secondary/>secondary    | <b>education</b> defined as no schooling; primary/incomplete secondary; completed secondary; graduate/postgraduate; not known | <b>education</b> defined as incomplete primary/none; complete primary; ≥secondary                   |
| Source of measurement                                 |                            | questionnaire                                                        |                                          |                                                                  | questionnaire                                                  | questionnaire                                        | questionnaire                                                                                                                 | questionnaire                                                                                       |
| # of time points measured                             |                            | 1                                                                    |                                          |                                                                  | 1                                                              | 1                                                    | 1                                                                                                                             | 1                                                                                                   |
| <b>Occupation definition</b>                          | Not measured               | <b>occupation</b> defined as unemployed/employed                     | Not measured                             | <b>occupation</b> defined as employed/unemployed                 | Not measured                                                   | <b>occupation</b> defined as skilled; unskilled; n/a | <b>occupation</b> defined as employed/unemployed                                                                              | <b>occupation</b> defined as peasant farmer; gainful employment; self-employed/business; unemployed |
| Source of measurement                                 |                            | questionnaire                                                        |                                          | questionnaire                                                    |                                                                | questionnaire                                        | questionnaire                                                                                                                 | questionnaire                                                                                       |
| # of time points measured                             |                            | 1                                                                    |                                          | ≥15                                                              |                                                                | 1                                                    | 1                                                                                                                             | 1                                                                                                   |

| Name of cohort                    | Basotho Gold Miners Cohort                                                                                                    | TLC Cohort Study | Cohort of HIV-infected, ART-naïve adults | Operational cohort of treatment naïve HIV-infected men and women | Prospective cohort of nulliparous women | ABC-DO Study                                                                                   | HARP Study   | CoLTART Study                             |
|-----------------------------------|-------------------------------------------------------------------------------------------------------------------------------|------------------|------------------------------------------|------------------------------------------------------------------|-----------------------------------------|------------------------------------------------------------------------------------------------|--------------|-------------------------------------------|
| SES definition                    | Not measured                                                                                                                  |                  |                                          | SES defined using HH income as <100 Rand/mo; 1000-5000; >5000    |                                         | SES defined using sum of 9 equally weighted possessions as low (0-3), medium (4-6), high (7-9) |              | SES defined using HH asset score tertiles |
| Source of measurement             |                                                                                                                               |                  |                                          | questionnaire                                                    |                                         | questionnaire                                                                                  |              | questionnaire                             |
| # of time points measured         |                                                                                                                               |                  |                                          | 1                                                                |                                         | 1                                                                                              |              | 1                                         |
| Environmental exposure definition | <b>silica dust exposure</b> defined as no dust; low dust; medium dust; high dust                                              | Not measured     | Not measured                             | Not measured                                                     | Not measured                            | Not measured                                                                                   | Not measured | Not measured                              |
| Source of measurement             | classified by company occupational hygienist using data from mine's routine dust surveillance programme and miners' last jobs |                  |                                          |                                                                  |                                         |                                                                                                |              |                                           |
| # of time points measured         | 2                                                                                                                             |                  |                                          |                                                                  |                                         |                                                                                                |              |                                           |
| Lifestyle Risk Factor(s)          |                                                                                                                               |                  |                                          |                                                                  |                                         |                                                                                                |              |                                           |

| Name of cohort                   | Basotho Gold Miners Cohort              | TLC Cohort Study | Cohort of HIV-infected, ART-naïve adults | Operational cohort of treatment naïve HIV-infected men and women | Prospective cohort of nulliparous women | ABC-DO Study                                                                                          | HARP Study                                                            | CoLTART Study                                                                        |
|----------------------------------|-----------------------------------------|------------------|------------------------------------------|------------------------------------------------------------------|-----------------------------------------|-------------------------------------------------------------------------------------------------------|-----------------------------------------------------------------------|--------------------------------------------------------------------------------------|
| <b>Smoking status definition</b> | <b>smoking status</b> defined as yes/no | Not measured     | Not measured                             | Not measured                                                     | Not measured                            | <b>smoking status</b> defined as ever/never regularly smoked (>5 cig/day or use of snuff/wk for 6 mo) | <b>smoking status</b> defined as never/ever                           | <b>smoking status</b> defined as never; ex-smoker; current                           |
| Source of measurement            | questionnaire                           |                  |                                          |                                                                  |                                         | questionnaire                                                                                         | questionnaire                                                         | questionnaire                                                                        |
| # of time points measured        | 2                                       |                  |                                          |                                                                  |                                         | 1                                                                                                     | 1                                                                     | 1                                                                                    |
| <b>Alcohol use definition</b>    | Not measured                            | Not measured     | Not measured                             | Not measured                                                     | Not measured                            | <b>alcohol intake</b> defined as ever drank, now or in past; if yes, how often per wk                 | <b>alcohol use</b> defined as never; sometimes but <monthly; ≥monthly | <b>alcohol use</b> defined as never; ever >1mo prior; within <1mo                    |
| Source of measurement            |                                         |                  |                                          |                                                                  |                                         | questionnaire                                                                                         | questionnaire                                                         | questionnaire                                                                        |
| # of time points measured        |                                         |                  |                                          |                                                                  |                                         | 1                                                                                                     | 1                                                                     | 1                                                                                    |
| <b>Poor diet definition</b>      | Not measured                            | Not measured     | Not measured                             | Not measured                                                     | Not measured                            | Not measured                                                                                          | Not measured                                                          | <b>diet</b> defined as consumption of animal protein, fruit, vegetables, sugar, salt |
| Source of measurement            |                                         |                  |                                          |                                                                  |                                         |                                                                                                       |                                                                       | questionnaire                                                                        |
| # of time points measured        |                                         |                  |                                          |                                                                  |                                         |                                                                                                       |                                                                       | 1                                                                                    |

| Name of cohort                        | Basotho Gold Miners Cohort | TLC Cohort Study | Cohort of HIV-infected, ART-naïve adults | Operational cohort of treatment naïve HIV-infected men and women | Prospective cohort of nulliparous women                         | ABC-DO Study                                                               | HARP Study                                                                                                              | CoLTART Study                                          |
|---------------------------------------|----------------------------|------------------|------------------------------------------|------------------------------------------------------------------|-----------------------------------------------------------------|----------------------------------------------------------------------------|-------------------------------------------------------------------------------------------------------------------------|--------------------------------------------------------|
| <b>Physical inactivity definition</b> | Not measured               | Not measured     | Not measured                             | Not measured                                                     | Not measured                                                    | Not measured                                                               | Not measured                                                                                                            | <b>PA</b> defined as low; moderate; high questionnaire |
| Source of measurement                 |                            |                  |                                          |                                                                  |                                                                 |                                                                            |                                                                                                                         |                                                        |
| # of time points measured             |                            |                  |                                          |                                                                  |                                                                 |                                                                            |                                                                                                                         | 1                                                      |
| <b>Breastfeeding definition</b>       | Not measured               | Not measured     | Not measured                             | Not measured                                                     | Not measured                                                    | <b>breastfeeding</b> defined as yes/no; if yes, for how long questionnaire | Not measured                                                                                                            | Not measured                                           |
| Source of measurement                 |                            |                  |                                          |                                                                  |                                                                 |                                                                            |                                                                                                                         |                                                        |
| # of time points measured             |                            |                  |                                          |                                                                  |                                                                 | 1                                                                          |                                                                                                                         |                                                        |
| <b>Puberty definition</b>             | Not measured               | Not measured     | Not measured                             | Not measured                                                     | Not measured                                                    | <b>puberty</b> defined as age at first menstruation questionnaire          | Not measured                                                                                                            | Not measured                                           |
| Source of measurement                 |                            |                  |                                          |                                                                  |                                                                 |                                                                            |                                                                                                                         |                                                        |
| # of time points measured             |                            |                  |                                          |                                                                  |                                                                 | 1                                                                          |                                                                                                                         |                                                        |
| <b>Sexual behaviour definition</b>    | Not measured               | Not measured     | Not measured                             | Not measured                                                     | <b>sexual behaviour</b> defined using condom use as never; ever | Not measured                                                               | <b>sexual behaviour</b> defined as age at fist sex; lifetime sexual partners; ever cleans vagina; # of partners in last | Not measured                                           |

| Name of cohort                       | Basotho Gold Miners Cohort | TLC Cohort Study | Cohort of HIV-infected, ART-naïve adults | Operational cohort of treatment naïve HIV-infected men and women | Prospective cohort of nulliparous women | ABC-DO Study | HARP Study      | CoLTART Study                                                                          |
|--------------------------------------|----------------------------|------------------|------------------------------------------|------------------------------------------------------------------|-----------------------------------------|--------------|-----------------|----------------------------------------------------------------------------------------|
|                                      |                            |                  |                                          |                                                                  |                                         |              | 3mo; condom use |                                                                                        |
| Source of measurement                |                            |                  |                                          |                                                                  | questionnaire                           |              | 1               |                                                                                        |
| # of time points measured            |                            |                  |                                          |                                                                  | 1                                       |              | ≥1              |                                                                                        |
| <b>Physiological Risk Factor(s)</b>  |                            |                  |                                          |                                                                  |                                         |              |                 |                                                                                        |
| <b>Birthweight status definition</b> | Not measured               | Not measured     | Not measured                             | Not measured                                                     | Not measured                            | Not measured | Not measured    | Not measured                                                                           |
| Source of measurement                |                            |                  |                                          |                                                                  |                                         |              |                 |                                                                                        |
| # of time points measured            |                            |                  |                                          |                                                                  |                                         |              |                 |                                                                                        |
| <b>Body composition definition</b>   | Not measured               | Not measured     | Not measured                             | Not measured                                                     | Not measured                            | Not measured | Not measured    | Not measured                                                                           |
| Source of measurement                |                            |                  |                                          |                                                                  |                                         |              |                 |                                                                                        |
| # of time points measured            |                            |                  |                                          |                                                                  |                                         |              |                 |                                                                                        |
| <b>Cholesterol definition</b>        | Not measured               | Not measured     | Not measured                             | Not measured                                                     | Not measured                            | Not measured | Not measured    | <b>abnormal lipids</b> defined as HDL<1, LDL>3.4, Total-C>5.2, TG>1.69, or Total-C-HDL |

| Name of cohort                  | Basotho Gold Miners Cohort                                    | TLC Cohort Study | Cohort of HIV-infected, ART-naïve adults                                                                                 | Operational cohort of treatment naïve HIV-infected men and women | Prospective cohort of nulliparous women | ABC-DO Study                                      | HARP Study                                       | CoLTART Study                                         |
|---------------------------------|---------------------------------------------------------------|------------------|--------------------------------------------------------------------------------------------------------------------------|------------------------------------------------------------------|-----------------------------------------|---------------------------------------------------|--------------------------------------------------|-------------------------------------------------------|
|                                 |                                                               |                  |                                                                                                                          |                                                                  |                                         |                                                   |                                                  | ratio>5.1 or being on lipid lower medicine            |
| Source of measurement           |                                                               |                  |                                                                                                                          |                                                                  |                                         |                                                   |                                                  | <b>lipids</b> measured using Cobas Integra 400 plus 3 |
| # of time points measured       |                                                               |                  |                                                                                                                          |                                                                  |                                         |                                                   |                                                  |                                                       |
| <b>Proteinuria definition</b>   | Not measured                                                  | Not measured     | <b>proteinuria</b> defined as $\geq 0.3g$ of protein or 1+ or greater 24hr urine specimen or semi-quantitative dip stick | Not measured                                                     | Not measured                            | Not measured                                      | Not measured                                     | Not measured                                          |
| Source of measurement           |                                                               |                  |                                                                                                                          |                                                                  |                                         |                                                   |                                                  |                                                       |
| # of time points measured       |                                                               |                  | 1                                                                                                                        |                                                                  |                                         |                                                   |                                                  |                                                       |
| <b>HIV infection definition</b> | <b>HIV infection</b> definition not reported                  | Not measured     | <b>HIV infection</b> defined using WHO clinical staging                                                                  | Not measured                                                     | Not measured                            | <b>HIV infection</b> defined as yes; no/not known | <b>HIV infection</b> defined as HIV-1 serostatus | Not measured                                          |
| Source of measurement           | urine specimen screened using GACPAT with GACELISA to confirm |                  | not reported                                                                                                             |                                                                  |                                         | questionnaire; medical records if HIV tested      | blood samples collected                          |                                                       |

| Name of cohort            | Basotho Gold Miners Cohort | TLC Cohort Study | Cohort of HIV-infected, ART-naïve adults | Operational cohort of treatment naïve HIV-infected men and women | Prospective cohort of nulliparous women | ABC-DO Study | HARP Study                                                                                                                                                                                                               | CoLTART Study |
|---------------------------|----------------------------|------------------|------------------------------------------|------------------------------------------------------------------|-----------------------------------------|--------------|--------------------------------------------------------------------------------------------------------------------------------------------------------------------------------------------------------------------------|---------------|
| # of time points measured | ≥1                         |                  | ≥2                                       |                                                                  |                                         | 1            | 1                                                                                                                                                                                                                        |               |
| HPV infection definition  | Not measured               | Not measured     | Not measured                             | Not measured                                                     | Not measured                            | Not measured | <b>HPV-DNA</b> defined as high risk using International Agency for Research on Cancer classification: 'carcinogenic to humans' (HPV 16, 18 , 31, 33, 35, 39, 45, 51, 52, 56, 58, 59) and 'probable carcinogenic' (HPV68) | Not measured  |
| Source of measurement     |                            |                  |                                          |                                                                  |                                         |              | cervical samples collected using Digene cervical sampler; HR-HPV testing performed using qualitative Digene hC-II; genotyping with INNO-LiPA HPV genotyping Extra assay                                                  |               |
| # of time points measured |                            |                  |                                          |                                                                  |                                         |              | 2                                                                                                                                                                                                                        |               |

| Name of cohort                 | Basotho Gold Miners Cohort                                                                                                       | TLC Cohort Study | Cohort of HIV-infected, ART-naïve adults | Operational cohort of treatment naïve HIV-infected men and women                                                                                                                               | Prospective cohort of nulliparous women | ABC-DO Study                                   | HARP Study   | CoLTART Study |
|--------------------------------|----------------------------------------------------------------------------------------------------------------------------------|------------------|------------------------------------------|------------------------------------------------------------------------------------------------------------------------------------------------------------------------------------------------|-----------------------------------------|------------------------------------------------|--------------|---------------|
| <b>TB infection definition</b> | <b>TB infection</b> definition not reported                                                                                      | Not measured     | Not measured                             | <b>TB infection</b> defined as current (either an diagnosis occurred within 9mo, at baseline, or within 60 days after baseline) or past (diagnosis occurred $\geq 9$ months prior to baseline) | Not measured                            | <b>TB infection</b> defined as yes/no          | Not measured | Not measured  |
| Source of measurement          | based on symptoms and/or chest radiography with 2 sputum samples collected from suspects for smear microscopy and liquid culture |                  |                                          | >1 sputum sample collected from suspects for smear microscopy and liquid culture                                                                                                               |                                         | questionnaire                                  |              |               |
| # of time points measured      | 2                                                                                                                                |                  |                                          | 2                                                                                                                                                                                              |                                         | 1                                              |              |               |
| <b>Anaemia definition</b>      | Not measured                                                                                                                     | Not measured     | Not measured                             | Not measured                                                                                                                                                                                   | Not measured                            | <b>anaemia</b> defined as yes/no questionnaire | Not measured | Not measured  |
| Source of measurement          |                                                                                                                                  |                  |                                          |                                                                                                                                                                                                |                                         |                                                |              |               |



|                           |                                   |                         |                                                 |                                                                         |                                                |                     |                   |                      |
|---------------------------|-----------------------------------|-------------------------|-------------------------------------------------|-------------------------------------------------------------------------|------------------------------------------------|---------------------|-------------------|----------------------|
| <b>Name of cohort</b>     | <b>Basotho Gold Miners Cohort</b> | <b>TLC Cohort Study</b> | <b>Cohort of HIV-infected, ART-naïve adults</b> | <b>Operational cohort of treatment naïve HIV-infected men and women</b> | <b>Prospective cohort of nulliparous women</b> | <b>ABC-DO Study</b> | <b>HARP Study</b> | <b>CoLTART Study</b> |
| # of time points measured |                                   |                         |                                                 |                                                                         |                                                | 1                   |                   |                      |

PCA: principal components analysis; HH: household; PA: physical activity; Tg: triglycerides; GPAQ: Global Physical Activity Questionnaire; Hb: haemoglobin; SES: socio-economic status; Hb: haemoglobin

STable 7d continued: Characteristics of risk factor data of included studies with adults aged >18 years, sampled from occupational and clinical populations

| Name of cohort                                        | Prospective cohort study in Ghana                                                                                           | RWISA                                                           | Prospective cohort study in Benin                                           | Uganda AIDS Rural Treatment Outcomes (UARTO) cohort                              |
|-------------------------------------------------------|-----------------------------------------------------------------------------------------------------------------------------|-----------------------------------------------------------------|-----------------------------------------------------------------------------|----------------------------------------------------------------------------------|
| <b>Demographic &amp; Environmental Risk Factor(s)</b> |                                                                                                                             |                                                                 |                                                                             |                                                                                  |
| <b>Education definition</b>                           | <b>educaiton</b> defined as no formal education; primary; lower secondary; upper secondary; higher tertiary                 | <b>Not measured</b>                                             | <b>education</b> defined as any formal education/none                       | <b>education</b> defined as <primary/>primary                                    |
| Source of measurement                                 | questionnaire                                                                                                               |                                                                 | questionnaire                                                               | questionnaire                                                                    |
| # of time points measured                             | 1                                                                                                                           |                                                                 | 3                                                                           | ≥1                                                                               |
| <b>Occupation definition</b>                          | <b>occupation</b> defined using economic activity as informal sector employment; formally employed; non-economically active | Not measured                                                    | Not measured                                                                | <b>occupation</b> defined as employed/unemployed                                 |
| Source of measurement                                 | questionnaire                                                                                                               |                                                                 |                                                                             | questionnaire                                                                    |
| # of time points measured                             | 1                                                                                                                           |                                                                 |                                                                             | ≥1                                                                               |
| <b>SES definition</b>                                 | Not measured                                                                                                                | <b>SES</b> defined as income <10K Rwandan Francs; 10K-35K; >35K | <b>SES</b> defined using wealth quintiles as 1 (most poor) - 5 (least poor) | <b>SES</b> defined as HH asset wealth                                            |
| Source of measurement                                 |                                                                                                                             | questionnaire                                                   | questionnaire                                                               | measured by applying PCA to 25 binary variables of HH assets and characteristics |
| # of time points measured                             |                                                                                                                             | 1                                                               | 3                                                                           | ≥1                                                                               |
| <b>Lifestyle Risk Factor(s)</b>                       |                                                                                                                             |                                                                 |                                                                             |                                                                                  |
| <b>Smoking status definition</b>                      | Not measured                                                                                                                | Not measured                                                    | Not measured                                                                | <b>smoking status</b> defined as never; past/current                             |

| Name of cohort                       | Prospective cohort study in Ghana | RWISA        | Prospective cohort study in Benin | Uganda AIDS Rural Treatment Outcomes (UARTO) cohort                                             |
|--------------------------------------|-----------------------------------|--------------|-----------------------------------|-------------------------------------------------------------------------------------------------|
| Source of measurement                |                                   |              |                                   | questionnaire                                                                                   |
| # of time points measured            |                                   |              |                                   | ≥1                                                                                              |
| <b>Poor diet definition</b>          | Not measured                      | Not measured | Not measured                      | <b>diet</b> defined as average number of meals per wk with meat                                 |
| Source of measurement                |                                   |              |                                   | questionnaire                                                                                   |
| # of time points measured            |                                   |              |                                   | 1                                                                                               |
| <b>Breastfeeding definition</b>      | Not measured                      | Not measured | Not measured                      | Not measured                                                                                    |
| Source of measurement                |                                   |              |                                   |                                                                                                 |
| # of time points measured            |                                   |              |                                   |                                                                                                 |
| <b>Puberty definition</b>            | Not measured                      | Not measured | Not measured                      | Not measured                                                                                    |
| Source of measurement                |                                   |              |                                   |                                                                                                 |
| # of time points measured            |                                   |              |                                   |                                                                                                 |
| <b>Sexual behaviour definition</b>   | Not measured                      | Not measured | Not measured                      | <b>sexual behaviour</b> defined as number of sexual partners in lifetime and incidences of rape |
| Source of measurement                |                                   |              |                                   | questionnaire                                                                                   |
| # of time points measured            |                                   |              |                                   | 1                                                                                               |
| <b>Physiological Risk Factor(s)</b>  |                                   |              |                                   |                                                                                                 |
| <b>Birthweight status definition</b> | Not measured                      | Not measured | Not measured                      | Not measured                                                                                    |

| Name of cohort                     | Prospective cohort study in Ghana | RWISA                                                                                                                | Prospective cohort study in Benin | Uganda AIDS Rural Treatment Outcomes (UARTO) cohort |
|------------------------------------|-----------------------------------|----------------------------------------------------------------------------------------------------------------------|-----------------------------------|-----------------------------------------------------|
| Source of measurement              |                                   |                                                                                                                      |                                   |                                                     |
| # of time points measured          |                                   |                                                                                                                      |                                   |                                                     |
| <b>Body composition definition</b> | Not measured                      | Not measured                                                                                                         | Not measured                      | Not measured                                        |
| Source of measurement              |                                   |                                                                                                                      |                                   |                                                     |
| # of time points measured          |                                   |                                                                                                                      |                                   |                                                     |
| <b>Cholesterol definition</b>      | Not measured                      | <b>abnormal lipids</b> definition not reported                                                                       | Not measured                      | Not measured                                        |
| Source of measurement              |                                   | <b>lipids</b> measured and lipoprotein levels determined                                                             |                                   |                                                     |
| # of time points measured          |                                   | 1                                                                                                                    |                                   |                                                     |
| <b>Proteinuria definition</b>      | Not measured                      | <b>proteinuria</b> defined as $\geq+1$                                                                               | Not measured                      | Not measured                                        |
| Source of measurement              |                                   | single urine sample                                                                                                  |                                   |                                                     |
| # of time points measured          |                                   | 1                                                                                                                    |                                   |                                                     |
| <b>HIV infection definition</b>    | Not measured                      | <b>HIV infection</b> defined as positive/negative                                                                    | Not measured                      | Not measured                                        |
| Source of measurement              |                                   | diagnosis performed by testing algorithm, requiring two positive results from commercial HIV-1 antibodies ELISA kits |                                   |                                                     |
| # of time points measured          |                                   | 1                                                                                                                    |                                   |                                                     |

| Name of cohort                  | Prospective cohort study in Ghana          | RWISA                                                                                                                                                                                                                                                                  | Prospective cohort study in Benin                                                                                         | Uganda AIDS Rural Treatment Outcomes (UARTO) cohort |
|---------------------------------|--------------------------------------------|------------------------------------------------------------------------------------------------------------------------------------------------------------------------------------------------------------------------------------------------------------------------|---------------------------------------------------------------------------------------------------------------------------|-----------------------------------------------------|
| <b>HPV infection definition</b> | <b>birthweight</b> defined as low (<2500g) | <b>HPV-DNA</b> defined as 1) positive for HPV-16; 2) negative for HPV-16, positive for HPV-18; 3) positive for other carcinogenic types but not for HPV-16, 18; 4) positive for non-carcinogenic types and negative for all carcinogenic types; 5) HPV negative by PCR | Not measured                                                                                                              | Not measured                                        |
| Source of measurement           | measured within 24hr of birth              | CVL specimens digested with Proteinase K, detected using the L1 MY09/MY11 modified PCR system with AmpliTaq Gold polymerase, products probed for the presence of HPV DNA by Southern blot with radiolabeled generic probe mixture                                      |                                                                                                                           |                                                     |
| # of time points measured       | 1                                          | 1                                                                                                                                                                                                                                                                      |                                                                                                                           |                                                     |
| <b>Anaemia definition</b>       | Not measured                               | Not measured                                                                                                                                                                                                                                                           | <b>anaemia</b> defined as severe if Hb<4g/dl or if Hb <4g/dl and pallor with shock, respiratory difficulties, transfusion | Not measured                                        |
| Source of measurement           |                                            |                                                                                                                                                                                                                                                                        | <b>Hb</b> measured using HemoCue                                                                                          |                                                     |
| # of time points measured       |                                            |                                                                                                                                                                                                                                                                        | 2                                                                                                                         |                                                     |
